# Supplementary material for: A Comprehensive Assessment of Ultraviolet-Radiation-Induced Mutations in Flammulina filiformis Using Whole-Genome Resequencing
Source: MDPI journal article supplement (doi:10.3390/jof10030228), 2024-03-20
Supplement: s1 [file all.path.xls]

KEGG_A_class	KEGG_B_class	Pathway	Count (238)	Pathway ID	Genes	K_IDs
Cellular Processes	Cell growth and death	Cell cycle - yeast	15	ko04111	g5755;g9096;g8561;g7510;g6291;g5393;g4319;g4031;g3911;g2938;g15549;g13214;g11743;g11042;g10125	K04563+K02220+K02605+K06676+K06669+K02603+K09175+K03360+K06653+K03456+K01078+K06678+K06666+K03347+K02220
Genetic Information Processing	Translation	RNA transport	14	ko03013	g12573;g12213;g904;g7518;g4832;g3908;g3291;g15714;g15431;g15306;g14034;g13320;g13222;g11273	K03254+K00784+K03240+K03236+K03251+K12879+K03241+K14288+K14326+K14307+K14303+K07562+K13126+K14326
Genetic Information Processing	Transcription	Spliceosome	13	ko03040	g7709;g891;g861;g6342;g6138;g6125;g4782;g4094;g3908;g3822;g319;g2633;g11117	K12820+K12840+K03283+K12830+K12870+K12813+K12873+K12860+K12879+K12844+K12893+K11092+K12855
Metabolism	Global and Overview	Biosynthesis of amino acids	12	ko01230	g1559;g8625;g4580;g4286;g9820;g7249;g7225;g6334;g502;g3988;g2888;g11145	K00264+K00620+K00052+K14152+K13830+K00147+K01697+K00616+K01694+K00818+K14455+K00948
Metabolism	Nucleotide metabolism	Purine metabolism	11	ko00230	g11554;g8896;g7432;g6222;g504;g3810;g2509;g2488;g2139;g16055;g11145	K10807+K03783+K02320+K01768+K00764+K02324+K11788+K03010+K10808+K03027+K00948
Metabolism	Global and Overview	Carbon metabolism	11	ko01200	g4910;g7225;g6334;g5849;g5806;g321;g3178;g2888;g2737;g14321;g11145	K01899+K01697+K00616+K00122+K00281+K05605+K00140+K14455+K01057+K00863+K00948
Cellular Processes	Cell growth and death	Meiosis - yeast	11	ko04113	g5755;g9096;g8561;g6291;g6222;g5393;g5191;g3037;g2983;g2938;g10125	K04563+K02220+K02605+K06669+K01768+K02603+K04345+K12765+K06269+K03456+K02220
Metabolism	Carbohydrate metabolism	Amino sugar and nucleotide sugar metabolism	10	ko00520	g4435;g8806;g8631;g8112;g5023;g4764;g2770;g2170;g11779;g11775	K00698+K01809+K01711+K12373+K00698+K01209+K00326+K00326+K15920+K15920
Metabolism	Nucleotide metabolism	Pyrimidine metabolism	10	ko00240	g11554;g8896;g7432;g6012;g4762;g3810;g2488;g2139;g16055;g10348	K10807+K03783+K02320+K01937+K11541+K02324+K03010+K10808+K03027+K00757
Human Diseases	Infectious diseases	Epstein-Barr virus infection	9	ko05169	g5803;g861;g7590;g5191;g3788;g3457;g2488;g16055;g1057	K15979+K03283+K03115+K04345+K03124+K10591+K03010+K03027+K06053
Genetic Information Processing	Folding, sorting and degradation	Protein processing in endoplasmic reticulum	8	ko04141	g10882;g861;g7396;g577;g15104;g11042;g1046;g10417	K13993+K03283+K09523+K14016+K10082+K03347+K01228+K12275
Human Diseases	Cancers	Viral carcinogenesis	7	ko05203	g5803;g890;g5191;g3788;g2852;g11550;g1057	K15979+K10610+K04345+K03124+K04392+K02330+K06053
Cellular Processes	Cellular commiunity	Tight junction	7	ko04530	g7746;g7590;g3250;g3247;g2938;g1118;g10823	K06110+K03115+K06111+K06111+K03456+K05692+K04630
Genetic Information Processing	Folding, sorting and degradation	Ubiquitin mediated proteolysis	7	ko04120	g890;g7307;g7221;g5633;g4031;g3457;g11042	K10610+K10590+K10582+K10592+K03360+K10591+K03347
Metabolism	Carbohydrate metabolism	Starch and sucrose metabolism	7	ko00500	g7594;g4623;g1715;g11779;g11775;g11568;g11330	K01196+K00700+K05349+K15920+K15920+K01178+K05349
Metabolism	Energy metabolism	Oxidative phosphorylation	7	ko00190	g450;g602;g15420;g13321;g12208;g1110;g1008	K03885+K02149+K03964+K01535+K02155+K03934+K03943
Genetic Information Processing	Replication and repair	Nucleotide excision repair	7	ko03420	g890;g746;g3810;g323;g2682;g15889;g15421	K10610+K10739+K02324+K07466+K10847+K10843+K10846
Human Diseases	Infectious diseases	HTLV-I infection	7	ko05166	g7177;g6962;g5191;g4829;g3810;g11550;g10152	K04728+K15040+K04345+K06640+K02324+K02330+K04348
Genetic Information Processing	Folding, sorting and degradation	RNA degradation	7	ko03018	g2194;g7932;g7453;g4970;g15099;g1333;g13222	K12599+K03679+K12617+K12586+K12618+K12598+K13126
Genetic Information Processing	Translation	Ribosome biogenesis in eukaryotes	7	ko03008	g7711;g7590;g6593;g2324;g15099;g13320;g12219	K07178+K03115+K06943+K14555+K12618+K07562+K14550
Metabolism	Lipid metabolism	Glycerophospholipid metabolism	7	ko00564	g8973;g842;g7820;g5678;g15549;g14381;g12200	K16368+K13507+K06123+K00981+K01078+K00006+K00968
Metabolism	Carbohydrate metabolism	Inositol phosphate metabolism	6	ko00562	g470;g8749;g7757;g3178;g16101;g15549	K18083+K01099+K05857+K00140+K00914+K01078
Human Diseases	Cancers	Pathways in cancer	6	ko05200	g5191;g5171;g4337;g2852;g2215;g10823	K04345+K15589+K00799+K04392+K04536+K04630
Genetic Information Processing	Replication and repair	Fanconi anemia pathway	6	ko03460	g746;g4829;g4193;g323;g11086;g1006	K10739+K06640+K15363+K07466+K15361+K11137
Cellular Processes	Transport and catabolism	Phagosome	6	ko04145	g602;g4023;g2852;g16101;g12208;g1118	K02149+K07374+K04392+K00914+K02155+K05692
Organismal Systems	Nervous system	Dopaminergic synapse	6	ko04728	g5191;g2983;g2938;g2215;g10823;g10152	K04345+K06269+K03456+K04536+K04630+K04348
Cellular Processes	Cell growth and death	Cell cycle	6	ko04110	g8561;g7177;g6291;g5393;g4829;g11042	K02605+K04728+K06669+K02603+K06640+K03347
Cellular Processes	Cell motility	Regulation of actin cytoskeleton	6	ko04810	g1048;g4328;g2983;g2852;g15737;g1118	K05740+K05767+K06269+K04392+K05767+K05692
Organismal Systems	Endocrine system	Oxytocin signaling pathway	6	ko04921	g8930;g5191;g2983;g1118;g10823;g10152	K08794+K04345+K06269+K05692+K04630+K04348
Metabolism	Amino acid metabolism	Valine, leucine and isoleucine degradation	6	ko00280	g5810;g4890;g321;g3178;g2229;g1598	K00128+K07513+K05605+K00140+K09699+K01027
Cellular Processes	Cell growth and death	Oocyte meiosis	6	ko04114	g6291;g5191;g2983;g2938;g11042;g10152	K06669+K04345+K06269+K03456+K03347+K04348
Human Diseases	Neurodegenerative diseases	Parkinson's disease	6	ko05012	g6962;g5191;g15420;g1110;g10823;g1008	K15040+K04345+K03964+K03934+K04630+K03943
Human Diseases	Neurodegenerative diseases	Huntington's disease	5	ko05016	g6962;g2488;g15420;g1110;g1008	K15040+K03010+K03964+K03934+K03943
Genetic Information Processing	Replication and repair	Homologous recombination	5	ko03440	g7707;g746;g672;g323;g10820	K10877+K10739+K10875+K07466+K10866
Human Diseases	Infectious diseases	Tuberculosis	5	ko05152	g6599;g16101;g15549;g12208;g10152	K01379+K00914+K01078+K02155+K04348
Human Diseases	Cancers	MicroRNAs in cancer	5	ko05206	g2080;g7177;g5564;g4343;g11098	K07204+K04728+K05658+K11592+K05658
Genetic Information Processing	Translation	mRNA surveillance pathway	5	ko03015	g2983;g2938;g15431;g13222;g11273	K06269+K03456+K14326+K13126+K14326
Genetic Information Processing	Replication and repair	DNA replication	5	ko03030	g746;g7432;g5893;g3810;g323	K10739+K02320+K10744+K02324+K07466
Environmental Information Processing	Signal transduction	Ras signaling pathway	5	ko04014	g7395;g5191;g4857;g2852;g2215	K10632+K04345+K08052+K04392+K04536
Human Diseases	Substance dependence	Alcoholism	5	ko05034	g5191;g3660;g2983;g2215;g10823	K04345+K15014+K06269+K04536+K04630
Organismal Systems	Nervous system	GABAergic synapse	5	ko04727	g5191;g4821;g4773;g2215;g10823	K04345+K15376+K06027+K04536+K04630
Cellular Processes	Transport and catabolism	Endocytosis	5	ko04144	g9797;g861;g4537;g3457;g3137	K12493+K03283+K12197+K10591+K12195
Environmental Information Processing	Signal transduction	MAPK signaling pathway	5	ko04010	g861;g5191;g4857;g2852;g10152	K03283+K04345+K08052+K04392+K04348
Cellular Processes	Transport and catabolism	Lysosome	5	ko04142	g4643;g8112;g7665;g6599;g12208	K01279+K12373+K12391+K01379+K02155
Environmental Information Processing	Signal transduction	Phosphatidylinositol signaling system	5	ko04070	g470;g8749;g7757;g5678;g16101	K18083+K01099+K05857+K00981+K00914
Human Diseases	Infectious diseases	Herpes simplex infection	5	ko05168	g7590;g759;g319;g2983;g11042	K03115+K03127+K12893+K06269+K03347
Genetic Information Processing	Transcription	Basal transcription factors	5	ko03022	g9081;g759;g3788;g2556;g15889	K03135+K03127+K03124+K03125+K10843
Environmental Information Processing	Membrane transport	ABC transporters	5	ko02010	g5980;g562;g5564;g3034;g11098	K15628+K05663+K05658+K08712+K05658
Environmental Information Processing	Signal transduction	PI3K-Akt signaling pathway	5	ko04151	g2080;g2938;g2852;g2215;g10901	K07204+K03456+K04392+K04536+K13303
Environmental Information Processing	Signal transduction	Wnt signaling pathway	5	ko04310	g7590;g5191;g2852;g11042;g10152	K03115+K04345+K04392+K03347+K04348
Organismal Systems	Immune system	Platelet activation	4	ko04611	g5191;g2983;g1118;g10823	K04345+K06269+K05692+K04630
Human Diseases	Endocrine and metabolic diseases	Non-alcoholic fatty liver disease (NAFLD)	4	ko04932	g2852;g15420;g1110;g1008	K04392+K03964+K03934+K03943
Organismal Systems	Circulatory system	Adrenergic signaling in cardiomyocytes	4	ko04261	g5191;g2983;g2938;g10823	K04345+K06269+K03456+K04630
Environmental Information Processing	Signal transduction	Calcium signaling pathway	4	ko04020	g7757;g6962;g5191;g10152	K05857+K15040+K04345+K04348
Organismal Systems	Endocrine system	Thyroid hormone signaling pathway	4	ko04919	g7757;g5191;g15829;g1118	K05857+K04345+K19029+K05692
Organismal Systems	Nervous system	Synaptic vesicle cycle	4	ko04721	g918;g602;g4773;g12208	K08486+K02149+K06027+K02155
Metabolism	Amino acid metabolism	Glycine, serine and threonine metabolism	4	ko00260	g7225;g5806;g502;g3987	K01697+K00281+K01694+K00643
Human Diseases	Infectious diseases	Vibrio cholerae infection	4	ko05110	g602;g5191;g12208;g1118	K02149+K04345+K02155+K05692
Environmental Information Processing	Signal transduction	AMPK signaling pathway	4	ko04152	g2080;g2938;g15829;g10711	K07204+K03456+K19029+K00507
Metabolism	Amino acid metabolism	Tyrosine metabolism	4	ko00350	g2888;g207;g1994;g10485	K14455+K13953+K00451+K00505
Organismal Systems	Nervous system	Glutamatergic synapse	4	ko04724	g5191;g2215;g10823;g10152	K04345+K04536+K04630+K04348
Environmental Information Processing	Signal transduction	cGMP - PKG signaling pathway	4	ko04022	g6962;g2983;g10823;g10152	K15040+K06269+K04630+K04348
Organismal Systems	Immune system	Chemokine signaling pathway	4	ko04062	g5191;g2852;g2215;g10823	K04345+K04392+K04536+K04630
Environmental Information Processing	Signal transduction	cAMP signaling pathway	4	ko04024	g5191;g2983;g2852;g10823	K04345+K06269+K04392+K04630
Human Diseases	Neurodegenerative diseases	Alzheimer's disease	4	ko05010	g15420;g1110;g10152;g1008	K03964+K03934+K04348+K03943
Human Diseases	Cancers	Proteoglycans in cancer	4	ko05205	g5191;g2983;g2852;g1118	K04345+K06269+K04392+K05692
Metabolism	Carbohydrate metabolism	Propanoate metabolism	4	ko00640	g4910;g321;g3178;g2229	K01899+K05605+K00140+K09699
Metabolism	Carbohydrate metabolism	Pentose phosphate pathway	4	ko00030	g6334;g2737;g15835;g11145	K00616+K01057+K01621+K00948
Environmental Information Processing	Signal transduction	Sphingolipid signaling pathway	4	ko04071	g6599;g2938;g2852;g10823	K01379+K03456+K04392+K04630
Metabolism	Amino acid metabolism	Alanine, aspartate and glutamate metabolism	4	ko00250	g1559;g504;g4762;g2888	K00264+K00764+K11541+K14455
Metabolism	Global and Overview	2-Oxocarboxylic acid metabolism	4	ko01210	g8625;g4580;g3988;g2888	K00620+K00052+K00818+K14455
Cellular Processes	Cellular commiunity	Focal adhesion	4	ko04510	g1048;g2983;g2852;g1118	K05740+K06269+K04392+K05692
Genetic Information Processing	Translation	Ribosome	4	ko03010	g8771;g7633;g7300;g16140	K02901+K02943+K02987+K02929
Metabolism	Xenobiotics biodegradation and metabolism	Drug metabolism - cytochrome P450	3	ko00982	g4337;g207;g1636	K00799+K13953+K00485
Human Diseases	Infectious diseases	Influenza A	3	ko05164	g861;g7396;g1118	K03283+K09523+K05692
Metabolism	Amino acid metabolism	Tryptophan metabolism	3	ko00380	g5810;g15134;g10143	K00128+K00463+K00452
Organismal Systems	Endocrine system	Estrogen signaling pathway	3	ko04915	g861;g5191;g10823	K03283+K04345+K04630
Organismal Systems	Immune system	Leukocyte transendothelial migration	3	ko04670	g2852;g1118;g10823	K04392+K05692+K04630
Environmental Information Processing	Signal transduction	MAPK signaling pathway - yeast	3	ko04011	g2764;g2603;g2215	K11240+K11230+K04536
Cellular Processes	Cell growth and death	p53 signaling pathway	3	ko04115	g7177;g4829;g2139	K04728+K06640+K10808
Human Diseases	Infectious diseases	Shigellosis	3	ko05131	g1048;g2852;g1118	K05740+K04392+K05692
Human Diseases	Endocrine and metabolic diseases	AGE-RAGE signaling pathway in diabetic complications	3	ko04933	g1048;g7757;g2852	K05740+K05857+K04392
Organismal Systems	Endocrine system	Glucagon signaling pathway	3	ko04922	g6247;g5191;g10152	K11434+K04345+K04348
Metabolism	Amino acid metabolism	Phenylalanine, tyrosine and tryptophan biosynthesis	3	ko00400	g9820;g502;g2888	K13830+K01694+K14455
Organismal Systems	Nervous system	Retrograde endocannabinoid signaling	3	ko04723	g5191;g2215;g10823	K04345+K04536+K04630
Organismal Systems	Endocrine system	Renin secretion	3	ko04924	g5191;g10823;g10152	K04345+K04630+K04348
Organismal Systems	Endocrine system	Melanogenesis	3	ko04916	g5191;g10823;g10485	K04345+K04630+K00505
Cellular Processes	Cellular commiunity	Adherens junction	3	ko04520	g7590;g2852;g1118	K03115+K04392+K05692
Organismal Systems	Nervous system	Long-term potentiation	3	ko04720	g5191;g2983;g10152	K04345+K06269+K04348
Metabolism	Lipid metabolism	Fatty acid degradation	3	ko00071	g5810;g4890;g207	K00128+K07513+K13953
Environmental Information Processing	Signal transduction	Hippo signaling pathway -fly	3	ko04391	g9014;g2938;g1118	K09236+K03456+K05692
Metabolism	Lipid metabolism	Ether lipid metabolism	3	ko00565	g7820;g7564;g15549	K06123+K16794+K01078
Metabolism	Metabolism of other amino acids	Glutathione metabolism	3	ko00480	g11554;g4337;g2139	K10807+K00799+K10808
Organismal Systems	Development	Axon guidance	3	ko04360	g2852;g10823;g10152	K04392+K04630+K04348
Human Diseases	Substance dependence	Morphine addiction	3	ko05032	g5191;g2215;g10823	K04345+K04536+K04630
Organismal Systems	Nervous system	Serotonergic synapse	3	ko04726	g5191;g2215;g10823	K04345+K04536+K04630
Metabolism	Amino acid metabolism	Arginine biosynthesis	3	ko00220	g8625;g3988;g2888	K00620+K00818+K14455
Metabolism	Amino acid metabolism	Arginine and proline metabolism	3	ko00330	g7249;g5810;g2888	K00147+K00128+K14455
Cellular Processes	Cell growth and death	Apoptosis	3	ko04210	g7177;g5191;g10152	K04728+K04345+K04348
Metabolism	Lipid metabolism	Glycerolipid metabolism	3	ko00561	g842;g5810;g14321	K13507+K00128+K00863
Human Diseases	Infectious diseases	Epithelial cell signaling in Helicobacter pylori infection	3	ko05120	g602;g2852;g12208	K02149+K04392+K02155
Environmental Information Processing	Signal transduction	Rap1 signaling pathway	3	ko04015	g2852;g1118;g10823	K04392+K05692+K04630
Metabolism	Amino acid metabolism	Lysine degradation	3	ko00310	g8536;g5810;g12037	K11422+K00128+K11423
Genetic Information Processing	Replication and repair	Base excision repair	3	ko03410	g15891;g3810;g11550	K03648+K02324+K02330
Organismal Systems	Environmental adaptation	Circadian entrainment	3	ko04713	g5191;g2215;g10823	K04345+K04536+K04630
Genetic Information Processing	Translation	Aminoacyl-tRNA biosynthesis	3	ko00970	g6095;g11041;g4061	K01872+K01867+K01890
Cellular Processes	Cellular commiunity	Gap junction	3	ko04540	g5191;g4023;g10823	K04345+K07374+K04630
Organismal Systems	Digestive system	Bile secretion	3	ko04976	g5564;g5191;g11098	K05658+K04345+K05658
Environmental Information Processing	Signal transduction	FoxO signaling pathway	3	ko04068	g7177;g6247;g10901	K04728+K11434+K13303
Metabolism	Carbohydrate metabolism	Fructose and mannose metabolism	3	ko00051	g8806;g8631;g15829	K01809+K01711+K19029
Organismal Systems	Digestive system	Gastric acid secretion	3	ko04971	g5191;g1118;g10823	K04345+K05692+K04630
Metabolism	Carbohydrate metabolism	Glyoxylate and dicarboxylate metabolism	3	ko00630	g5849;g5806;g11270	K00122+K00281+K00015
Metabolism	Energy metabolism	Sulfur metabolism	3	ko00920	g7449;g5903;g7225	K00381+K00381+K01697
Metabolism	Metabolism of other amino acids	beta-Alanine metabolism	3	ko00410	g5810;g321;g3178	K00128+K05605+K00140
Environmental Information Processing	Signal transduction	Hippo signaling pathway	3	ko04390	g2983;g2938;g1118	K06269+K03456+K05692
Human Diseases	Substance dependence	Amphetamine addiction	3	ko05031	g5191;g2983;g10152	K04345+K06269+K04348
Cellular Processes	Transport and catabolism	Peroxisome	3	ko04146	g5980;g4890;g1119	K15628+K07513+K13339
Organismal Systems	Endocrine system	Insulin signaling pathway	3	ko04910	g2080;g5191;g2983	K07204+K04345+K06269
Organismal Systems	Nervous system	Cholinergic synapse	3	ko04725	g5191;g2215;g10823	K04345+K04536+K04630
Metabolism	Energy metabolism	Carbon fixation in photosynthetic organisms	2	ko00710	g2888;g15835	K14455+K01621
Organismal Systems	Immune system	Natural killer cell mediated cytotoxicity	2	ko04650	g2852;g10152	K04392+K04348
Genetic Information Processing	Transcription	RNA polymerase	2	ko03020	g2488;g16055	K03010+K03027
Human Diseases	Cancers	Renal cell carcinoma	2	ko05211	g5171;g2852	K15589+K04392
Metabolism	Xenobiotics biodegradation and metabolism	Metabolism of xenobiotics by cytochrome P450	2	ko00980	g4337;g207	K00799+K13953
Metabolism	Glycan biosynthesis and metabolism	N-Glycan biosynthesis	2	ko00510	g15452;g1046	K03847+K01228
Metabolism	Carbohydrate metabolism	Glycolysis / Gluconeogenesis	2	ko00010	g5810;g207	K00128+K13953
Human Diseases	Infectious diseases	Pathogenic Escherichia coli infection	2	ko05130	g4023;g1118	K07374+K05692
Environmental Information Processing	Signal transduction	TGF-beta signaling pathway	2	ko04350	g2938;g11042	K03456+K03347
Genetic Information Processing	Replication and repair	Non-homologous end-joining	2	ko03450	g7569;g10820	K10777+K10866
Human Diseases	Cardiovascular diseases	Viral myocarditis	2	ko05416	g2852;g1118	K04392+K05692
Metabolism	Lipid metabolism	Biosynthesis of unsaturated fatty acids	2	ko01040	g4890;g10711	K07513+K00507
Environmental Information Processing	Signal transduction	Hedgehog signaling pathway	2	ko04340	g9802;g5191	K02218+K04345
Metabolism	Energy metabolism	Nitrogen metabolism	2	ko00910	g1559;g2596	K00264+K01673
Metabolism	Metabolism of cofactors and vitamins	Nicotinate and nicotinamide metabolism	2	ko00760	g8896;g7749	K03783+K01950
Organismal Systems	Development	Osteoclast differentiation	2	ko04380	g2852;g10152	K04392+K04348
Metabolism	Biosynthesis of other secondary metabolites	Phenylpropanoid biosynthesis	2	ko00940	g1715;g11330	K05349+K05349
Organismal Systems	Circulatory system	Vascular smooth muscle contraction	2	ko04270	g5191;g2983	K04345+K06269
Organismal Systems	Excretory system	Vasopressin-regulated water reabsorption	2	ko04962	g5191;g4773	K04345+K06027
Human Diseases	Cancers	Transcriptional misregulation in cancers	2	ko05202	g7177;g5171	K04728+K15589
Environmental Information Processing	Signal transduction	NF-kappa B signaling pathway	2	ko04064	g7590;g7177	K03115+K04728
Human Diseases	Infectious diseases	Measles	2	ko05162	g861;g7590	K03283+K03115
Human Diseases	Cancers	Choline metabolism in cancer	2	ko05231	g2852;g12200	K04392+K00968
Metabolism	Metabolism of other amino acids	Cyanoamino acid metabolism	2	ko00460	g1715;g11330	K05349+K05349
Metabolism	Amino acid metabolism	Cysteine and methionine metabolism	2	ko00270	g7225;g2888	K01697+K14455
Metabolism	Xenobiotics biodegradation and metabolism	Chloroalkane and chloroalkene degradation	2	ko00625	g5810;g207	K00128+K13953
Organismal Systems	Sensory system	Inflammatory mediator regulation of TRP channels	2	ko04750	g5191;g2983	K04345+K06269
Human Diseases	Cardiovascular diseases	Dilated cardiomyopathy (DCM)	2	ko05414	g5191;g1118	K04345+K05692
Human Diseases	Neurodegenerative diseases	Prion diseases	2	ko05020	g861;g5191	K03283+K04345
Organismal Systems	Endocrine system	PPAR signaling pathway	2	ko03320	g4890;g10711	K07513+K00507
Metabolism	Biosynthesis of other secondary metabolites	Isoquinoline alkaloid biosynthesis	2	ko00950	g2888;g10485	K14455+K00505
Human Diseases	Neurodegenerative diseases	Amyotrophic lateral sclerosis (ALS)	2	ko05014	g2852;g10152	K04392+K04348
Organismal Systems	Sensory system	Olfactory transduction	2	ko04740	g5191;g2215	K04345+K04536
Organismal Systems	Endocrine system	Regulation of lipolysis in adipocyte	2	ko04923	g5191;g10823	K04345+K04630
Human Diseases	Infectious diseases	Chagas disease (American trypanosomiasis)	2	ko05142	g2938;g10823	K03456+K04630
Human Diseases	Immune diseases	Rheumatoid arthritis	2	ko05323	g602;g12208	K02149+K02155
Genetic Information Processing	Replication and repair	Mismatch repair	2	ko03430	g746;g323	K10739+K07466
Genetic Information Processing	Folding, sorting and degradation	SNARE interactions in vesicular transport	2	ko04130	g918;g2883	K08486+K08502
Human Diseases	Infectious diseases	Salmonella infection	2	ko05132	g2852;g1118	K04392+K05692
Metabolism	Energy metabolism	Methane metabolism	2	ko00680	g5849;g14321	K00122+K00863
Organismal Systems	Excretory system	Collecting duct acid secretion	2	ko04966	g602;g12208	K02149+K02155
Organismal Systems	Endocrine system	Progesterone-mediated oocyte maturation	2	ko04914	g5191;g10823	K04345+K04630
Environmental Information Processing	Signal transduction	VEGF signaling pathway	2	ko04370	g2852;g10152	K04392+K04348
Metabolism	Xenobiotics biodegradation and metabolism	Styrene degradation	2	ko00643	g200;g1994	K01502+K00451
Organismal Systems	Nervous system	Long-term depression	2	ko04730	g2938;g10823	K03456+K04630
Human Diseases	Infectious diseases	Toxoplasmosis	2	ko05145	g861;g10823	K03283+K04630
Human Diseases	Substance dependence	Cocaine addiction	2	ko05030	g5191;g10823	K04345+K04630
Human Diseases	Infectious diseases	Bacterial invasion of epithelial cells	2	ko05100	g2852;g1118	K04392+K05692
Metabolism	Glycan biosynthesis and metabolism	Other glycan degradation	2	ko00511	g8112;g1685	K12373+K01191
Metabolism	Carbohydrate metabolism	Pyruvate metabolism	2	ko00620	g5810;g4665	K00128+K00102
Metabolism	Amino acid metabolism	Histidine metabolism	2	ko00340	g4286;g5810	K14152+K00128
Metabolism	Global and Overview	Fatty acid metabolism	2	ko01212	g4890;g10711	K07513+K00507
Organismal Systems	Endocrine system	Aldosterone synthesis and secretion	2	ko04925	g8930;g5191	K08794+K04345
Organismal Systems	Immune system	B cell receptor signaling pathway	2	ko04662	g2852;g10152	K04392+K04348
Organismal Systems	Digestive system	Salivary secretion	1	ko04970	g5191	K04345
Metabolism	Metabolism of cofactors and vitamins	Folate biosynthesis	1	ko00790	g2451	K13950
Organismal Systems	Sensory system	Phototransduction - fly	1	ko04745	g1118	K05692
Metabolism	Glycan biosynthesis and metabolism	Other types of O-glycan biosynthesis	1	ko00514	g1160	K00728
Human Diseases	Cardiovascular diseases	Arrhythmogenic right ventricular cardiomyopathy (ARVC)	1	ko05412	g1118	K05692
Organismal Systems	Excretory system	Endocrine and other factor-regulated calcium reabsorption	1	ko04961	g5191	K04345
Human Diseases	Cancers	Pancreatic cancer	1	ko05212	g2852	K04392
Human Diseases	Infectious diseases	Pertussis	1	ko05133	g10823	K04630
Metabolism	Xenobiotics biodegradation and metabolism	Drug metabolism - other enzymes	1	ko00983	g10348	K00757
Metabolism	Amino acid metabolism	Valine, leucine and isoleucine biosynthesis	1	ko00290	g4580	K00052
Metabolism	Metabolism of cofactors and vitamins	Retinol metabolism	1	ko00830	g207	K13953
Organismal Systems	Immune system	Fc gamma R-mediated phagocytosis	1	ko04666	g2852	K04392
Metabolism	Global and Overview	Degradation of aromatic compounds	1	ko01220	g207	K13953
Organismal Systems	Environmental adaptation	Circadian rhythm	1	ko04710	g11042	K03347
Metabolism	Metabolism of cofactors and vitamins	Ubiquinone and other terpenoid-quinone biosynthesis	1	ko00130	g7203	K06125
Human Diseases	Cardiovascular diseases	Hypertrophic cardiomyopathy (HCM)	1	ko05410	g1118	K05692
Human Diseases	Infectious diseases	Hepatitis C	1	ko05160	g2938	K03456
Environmental Information Processing	Signal transduction	mTOR signaling pathway	1	ko04150	g2080	K07204
Organismal Systems	Immune system	Antigen processing and presentation	1	ko04612	g861	K03283
Genetic Information Processing	Folding, sorting and degradation	Proteasome	1	ko03050	g2663	K06699
Metabolism	Glycan biosynthesis and metabolism	Glycosphingolipid biosynthesis - globo series	1	ko00603	g8112	K12373
Human Diseases	Cancers	Chemical carcinogenesis	1	ko05204	g4337	K00799
Human Diseases	Infectious diseases	Amoebiasis	1	ko05146	g5191	K04345
Metabolism	Metabolism of cofactors and vitamins	Porphyrin and chlorophyll metabolism	1	ko00860	g3987	K00643
Organismal Systems	Immune system	Toll-like receptor signaling pathway	1	ko04620	g2852	K04392
Metabolism	Biosynthesis of other secondary metabolites	Betalain biosynthesis	1	ko00965	g10485	K00505
Metabolism	Carbohydrate metabolism	C5-Branched dibasic acid metabolism	1	ko00660	g4580	K00052
Organismal Systems	Digestive system	Fat digestion and absorption	1	ko04975	g2888	K14455
Cellular Processes	Cell growth and death	Cell cycle - Caulobacter	1	ko04112	g12146	K01338
Metabolism	Xenobiotics biodegradation and metabolism	Aminobenzoate degradation	1	ko00627	g15549	K01078
Metabolism	Glycan biosynthesis and metabolism	Glycosylphosphatidylinositol(GPI)-anchor biosynthesis	1	ko00563	g2971	K03859
Organismal Systems	Sensory system	Taste transduction	1	ko04742	g5191	K04345
Metabolism	Glycan biosynthesis and metabolism	Mucin type O-glycan biosynthesis	1	ko00512	g13503	K00710
Human Diseases	Cancers	Prostate cancer	1	ko05215	g4337	K00799
Organismal Systems	Endocrine system	Insulin secretion	1	ko04911	g5191	K04345
Metabolism	Biosynthesis of other secondary metabolites	Carbapenem biosynthesis	1	ko00332	g7249	K00147
Metabolism	Metabolism of terpenoids and polyketides	Terpenoid backbone biosynthesis	1	ko00900	g7614	K05355
Metabolism	Lipid metabolism	alpha-Linolenic acid metabolism	1	ko00592	g4890	K07513
Organismal Systems	Immune system	Cytosolic DNA-sensing pathway	1	ko04623	g16055	K03027
Metabolism	Carbohydrate metabolism	Butanoate metabolism	1	ko00650	g1598	K01027
Organismal Systems	Immune system	Fc epsilon RI signaling pathway	1	ko04664	g2852	K04392
Metabolism	Carbohydrate metabolism	Pentose and glucuronate interconversions	1	ko00040	g5810	K00128
Human Diseases	Infectious diseases	Legionellosis	1	ko05134	g861	K03283
Metabolism	Amino acid metabolism	Phenylalanine metabolism	1	ko00360	g2888	K14455
Organismal Systems	Endocrine system	Thyroid hormone synthesis	1	ko04918	g5191	K04345
Organismal Systems	Nervous system	Neurotrophin signaling pathway	1	ko04722	g2852	K04392
Organismal Systems	Immune system	T cell receptor signaling pathway	1	ko04660	g10152	K04348
Metabolism	Biosynthesis of other secondary metabolites	Tropane, piperidine and pyridine alkaloid biosynthesis	1	ko00960	g2888	K14455
Human Diseases	Cancers	Colorectal cancer	1	ko05210	g2852	K04392
Organismal Systems	Digestive system	Pancreatic secretion	1	ko04972	g2852	K04392
Genetic Information Processing	Folding, sorting and degradation	Sulfur relay system	1	ko04122	g16006	K11996
Human Diseases	Infectious diseases	Hepatitis B	1	ko05161	g890	K10610
Organismal Systems	Endocrine system	Ovarian Steroidogenesis	1	ko04913	g5191	K04345
Environmental Information Processing	Signal transduction	Notch signaling pathway	1	ko04330	g1057	K06053
Metabolism	Carbohydrate metabolism	Citrate cycle (TCA cycle)	1	ko00020	g4910	K01899
Metabolism	Metabolism of cofactors and vitamins	Riboflavin metabolism	1	ko00740	g10485	K00505
Organismal Systems	Sensory system	Phototransduction	1	ko04744	g2215	K04536
Metabolism	Glycan biosynthesis and metabolism	Glycosaminoglycan degradation	1	ko00531	g8112	K12373
Cellular Processes	Transport and catabolism	Regulation of autophagy	1	ko04140	g16101	K00914
Metabolism	Metabolism of terpenoids and polyketides	Limonene and pinene degradation	1	ko00903	g5810	K00128
Human Diseases	Infectious diseases	African trypanosomiasis	1	ko05143	g15134	K00463
Organismal Systems	Endocrine system	GnRH signaling pathway	1	ko04912	g5191	K04345
Metabolism	Glycan biosynthesis and metabolism	Glycosphingolipid biosynthesis - ganglio series	1	ko00604	g8112	K12373
Metabolism	Lipid metabolism	Synthesis and degradation of ketone bodies	1	ko00072	g1598	K01027
Organismal Systems	Environmental adaptation	Circadian rhythm - plant	1	ko04712	g7590	K03115
Metabolism	Xenobiotics biodegradation and metabolism	Naphthalene degradation	1	ko00626	g207	K13953
Human Diseases	Immune diseases	Primary immunodeficiency	1	ko05340	g15891	K03648
Genetic Information Processing	Folding, sorting and degradation	Protein export	1	ko03060	g10417	K12275
Metabolism	Metabolism of other amino acids	Phosphonate and phosphinate metabolism	1	ko00440	g12200	K00968
Metabolism	Carbohydrate metabolism	Ascorbate and aldarate metabolism	1	ko00053	g5810	K00128
Metabolism	Glycan biosynthesis and metabolism	Various types of N-glycan biosynthesis	1	ko00513	g15452	K03847
Organismal Systems	Immune system	RIG-I-like receptor signaling pathway	1	ko04622	g14321	K00863
Human Diseases	Endocrine and metabolic diseases	Insulin resistance	1	ko04931	g2983	K06269
