# Supplementary material for: A Comprehensive Assessment of Ultraviolet-Radiation-Induced Mutations in Flammulina filiformis Using Whole-Genome Resequencing
Source: MDPI journal article supplement (doi:10.3390/jof10030228), 2024-03-20
Supplement: s1 [file out.C.xls]

GO ID	Description	GeneRatio (334)	BgRatio (334)	pvalue	fdr	geneID
GO:0016020	membrane	216	216	1	1	g4211;g15457;g9797;g6464;g7440;g527;g470;g2520;g15880;g15282;g13959;g13424;g12113;g10811;g9946;g9578;g9140;g867;g8548;g8545;g848;g8316;g8277;g7919;g7820;g766;g7267;g7095;g6599;g4671;g4514;g3866;g3805;g316;g3060;g2929;g2855;g2737;g2723;g2399;g1884;g15809;g1562;g15420;g14466;g14064;g14022;g13998;g13874;g13864;g12451;g1234;g12048;g11646;g1164;g11476;g11324;g11240;g1110;g11003;g10791;g1057;g10401;g10…
GO:0005623	cell	160	160	1	1	g4211;g15457;g4217;g16047;g475;g672;g12573;g4832;g5803;g7932;g4970;g11042;g16122;g2556;g2756;g4782;g10417;g2595;g6291;g2324;g5681;g1635;g13911;g6087;g7564;g2663;g3337;g5719;g15889;g14381;g5535;g1118;g9797;g11542;g11324;g918;g7665;g6962;g8973;g9010;g13964;g5997;g15306;g6125;g15891;g10182;g10820;g4023;g11225;g13214;g12620;g12204;g4365;g3822;g6376;g10811;g9081;g7908;g7873;g7711;g7432;g6814;g6342;g59…
GO:0044464	cell part	157	157	1	1	g4211;g15457;g4217;g16047;g475;g672;g12573;g4832;g5803;g7932;g4970;g11042;g16122;g2556;g2756;g4782;g10417;g2595;g6291;g2324;g5681;g1635;g13911;g6087;g7564;g2663;g3337;g5719;g15889;g14381;g5535;g1118;g9797;g11542;g11324;g918;g7665;g6962;g8973;g9010;g13964;g5997;g15306;g6125;g15891;g10182;g10820;g4023;g11225;g13214;g12620;g12204;g4365;g3822;g6376;g10811;g9081;g7908;g7873;g7711;g7432;g6814;g6342;g59…
GO:0044425	membrane part	150	150	1	1	g15457;g10417;g9271;g8625;g6164;g5377;g4571;g450;g4435;g16240;g15837;g1553;g15156;g10390;g9958;g9915;g9823;g9820;g9672;g96;g918;g9169;g9166;g9126;g9055;g8973;g8957;g8942;g8730;g8610;g8558;g842;g7854;g7810;g7777;g760;g7499;g7416;g7359;g7203;g7185;g7149;g6667;g6632;g6522;g6497;g6410;g6286;g5980;g5810;g5694;g5678;g5636;g562;g5595;g5593;g5564;g5499;g5417;g5404;g5237;g5023;g4989;g4762;g4674;g4665;g451…
GO:0005622	intracellular	147	147	1	1	g4211;g15457;g4217;g16047;g475;g672;g12573;g4832;g5803;g7932;g4970;g11042;g16122;g2556;g2756;g4782;g10417;g2595;g6291;g2324;g5681;g1635;g13911;g6087;g7564;g2663;g3337;g5719;g15889;g14381;g5535;g1118;g9797;g918;g7665;g6962;g8973;g9010;g13964;g5997;g15306;g6125;g15891;g10182;g10820;g4023;g11225;g13214;g4365;g3822;g6376;g10811;g9081;g7908;g7873;g7711;g7432;g6814;g6342;g5932;g5922;g5393;g4674;g4671;g…
GO:0044424	intracellular part	147	147	1	1	g4211;g15457;g4217;g16047;g475;g672;g12573;g4832;g5803;g7932;g4970;g11042;g16122;g2556;g2756;g4782;g10417;g2595;g6291;g2324;g5681;g1635;g13911;g6087;g7564;g2663;g3337;g5719;g15889;g14381;g5535;g1118;g9797;g918;g7665;g6962;g8973;g9010;g13964;g5997;g15306;g6125;g15891;g10182;g10820;g4023;g11225;g13214;g4365;g3822;g6376;g10811;g9081;g7908;g7873;g7711;g7432;g6814;g6342;g5932;g5922;g5393;g4674;g4671;g…
GO:0016021	integral component of membrane	145	145	1	1	g10417;g9271;g8625;g6164;g5377;g4571;g450;g4435;g16240;g15837;g1553;g15156;g10390;g9958;g9915;g9823;g9820;g9672;g96;g918;g9169;g9166;g9126;g9055;g8973;g8957;g8942;g8730;g8610;g8558;g842;g7854;g7810;g7777;g760;g7499;g7416;g7359;g7203;g7185;g7149;g6667;g6632;g6522;g6497;g6410;g6286;g5980;g5810;g5694;g5678;g5636;g562;g5595;g5593;g5564;g5499;g5417;g5404;g5237;g5023;g4989;g4762;g4674;g4665;g4519;g4365…
GO:0031224	intrinsic component of membrane	145	145	1	1	g15457;g10417;g9271;g8625;g6164;g5377;g4571;g450;g4435;g16240;g15837;g1553;g15156;g10390;g9958;g9915;g9823;g9820;g9672;g96;g918;g9169;g9166;g9126;g9055;g8973;g8957;g8942;g8730;g8610;g8558;g842;g7854;g7810;g7777;g760;g7499;g7416;g7359;g7203;g7185;g7149;g6667;g6632;g6522;g6497;g6410;g6286;g5980;g5810;g5694;g5678;g5636;g562;g5595;g5593;g5564;g5499;g5417;g5404;g5237;g5023;g4989;g4762;g4674;g4665;g451…
GO:0043226	organelle	119	119	1	1	g4211;g15457;g4217;g9797;g475;g672;g16122;g2556;g2756;g4782;g10417;g2595;g6291;g1635;g13911;g6087;g7564;g3337;g5719;g15889;g5535;g1118;g918;g7665;g6962;g9010;g13964;g5997;g15306;g6125;g15891;g8973;g10182;g10820;g4023;g11225;g13214;g4365;g3822;g6376;g10811;g9081;g7908;g7873;g7711;g7432;g6814;g6342;g5932;g5922;g5393;g4674;g4671;g4094;g3788;g3693;g3076;g2682;g2464;g221;g16063;g16;g15714;g15421;g1531…
GO:0043229	intracellular organelle	119	119	1	1	g4211;g15457;g4217;g475;g672;g16122;g2556;g2756;g4782;g10417;g2595;g6291;g1635;g13911;g6087;g7564;g3337;g5719;g15889;g5535;g1118;g9797;g918;g7665;g6962;g9010;g13964;g5997;g15306;g6125;g15891;g8973;g10182;g10820;g4023;g11225;g13214;g4365;g3822;g6376;g10811;g9081;g7908;g7873;g7711;g7432;g6814;g6342;g5932;g5922;g5393;g4674;g4671;g4094;g3788;g3693;g3076;g2682;g2464;g221;g16063;g16;g15714;g15421;g1531…
GO:0043227	membrane-bounded organelle	97	97	1	1	g4211;g15457;g9797;g475;g2556;g2756;g4782;g10417;g16122;g2595;g1635;g13911;g6087;g5719;g15889;g918;g7665;g6962;g9010;g13964;g5997;g15306;g6125;g15891;g8973;g10182;g10820;g3822;g6376;g10811;g9081;g7908;g7873;g7711;g7564;g7432;g6814;g672;g6342;g6291;g5932;g5922;g5393;g4674;g4671;g4217;g4094;g3788;g3693;g3076;g2682;g2464;g221;g16063;g16;g15714;g15421;g15316;g14315;g1377;g13320;g11117;g1057;g12208;g7…
GO:0043231	intracellular membrane-bounded organelle	97	97	1	1	g4211;g15457;g475;g2556;g2756;g4782;g10417;g16122;g2595;g1635;g13911;g6087;g5719;g15889;g9797;g918;g7665;g6962;g9010;g13964;g5997;g15306;g6125;g15891;g8973;g10182;g10820;g3822;g6376;g10811;g9081;g7908;g7873;g7711;g7564;g7432;g6814;g672;g6342;g6291;g5932;g5922;g5393;g4674;g4671;g4217;g4094;g3788;g3693;g3076;g2682;g2464;g221;g16063;g16;g15714;g15421;g15316;g14315;g1377;g13320;g11117;g1057;g12208;g7…
GO:0005737	cytoplasm	73	73	1	1	g4211;g15457;g16047;g475;g12573;g4832;g10417;g2595;g13911;g14381;g9797;g918;g7665;g6962;g8973;g12208;g5803;g218;g9820;g7564;g6334;g5849;g4821;g4061;g4023;g15714;g14291;g13320;g11549;g1118;g10143;g7203;g6095;g8771;g7633;g7300;g5417;g4970;g3457;g2983;g16140;g15455;g637;g2380;g7746;g3250;g3247;g5719;g16006;g15889;g11098;g1160;g8625;g5674;g3988;g4289;g904;g15452;g2080;g16101;g4910;g5806;g4792;g1598;g…
GO:0032991	macromolecular complex	64	64	1	1	g15457;g4217;g16047;g475;g12573;g4832;g5803;g7932;g4970;g11042;g2556;g2756;g4782;g2324;g5681;g6087;g2663;g5719;g15889;g14381;g9010;g6125;g10820;g3788;g2913;g13019;g13214;g3822;g13964;g6095;g8771;g7633;g7300;g5417;g3457;g2983;g16140;g15455;g7746;g3250;g3247;g10823;g2488;g637;g7564;g11225;g4289;g3810;g904;g7449;g5903;g5023;g2380;g8536;g2080;g7590;g7416;g3697;g12208;g1491;g7665;g16122;g7282;g795
GO:0005634	nucleus	62	62	1	1	g2556;g2756;g4782;g16122;g1635;g6087;g5719;g15889;g9010;g13964;g5997;g15306;g6125;g10820;g3822;g6376;g10811;g9081;g7908;g7873;g7711;g7564;g7432;g6814;g672;g6342;g6291;g5932;g5922;g5393;g4674;g4671;g4217;g4094;g3788;g3693;g3076;g2682;g2464;g221;g16063;g16;g15714;g15421;g15316;g14315;g1377;g13320;g11117;g1057;g7282;g6593;g2488;g11225;g3810;g3445;g2913;g13019;g8536;g3697;g3857;g11946
GO:0044444	cytoplasmic part	58	58	1	1	g4211;g15457;g16047;g475;g12573;g4832;g10417;g2595;g13911;g14381;g9797;g918;g7665;g6962;g8973;g12208;g7203;g6095;g8771;g7633;g7300;g5417;g4970;g3457;g2983;g16140;g15455;g637;g2380;g7746;g3250;g3247;g5719;g16006;g15889;g11098;g1160;g8625;g5674;g3988;g4289;g904;g15452;g2080;g16101;g4910;g5806;g4792;g1598;g15420;g12928;g7416;g7449;g5903;g2488;g470;g795;g8610
GO:0044422	organelle part	56	56	1	1	g4211;g15457;g4217;g9797;g475;g672;g16122;g2556;g2756;g4782;g10417;g1635;g13911;g6087;g7564;g3337;g5719;g15889;g6962;g9010;g13964;g5997;g15306;g6125;g10820;g4023;g11225;g13214;g3822;g12208;g7203;g7282;g6593;g637;g2380;g2488;g1160;g8625;g5674;g3988;g3810;g15452;g2080;g16101;g3445;g5023;g2913;g13019;g8536;g7416;g3697;g7665;g3857;g11946;g470;g795
GO:0044446	intracellular organelle part	56	56	1	1	g4211;g15457;g4217;g475;g672;g16122;g2556;g2756;g4782;g10417;g1635;g13911;g6087;g7564;g3337;g5719;g15889;g9797;g6962;g9010;g13964;g5997;g15306;g6125;g10820;g4023;g11225;g13214;g3822;g12208;g7203;g7282;g6593;g637;g2380;g2488;g1160;g8625;g5674;g3988;g3810;g15452;g2080;g16101;g3445;g5023;g2913;g13019;g8536;g7416;g3697;g7665;g3857;g11946;g470;g795
GO:0043234	protein complex	45	45	1	1	g15457;g4217;g16047;g7932;g4970;g11042;g2556;g2756;g5681;g6087;g2663;g5719;g15889;g14381;g9010;g10820;g2913;g13019;g13214;g13964;g15455;g12573;g4832;g7746;g3250;g3247;g10823;g2488;g637;g7564;g11225;g3810;g904;g7449;g5903;g5023;g2380;g8536;g2080;g7590;g7416;g3697;g12208;g7665;g795
GO:0043228	non-membrane-bounded organelle	35	35	1	1	g4217;g475;g672;g16122;g2756;g6291;g1635;g7564;g3337;g5719;g5535;g1118;g4023;g11225;g13214;g4365;g6095;g8771;g7633;g7300;g5417;g4970;g3457;g2983;g16140;g7282;g6593;g637;g2380;g4289;g3810;g5023;g7449;g5903;g2488
GO:0043232	intracellular non-membrane-bounded organelle	35	35	1	1	g4217;g475;g672;g16122;g2756;g6291;g1635;g7564;g3337;g5719;g5535;g1118;g4023;g11225;g13214;g4365;g6095;g8771;g7633;g7300;g5417;g4970;g3457;g2983;g16140;g7282;g6593;g637;g2380;g4289;g3810;g5023;g7449;g5903;g2488
GO:0044428	nuclear part	27	27	1	1	g2556;g2756;g4782;g16122;g1635;g6087;g5719;g15889;g9010;g13964;g5997;g15306;g6125;g10820;g3822;g7282;g6593;g2488;g11225;g3810;g3445;g2913;g13019;g8536;g3697;g3857;g11946
GO:0030529	intracellular ribonucleoprotein complex	22	22	1	1	g475;g12573;g4832;g5803;g4782;g2324;g6125;g3822;g6095;g8771;g7633;g7300;g5417;g4970;g3457;g2983;g16140;g4289;g7282;g7449;g5903;g2488
GO:0031974	membrane-enclosed lumen	22	22	1	1	g475;g2556;g2756;g16122;g1635;g6087;g5719;g9010;g13964;g7282;g6593;g2488;g8625;g5674;g3988;g11225;g3810;g15889;g2913;g13019;g8536;g3857
GO:0043233	organelle lumen	22	22	1	1	g475;g2556;g2756;g16122;g1635;g6087;g5719;g9010;g13964;g7282;g6593;g2488;g8625;g5674;g3988;g11225;g3810;g15889;g2913;g13019;g8536;g3857
GO:0070013	intracellular organelle lumen	22	22	1	1	g475;g2556;g2756;g16122;g1635;g6087;g5719;g9010;g13964;g7282;g6593;g2488;g8625;g5674;g3988;g11225;g3810;g15889;g2913;g13019;g8536;g3857
GO:1990904	ribonucleoprotein complex	22	22	1	1	g475;g12573;g4832;g5803;g4782;g2324;g6125;g3822;g6095;g8771;g7633;g7300;g5417;g4970;g3457;g2983;g16140;g4289;g7282;g7449;g5903;g2488
GO:0031981	nuclear lumen	18	18	1	1	g2556;g2756;g16122;g1635;g6087;g5719;g9010;g13964;g7282;g6593;g2488;g11225;g3810;g15889;g2913;g13019;g8536;g3857
GO:0005739	mitochondrion	16	16	1	1	g475;g6962;g7203;g8625;g5674;g3988;g6095;g4910;g5806;g4792;g4289;g1598;g15420;g12928;g470;g795
GO:0012505	endomembrane system	16	16	1	1	g4211;g10417;g2595;g15457;g13911;g9797;g918;g7665;g5997;g15306;g8973;g1160;g15452;g3445;g7416;g8610
GO:0071944	cell periphery	16	16	1	1	g11542;g11324;g13321;g11098;g637;g2380;g7746;g3250;g3247;g10823;g918;g8772;g13874;g13864;g4153;g15911
GO:0031090	organelle membrane	15	15	1	1	g4211;g15457;g9797;g10417;g13911;g6962;g12208;g7203;g475;g1160;g2080;g16101;g3445;g7665;g795
GO:1902494	catalytic complex	15	15	1	1	g11042;g2556;g2756;g6087;g14381;g9010;g2913;g13019;g13964;g10823;g2488;g3810;g15889;g8536;g7416
GO:0005694	chromosome	11	11	1	1	g4217;g672;g16122;g2756;g6291;g1635;g5719;g13214;g11225;g3810;g2488
GO:0098588	bounding membrane of organelle	11	11	1	1	g4211;g15457;g9797;g10417;g13911;g6962;g12208;g1160;g2080;g16101;g7665
GO:0005840	ribosome	10	10	1	1	g475;g6095;g8771;g7633;g7300;g5417;g4970;g3457;g2983;g16140
GO:1990234	transferase complex	10	10	1	1	g11042;g2556;g6087;g9010;g13964;g2488;g3810;g15889;g8536;g7416
GO:0005856	cytoskeleton	9	9	1	1	g7564;g3337;g5535;g1118;g4023;g11225;g637;g2380;g5023
GO:0044427	chromosomal part	9	9	1	1	g4217;g672;g16122;g2756;g5719;g13214;g11225;g3810;g2488
GO:0044429	mitochondrial part	8	8	1	1	g475;g6962;g7203;g8625;g5674;g3988;g470;g795
GO:0098805	whole membrane	8	8	1	1	g15457;g13911;g6962;g12208;g918;g2080;g16101;g7665
GO:0000228	nuclear chromosome	7	7	1	1	g2756;g16122;g1635;g5719;g11225;g3810;g2488
GO:0005654	nucleoplasm	7	7	1	1	g2556;g6087;g9010;g13964;g2488;g15889;g8536
GO:0031967	organelle envelope	7	7	1	1	g6962;g5997;g15306;g7203;g475;g3445;g795
GO:0031975	envelope	7	7	1	1	g6962;g5997;g15306;g7203;g475;g3445;g795
GO:0044430	cytoskeletal part	7	7	1	1	g7564;g3337;g4023;g11225;g637;g2380;g5023
GO:0044451	nucleoplasm part	7	7	1	1	g2556;g6087;g9010;g13964;g2488;g15889;g8536
GO:0005794	Golgi apparatus	6	6	1	1	g4211;g9797;g7416;g7665;g8610;g13911
GO:0005886	plasma membrane	6	6	1	1	g13321;g11098;g10823;g918;g4153;g15911
GO:0044454	nuclear chromosome part	6	6	1	1	g2756;g16122;g5719;g11225;g3810;g2488
GO:0005618	cell wall	5	5	1	1	g11542;g11324;g8772;g13874;g13864
GO:0005773	vacuole	5	5	1	1	g15457;g12208;g11098;g2080;g16101
GO:0005783	endoplasmic reticulum	5	5	1	1	g10417;g2595;g15457;g1160;g15452
GO:0005829	cytosol	5	5	1	1	g16047;g15455;g5719;g16006;g15889
GO:0005938	cell cortex	5	5	1	1	g637;g2380;g7746;g3250;g3247
GO:0030312	external encapsulating structure	5	5	1	1	g11542;g11324;g8772;g13874;g13864
GO:0044448	cell cortex part	5	5	1	1	g637;g2380;g7746;g3250;g3247
GO:0061695	transferase complex, transferring phosphorus-containing groups	5	5	1	1	g2556;g6087;g2488;g3810;g15889
GO:0099568	cytoplasmic region	5	5	1	1	g637;g2380;g7746;g3250;g3247
GO:0000428	DNA-directed RNA polymerase complex	4	4	1	1	g2556;g6087;g2488;g15889
GO:0000775	chromosome, centromeric region	4	4	1	1	g672;g11225;g16122;g2488
GO:0000785	chromatin	4	4	1	1	g4217;g2756;g16122;g2488
GO:0005667	transcription factor complex	4	4	1	1	g2556;g15889;g3697;g9010
GO:0005740	mitochondrial envelope	4	4	1	1	g6962;g7203;g475;g795
GO:0005759	mitochondrial matrix	4	4	1	1	g475;g8625;g5674;g3988
GO:0005774	vacuolar membrane	4	4	1	1	g15457;g12208;g2080;g16101
GO:0015630	microtubule cytoskeleton	4	4	1	1	g7564;g4023;g11225;g3337
GO:0016591	DNA-directed RNA polymerase II, holoenzyme	4	4	1	1	g2556;g6087;g2488;g15889
GO:0030880	RNA polymerase complex	4	4	1	1	g2556;g6087;g2488;g15889
GO:0031966	mitochondrial membrane	4	4	1	1	g6962;g7203;g475;g795
GO:0032993	protein-DNA complex	4	4	1	1	g4217;g3788;g15889;g3810
GO:0035770	ribonucleoprotein granule	4	4	1	1	g4289;g7449;g5903;g2488
GO:0036464	cytoplasmic ribonucleoprotein granule	4	4	1	1	g4289;g7449;g5903;g2488
GO:0044431	Golgi apparatus part	4	4	1	1	g4211;g9797;g7416;g7665
GO:0044437	vacuolar part	4	4	1	1	g15457;g12208;g2080;g16101
GO:0044459	plasma membrane part	4	4	1	1	g10823;g918;g4153;g15911
GO:0044798	nuclear transcription factor complex	4	4	1	1	g2556;g15889;g3697;g9010
GO:0055029	nuclear DNA-directed RNA polymerase complex	4	4	1	1	g2556;g6087;g2488;g15889
GO:0090575	RNA polymerase II transcription factor complex	4	4	1	1	g2556;g15889;g3697;g9010
GO:0098687	chromosomal region	4	4	1	1	g672;g11225;g16122;g2488
GO:0098796	membrane protein complex	4	4	1	1	g10823;g12208;g7665;g795
GO:0000145	exocyst	3	3	1	1	g7746;g3250;g3247
GO:0000322	storage vacuole	3	3	1	1	g11098;g2080;g16101
GO:0000323	lytic vacuole	3	3	1	1	g11098;g2080;g16101
GO:0000324	fungal-type vacuole	3	3	1	1	g11098;g2080;g16101
GO:0000790	nuclear chromatin	3	3	1	1	g2756;g16122;g2488
GO:0000793	condensed chromosome	3	3	1	1	g16122;g13214;g11225
GO:0005635	nuclear envelope	3	3	1	1	g5997;g15306;g3445
GO:0005730	nucleolus	3	3	1	1	g7282;g6593;g5719
GO:0005743	mitochondrial inner membrane	3	3	1	1	g7203;g475;g795
GO:0005768	endosome	3	3	1	1	g13911;g918;g7665
GO:0010494	cytoplasmic stress granule	3	3	1	1	g7449;g5903;g2488
GO:0015629	actin cytoskeleton	3	3	1	1	g637;g2380;g5023
GO:0019866	organelle inner membrane	3	3	1	1	g7203;g475;g795
GO:0044432	endoplasmic reticulum part	3	3	1	1	g10417;g1160;g15452
GO:0000109	nucleotide-excision repair complex	2	2	1	1	g15889;g3810
GO:0000139	Golgi membrane	2	2	1	1	g4211;g7665
GO:0000178	exosome (RNase complex)	2	2	1	1	g7932;g4970
GO:0000329	fungal-type vacuole membrane	2	2	1	1	g2080;g16101
GO:0000794	condensed nuclear chromosome	2	2	1	1	g16122;g11225
GO:0005576	extracellular region	2	2	1	1	g11542;g11324
GO:0005643	nuclear pore	2	2	1	1	g5997;g15306
GO:0005657	replication fork	2	2	1	1	g5719;g3810
GO:0005681	spliceosomal complex	2	2	1	1	g4782;g6125
GO:0005684	U2-type spliceosomal complex	2	2	1	1	g4782;g6125
GO:0005789	endoplasmic reticulum membrane	2	2	1	1	g10417;g1160
GO:0005798	Golgi-associated vesicle	2	2	1	1	g9797;g7665
GO:0005819	spindle	2	2	1	1	g7564;g11225
GO:0005852	eukaryotic translation initiation factor 3 complex	2	2	1	1	g12573;g4832
GO:0005874	microtubule	2	2	1	1	g7564;g4023
GO:0005887	integral component of plasma membrane	2	2	1	1	g4153;g15911
GO:0009277	fungal-type cell wall	2	2	1	1	g11542;g11324
GO:0009337	sulfite reductase complex (NADPH)	2	2	1	1	g7449;g5903
GO:0016023	cytoplasmic, membrane-bounded vesicle	2	2	1	1	g9797;g7665
GO:0016282	eukaryotic 43S preinitiation complex	2	2	1	1	g12573;g4832
GO:0016459	myosin complex	2	2	1	1	g5023;g2380
GO:0030135	coated vesicle	2	2	1	1	g9797;g7665
GO:0030479	actin cortical patch	2	2	1	1	g637;g2380
GO:0030532	small nuclear ribonucleoprotein complex	2	2	1	1	g3822;g4782
GO:0030684	preribosome	2	2	1	1	g2324;g7282
GO:0030863	cortical cytoskeleton	2	2	1	1	g637;g2380
GO:0030864	cortical actin cytoskeleton	2	2	1	1	g637;g2380
GO:0031226	intrinsic component of plasma membrane	2	2	1	1	g4153;g15911
GO:0031300	intrinsic component of organelle membrane	2	2	1	1	g15457;g10417
GO:0031410	cytoplasmic vesicle	2	2	1	1	g9797;g7665
GO:0031982	vesicle	2	2	1	1	g9797;g7665
GO:0031988	membrane-bounded vesicle	2	2	1	1	g9797;g7665
GO:0033290	eukaryotic 48S preinitiation complex	2	2	1	1	g12573;g4832
GO:0034708	methyltransferase complex	2	2	1	1	g9010;g8536
GO:0035097	histone methyltransferase complex	2	2	1	1	g9010;g8536
GO:0038201	TOR complex	2	2	1	1	g1491;g2080
GO:0042175	nuclear outer membrane-endoplasmic reticulum membrane network	2	2	1	1	g10417;g1160
GO:0043596	nuclear replication fork	2	2	1	1	g5719;g3810
GO:0044445	cytosolic part	2	2	1	1	g16047;g15455
GO:0044815	DNA packaging complex	2	2	1	1	g4217;g13214
GO:0061645	endocytic patch	2	2	1	1	g637;g2380
GO:0070993	translation preinitiation complex	2	2	1	1	g12573;g4832
GO:0097525	spliceosomal snRNP complex	2	2	1	1	g3822;g4782
GO:0097550	transcriptional preinitiation complex	2	2	1	1	g3788;g15889
GO:0098852	lytic vacuole membrane	2	2	1	1	g2080;g16101
GO:0099512	supramolecular fiber	2	2	1	1	g7564;g4023
GO:0099513	polymeric cytoskeletal fiber	2	2	1	1	g7564;g4023
GO:1990391	DNA repair complex	2	2	1	1	g15889;g3810
GO:0000112	nucleotide-excision repair factor 3 complex	1	1	1	1	g15889
GO:0000151	ubiquitin ligase complex	1	1	1	1	g11042
GO:0000313	organellar ribosome	1	1	1	1	g475
GO:0000439	core TFIIH complex	1	1	1	1	g15889
GO:0000502	proteasome complex	1	1	1	1	g2663
GO:0000776	kinetochore	1	1	1	1	g11225
GO:0000777	condensed chromosome kinetochore	1	1	1	1	g11225
GO:0000778	condensed nuclear chromosome kinetochore	1	1	1	1	g11225
GO:0000779	condensed chromosome, centromeric region	1	1	1	1	g11225
GO:0000780	condensed nuclear chromosome, centromeric region	1	1	1	1	g11225
GO:0000786	nucleosome	1	1	1	1	g4217
GO:0000792	heterochromatin	1	1	1	1	g2488
GO:0000795	synaptonemal complex	1	1	1	1	g16122
GO:0000796	condensin complex	1	1	1	1	g13214
GO:0000922	spindle pole	1	1	1	1	g7564
GO:0000932	cytoplasmic mRNA processing body	1	1	1	1	g4289
GO:0000940	condensed chromosome outer kinetochore	1	1	1	1	g11225
GO:0000942	condensed nuclear chromosome outer kinetochore	1	1	1	1	g11225
GO:0000943	retrotransposon nucleocapsid	1	1	1	1	g11946
GO:0001405	presequence translocase-associated import motor	1	1	1	1	g795
GO:0005665	DNA-directed RNA polymerase II, core complex	1	1	1	1	g2488
GO:0005669	transcription factor TFIID complex	1	1	1	1	g2556
GO:0005675	holo TFIIH complex	1	1	1	1	g15889
GO:0005686	U2 snRNP	1	1	1	1	g4782
GO:0005720	nuclear heterochromatin	1	1	1	1	g2488
GO:0005721	pericentric heterochromatin	1	1	1	1	g2488
GO:0005741	mitochondrial outer membrane	1	1	1	1	g6962
GO:0005744	mitochondrial inner membrane presequence translocase complex	1	1	1	1	g795
GO:0005761	mitochondrial ribosome	1	1	1	1	g475
GO:0005770	late endosome	1	1	1	1	g13911
GO:0005801	cis-Golgi network	1	1	1	1	g4211
GO:0005802	trans-Golgi network	1	1	1	1	g4211
GO:0005811	lipid particle	1	1	1	1	g4365
GO:0005834	heterotrimeric G-protein complex	1	1	1	1	g10823
GO:0005835	fatty acid synthase complex	1	1	1	1	g15455
GO:0005851	eukaryotic translation initiation factor 2B complex	1	1	1	1	g904
GO:0005875	microtubule associated complex	1	1	1	1	g7564
GO:0005885	Arp2/3 protein complex	1	1	1	1	g637
GO:0005956	protein kinase CK2 complex	1	1	1	1	g7590
GO:0008023	transcription elongation factor complex	1	1	1	1	g6087
GO:0008622	epsilon DNA polymerase complex	1	1	1	1	g3810
GO:0009331	glycerol-3-phosphate dehydrogenase complex	1	1	1	1	g14381
GO:0009898	cytoplasmic side of plasma membrane	1	1	1	1	g10823
GO:0010008	endosome membrane	1	1	1	1	g13911
GO:0012506	vesicle membrane	1	1	1	1	g7665
GO:0012510	trans-Golgi network transport vesicle membrane	1	1	1	1	g7665
GO:0016442	RISC complex	1	1	1	1	g5803
GO:0016469	proton-transporting two-sector ATPase complex	1	1	1	1	g12208
GO:0016593	Cdc73/Paf1 complex	1	1	1	1	g6087
GO:0019005	SCF ubiquitin ligase complex	1	1	1	1	g11042
GO:0019867	outer membrane	1	1	1	1	g6962
GO:0019897	extrinsic component of plasma membrane	1	1	1	1	g10823
GO:0019898	extrinsic component of membrane	1	1	1	1	g10823
GO:0030008	TRAPP complex	1	1	1	1	g5681
GO:0030117	membrane coat	1	1	1	1	g7665
GO:0030118	clathrin coat	1	1	1	1	g7665
GO:0030119	AP-type membrane coat adaptor complex	1	1	1	1	g7665
GO:0030120	vesicle coat	1	1	1	1	g7665
GO:0030121	AP-1 adaptor complex	1	1	1	1	g7665
GO:0030125	clathrin vesicle coat	1	1	1	1	g7665
GO:0030130	clathrin coat of trans-Golgi network vesicle	1	1	1	1	g7665
GO:0030131	clathrin adaptor complex	1	1	1	1	g7665
GO:0030133	transport vesicle	1	1	1	1	g7665
GO:0030136	clathrin-coated vesicle	1	1	1	1	g7665
GO:0030137	COPI-coated vesicle	1	1	1	1	g9797
GO:0030140	trans-Golgi network transport vesicle	1	1	1	1	g7665
GO:0030176	integral component of endoplasmic reticulum membrane	1	1	1	1	g10417
GO:0030658	transport vesicle membrane	1	1	1	1	g7665
GO:0030659	cytoplasmic vesicle membrane	1	1	1	1	g7665
GO:0030660	Golgi-associated vesicle membrane	1	1	1	1	g7665
GO:0030662	coated vesicle membrane	1	1	1	1	g7665
GO:0030665	clathrin-coated vesicle membrane	1	1	1	1	g7665
GO:0030687	preribosome, large subunit precursor	1	1	1	1	g7282
GO:0030870	Mre11 complex	1	1	1	1	g10820
GO:0030894	replisome	1	1	1	1	g3810
GO:0030907	MBF transcription complex	1	1	1	1	g3697
GO:0031011	Ino80 complex	1	1	1	1	g2756
GO:0031227	intrinsic component of endoplasmic reticulum membrane	1	1	1	1	g10417
GO:0031234	extrinsic component of cytoplasmic side of plasma membrane	1	1	1	1	g10823
GO:0031298	replication fork protection complex	1	1	1	1	g5719
GO:0031301	integral component of organelle membrane	1	1	1	1	g10417
GO:0031310	intrinsic component of vacuolar membrane	1	1	1	1	g15457
GO:0031332	RNAi effector complex	1	1	1	1	g5803
GO:0031461	cullin-RING ubiquitin ligase complex	1	1	1	1	g11042
GO:0031618	nuclear pericentric heterochromatin	1	1	1	1	g2488
GO:0031902	late endosome membrane	1	1	1	1	g13911
GO:0031931	TORC1 complex	1	1	1	1	g2080
GO:0031965	nuclear membrane	1	1	1	1	g3445
GO:0031968	organelle outer membrane	1	1	1	1	g6962
GO:0031984	organelle subcompartment	1	1	1	1	g4211
GO:0032040	small-subunit processome	1	1	1	1	g2324
GO:0032153	cell division site	1	1	1	1	g918
GO:0032588	trans-Golgi network membrane	1	1	1	1	g4211
GO:0032806	carboxy-terminal domain protein kinase complex	1	1	1	1	g15889
GO:0033106	cis-Golgi network membrane	1	1	1	1	g4211
GO:0033176	proton-transporting V-type ATPase complex	1	1	1	1	g12208
GO:0033177	proton-transporting two-sector ATPase complex, proton-transporting domain	1	1	1	1	g12208
GO:0033179	proton-transporting V-type ATPase, V0 domain	1	1	1	1	g12208
GO:0033202	DNA helicase complex	1	1	1	1	g2756
GO:0033254	vacuolar transporter chaperone complex	1	1	1	1	g15457
GO:0034399	nuclear periphery	1	1	1	1	g3857
GO:0034506	chromosome, centromeric core domain	1	1	1	1	g16122
GO:0035327	transcriptionally active chromatin	1	1	1	1	g16122
GO:0035861	site of double-strand break	1	1	1	1	g672
GO:0042575	DNA polymerase complex	1	1	1	1	g3810
GO:0042729	DASH complex	1	1	1	1	g11225
GO:0043601	nuclear replisome	1	1	1	1	g3810
GO:0044433	cytoplasmic vesicle part	1	1	1	1	g7665
GO:0044440	endosomal part	1	1	1	1	g13911
GO:0044455	mitochondrial membrane part	1	1	1	1	g795
GO:0044665	MLL1/2 complex	1	1	1	1	g9010
GO:0044853	plasma membrane raft	1	1	1	1	g918
GO:0045121	membrane raft	1	1	1	1	g918
GO:0046540	U4/U6 x U5 tri-snRNP complex	1	1	1	1	g3822
GO:0048188	Set1C/COMPASS complex	1	1	1	1	g8536
GO:0048475	coated membrane	1	1	1	1	g7665
GO:0051286	cell tip	1	1	1	1	g918
GO:0070603	SWI/SNF superfamily-type complex	1	1	1	1	g2756
GO:0070916	inositol phosphoceramide synthase complex	1	1	1	1	g7416
GO:0071006	U2-type catalytic step 1 spliceosome	1	1	1	1	g6125
GO:0071012	catalytic step 1 spliceosome	1	1	1	1	g6125
GO:0071014	post-mRNA release spliceosomal complex	1	1	1	1	g4782
GO:0071339	MLL1 complex	1	1	1	1	g9010
GO:0072686	mitotic spindle	1	1	1	1	g11225
GO:0097047	DNA replication termination region	1	1	1	1	g16122
GO:0097346	INO80-type complex	1	1	1	1	g2756
GO:0097361	CIA complex	1	1	1	1	g16047
GO:0097526	spliceosomal tri-snRNP complex	1	1	1	1	g3822
GO:0098552	side of membrane	1	1	1	1	g10823
GO:0098562	cytoplasmic side of membrane	1	1	1	1	g10823
GO:0098589	membrane region	1	1	1	1	g918
GO:0098590	plasma membrane region	1	1	1	1	g918
GO:0098791	Golgi subcompartment	1	1	1	1	g4211
GO:0098797	plasma membrane protein complex	1	1	1	1	g10823
GO:0098798	mitochondrial protein complex	1	1	1	1	g795
GO:0098800	inner mitochondrial membrane protein complex	1	1	1	1	g795
GO:0098857	membrane microdomain	1	1	1	1	g918
GO:1902554	serine/threonine protein kinase complex	1	1	1	1	g15889
GO:1902911	protein kinase complex	1	1	1	1	g15889
GO:1990204	oxidoreductase complex	1	1	1	1	g14381
