# Supplementary material for: A Comprehensive Assessment of Ultraviolet-Radiation-Induced Mutations in Flammulina filiformis Using Whole-Genome Resequencing
Source: MDPI journal article supplement (doi:10.3390/jof10030228), 2024-03-20
Supplement: s1 [file out.F.xls]

GO ID	Description	GeneRatio (493)	BgRatio (493)	pvalue	fdr	geneID
GO:0003824	catalytic activity	361	361	1	1	g7709;g10811;g15889;g1347;g5719;g4623;g9478;g4989;g2857;g2579;g16023;g15455;g5755;g7134;g3128;g12412;g12080;g10901;g7777;g5593;g15207;g7453;g3988;g1559;g2697;g6194;g3416;g9793;g9745;g9261;g8973;g7590;g7095;g5786;g5462;g5344;g4041;g3911;g3037;g2603;g2491;g2186;g16276;g16075;g15244;g1438;g11145;g3987;g13424;g10915;g7614;g7267;g5191;g4829;g4821;g4337;g4211;g3429;g3374;g16296;g1577;g15739;g12710;g123…
GO:0005488	binding	282	282	1	1	g1008;g2477;g11042;g1635;g10811;g8679;g7564;g7432;g5932;g5922;g5719;g5393;g4671;g4319;g4217;g4094;g3810;g3697;g3128;g2807;g2488;g2464;g221;g16122;g16063;g16055;g16;g15889;g15316;g795;g3788;g1559;g5346;g3857;g278;g1636;g2663;g6194;g7729;g10182;g7449;g5903;g7249;g4571;g1685;g15104;g4832;g7073;g7709;g16161;g14774;g1233;g7908;g7873;g746;g7395;g7380;g7295;g6342;g6125;g5912;g5001;g323;g2571;g2513;g2313…
GO:0097159	organic cyclic compound binding	187	187	1	1	g11042;g1635;g10811;g8679;g7564;g7432;g5932;g5922;g5719;g5393;g4671;g4319;g4217;g4094;g3810;g3697;g3128;g2807;g2488;g2464;g221;g16122;g16063;g16055;g16;g15889;g15316;g1559;g5346;g3857;g278;g1636;g7449;g5903;g7249;g4832;g7073;g7709;g16161;g14774;g1233;g7908;g7873;g746;g7395;g7380;g7295;g6342;g6125;g5912;g5001;g323;g2571;g2513;g2313;g2268;g1774;g15358;g1468;g1377;g12225;g15421;g918;g7307;g4305;g398…
GO:1901363	heterocyclic compound binding	187	187	1	1	g11042;g1635;g10811;g8679;g7564;g7432;g5932;g5922;g5719;g5393;g4671;g4319;g4217;g4094;g3810;g3697;g3128;g2807;g2488;g2464;g221;g16122;g16063;g16055;g16;g15889;g15316;g1559;g5346;g3857;g278;g1636;g6194;g7729;g10182;g7449;g5903;g7249;g4832;g7073;g7709;g16161;g14774;g1233;g7908;g7873;g746;g7395;g7380;g7295;g6342;g6125;g5912;g5001;g323;g2571;g2513;g2313;g2268;g1774;g15358;g1468;g1377;g12225;g15421;g9…
GO:0043167	ion binding	171	171	1	1	g1559;g5346;g3857;g278;g1636;g7073;g2477;g5803;g5515;g4643;g9820;g9797;g8545;g7931;g7432;g7134;g6579;g504;g4762;g4671;g4421;g3788;g3128;g2983;g2855;g2509;g2322;g2139;g207;g2060;g1685;g16006;g15356;g15134;g14466;g1164;g11476;g1138;g11240;g11221;g10711;g1008;g1884;g2399;g918;g7307;g4305;g3988;g3987;g2888;g4623;g8666;g4821;g4720;g10182;g8245;g11984;g11950;g4580;g380;g4289;g4061;g3034;g15455;g13644;g…
GO:0016787	hydrolase activity	135	135	1	1	g7709;g10811;g15889;g1347;g7777;g5593;g15207;g2697;g5023;g2380;g218;g8896;g2194;g1333;g5803;g2764;g10152;g7594;g6579;g11330;g4571;g9166;g6286;g5886;g4623;g174;g1715;g12204;g11016;g470;g16122;g7757;g3911;g5674;g12146;g1635;g1233;g8810;g6125;g2571;g2313;g13276;g672;g3115;g1539;g7440;g12113;g9946;g9211;g8679;g8527;g7810;g760;g7564;g6593;g5424;g5393;g5024;g4792;g4374;g4193;g4116;g3949;g3663;g2953;g26…
GO:0016740	transferase activity	115	115	1	1	g4623;g15455;g5755;g7134;g3128;g12412;g12080;g10901;g3988;g6194;g3416;g9793;g9745;g9261;g8973;g7590;g7095;g5786;g5462;g5344;g4041;g3911;g3037;g2603;g2491;g2186;g16276;g16075;g15244;g1438;g11145;g3987;g13424;g10915;g7614;g7267;g5191;g4829;g4821;g4337;g4211;g3429;g3374;g16296;g1577;g15739;g12710;g1234;g12130;g11270;g10182;g5678;g16006;g7594;g1160;g14321;g15379;g8896;g7203;g7416;g6334;g15457;g918;g2…
GO:0036094	small molecule binding	114	114	1	1	g1559;g5346;g3857;g278;g1636;g7449;g5903;g7249;g7073;g7432;g2488;g795;g4665;g3274;g2807;g15480;g7709;g6095;g5803;g5755;g4286;g2194;g1635;g15156;g1233;g11554;g11041;g10811;g9820;g9743;g8930;g8679;g861;g7749;g7707;g7134;g672;g6410;g637;g6291;g6125;g6012;g5980;g5922;g5694;g5674;g562;g5564;g5393;g5023;g4792;g4773;g4762;g4232;g4061;g3949;g3128;g3115;g3034;g2610;g2571;g2509;g2380;g2357;g2313;g2268;g222…
GO:0000166	nucleotide binding	112	112	1	1	g1559;g5346;g3857;g278;g1636;g7449;g5903;g7249;g7073;g795;g4665;g3274;g2807;g15480;g7709;g6095;g5803;g5755;g4286;g2194;g1635;g15156;g1233;g11554;g11041;g10811;g9820;g9743;g8930;g8679;g861;g7749;g7707;g7134;g672;g6410;g637;g6291;g6125;g6012;g5980;g5922;g5694;g5674;g562;g5564;g5393;g5023;g4792;g4773;g4762;g4232;g4061;g3949;g3128;g3115;g3034;g2610;g2571;g2509;g2380;g2357;g2313;g2268;g2229;g16122;g16…
GO:1901265	nucleoside phosphate binding	112	112	1	1	g1559;g5346;g3857;g278;g1636;g7449;g5903;g7249;g7073;g795;g4665;g3274;g2807;g15480;g7709;g6095;g5803;g5755;g4286;g2194;g1635;g15156;g1233;g11554;g11041;g10811;g9820;g9743;g8930;g8679;g861;g7749;g7707;g7134;g672;g6410;g637;g6291;g6125;g6012;g5980;g5922;g5694;g5674;g562;g5564;g5393;g5023;g4792;g4773;g4762;g4232;g4061;g3949;g3128;g3115;g3034;g2610;g2571;g2509;g2380;g2357;g2313;g2268;g2229;g16122;g16…
GO:0043168	anion binding	105	105	1	1	g1559;g5346;g3857;g278;g1636;g7073;g2477;g1884;g918;g7307;g4305;g3988;g3987;g2888;g7185;g2883;g4665;g3274;g2807;g15480;g7709;g6095;g5803;g5755;g4286;g2194;g1635;g15156;g1233;g11554;g11041;g10811;g9820;g9743;g8930;g8679;g861;g7749;g7707;g7134;g672;g6410;g637;g6291;g6125;g6012;g5980;g5922;g5694;g5674;g562;g5564;g5393;g5023;g4792;g4773;g4762;g4232;g4061;g3949;g3128;g3115;g3034;g2610;g2571;g2509;g238…
GO:0097367	carbohydrate derivative binding	87	87	1	1	g7432;g2488;g7709;g6095;g5803;g5755;g4286;g2194;g1635;g15156;g1233;g11554;g11041;g10811;g9820;g9743;g8930;g8679;g861;g7749;g7707;g7134;g672;g6410;g637;g6291;g6125;g6012;g5980;g5922;g5694;g5674;g562;g5564;g5393;g5023;g4792;g4773;g4762;g4232;g4061;g3949;g3128;g3115;g3034;g2610;g2571;g2509;g2380;g2357;g2313;g2268;g2229;g16122;g16101;g16006;g15889;g15829;g1571;g15316;g1468;g1467;g14321;g1333;g13321;g…
GO:0032553	ribonucleotide binding	85	85	1	1	g7709;g6095;g5803;g5755;g4286;g2194;g1635;g15156;g1233;g11554;g11041;g10811;g9820;g9743;g8930;g8679;g861;g7749;g7707;g7134;g672;g6410;g637;g6291;g6125;g6012;g5980;g5922;g5694;g5674;g562;g5564;g5393;g5023;g4792;g4773;g4762;g4232;g4061;g3949;g3128;g3115;g3034;g2610;g2571;g2509;g2380;g2357;g2313;g2268;g2229;g16122;g16101;g16006;g15889;g15829;g1571;g15316;g1468;g1467;g14321;g1333;g13321;g12928;g12412…
GO:0003676	nucleic acid binding	84	84	1	1	g11042;g1635;g10811;g8679;g7564;g7432;g5932;g5922;g5719;g5393;g4671;g4319;g4217;g4094;g3810;g3697;g3128;g2807;g2488;g2464;g221;g16122;g16063;g16055;g16;g15889;g15316;g4832;g7709;g16161;g14774;g1233;g7908;g7873;g746;g7395;g7380;g7295;g6342;g6125;g5912;g5001;g323;g2571;g2513;g2313;g2268;g1774;g15358;g1468;g1377;g12225;g15421;g2194;g891;g8536;g7932;g6281;g6254;g4305;g4289;g4061;g319;g3076;g2199;g133…
GO:0016491	oxidoreductase activity	83	83	1	1	g9478;g4989;g2857;g2579;g16023;g15455;g1559;g14291;g278;g1636;g5849;g7388;g2454;g1994;g1541;g15134;g5806;g4286;g15420;g1110;g4571;g8245;g11984;g11950;g9820;g450;g13590;g10839;g9823;g868;g867;g8550;g7931;g5833;g5634;g4665;g4637;g2855;g2807;g244;g2399;g239;g2139;g207;g16213;g16211;g15680;g15673;g15609;g15485;g15123;g14466;g1164;g11476;g1138;g11270;g11240;g10489;g10488;g10485;g10204;g1008;g3274;g154…
GO:0001882	nucleoside binding	82	82	1	1	g7432;g2488;g7709;g6095;g5803;g5755;g4286;g2194;g1635;g15156;g1233;g11554;g11041;g10811;g9820;g9743;g8930;g8679;g861;g7749;g7707;g7134;g672;g6410;g637;g6291;g6125;g6012;g5980;g5922;g5694;g5674;g562;g5564;g5393;g5023;g4792;g4773;g4762;g4232;g4061;g3949;g3128;g3115;g3034;g2610;g2571;g2509;g2380;g2357;g2313;g2268;g2229;g16122;g16101;g16006;g15889;g15829;g1571;g15316;g1468;g1467;g14321;g1333;g13321;g…
GO:0017076	purine nucleotide binding	81	81	1	1	g795;g7709;g6095;g5803;g5755;g4286;g2194;g1635;g15156;g1233;g11554;g11041;g10811;g9820;g9743;g8930;g8679;g861;g7749;g7707;g7134;g672;g6410;g637;g6291;g6125;g6012;g5980;g5922;g5694;g5674;g562;g5564;g5393;g5023;g4792;g4773;g4762;g4232;g4061;g3949;g3128;g3115;g3034;g2610;g2571;g2509;g2380;g2357;g2313;g2268;g2229;g16122;g16101;g16006;g15889;g15829;g1571;g15316;g1468;g1467;g14321;g1333;g13321;g12928;g…
GO:0032549	ribonucleoside binding	81	81	1	1	g2488;g7709;g6095;g5803;g5755;g4286;g2194;g1635;g15156;g1233;g11554;g11041;g10811;g9820;g9743;g8930;g8679;g861;g7749;g7707;g7134;g672;g6410;g637;g6291;g6125;g6012;g5980;g5922;g5694;g5674;g562;g5564;g5393;g5023;g4792;g4773;g4762;g4232;g4061;g3949;g3128;g3115;g3034;g2610;g2571;g2509;g2380;g2357;g2313;g2268;g2229;g16122;g16101;g16006;g15889;g15829;g1571;g15316;g1468;g1467;g14321;g1333;g13321;g12928;…
GO:0001883	purine nucleoside binding	80	80	1	1	g7709;g6095;g5803;g5755;g4286;g2194;g1635;g15156;g1233;g11554;g11041;g10811;g9820;g9743;g8930;g8679;g861;g7749;g7707;g7134;g672;g6410;g637;g6291;g6125;g6012;g5980;g5922;g5694;g5674;g562;g5564;g5393;g5023;g4792;g4773;g4762;g4232;g4061;g3949;g3128;g3115;g3034;g2610;g2571;g2509;g2380;g2357;g2313;g2268;g2229;g16122;g16101;g16006;g15889;g15829;g1571;g15316;g1468;g1467;g14321;g1333;g13321;g12928;g12412…
GO:0032550	purine ribonucleoside binding	80	80	1	1	g7709;g6095;g5803;g5755;g4286;g2194;g1635;g15156;g1233;g11554;g11041;g10811;g9820;g9743;g8930;g8679;g861;g7749;g7707;g7134;g672;g6410;g637;g6291;g6125;g6012;g5980;g5922;g5694;g5674;g562;g5564;g5393;g5023;g4792;g4773;g4762;g4232;g4061;g3949;g3128;g3115;g3034;g2610;g2571;g2509;g2380;g2357;g2313;g2268;g2229;g16122;g16101;g16006;g15889;g15829;g1571;g15316;g1468;g1467;g14321;g1333;g13321;g12928;g12412…
GO:0032555	purine ribonucleotide binding	80	80	1	1	g7709;g6095;g5803;g5755;g4286;g2194;g1635;g15156;g1233;g11554;g11041;g10811;g9820;g9743;g8930;g8679;g861;g7749;g7707;g7134;g672;g6410;g637;g6291;g6125;g6012;g5980;g5922;g5694;g5674;g562;g5564;g5393;g5023;g4792;g4773;g4762;g4232;g4061;g3949;g3128;g3115;g3034;g2610;g2571;g2509;g2380;g2357;g2313;g2268;g2229;g16122;g16101;g16006;g15889;g15829;g1571;g15316;g1468;g1467;g14321;g1333;g13321;g12928;g12412…
GO:0035639	purine ribonucleoside triphosphate binding	80	80	1	1	g7709;g6095;g5803;g5755;g4286;g2194;g1635;g15156;g1233;g11554;g11041;g10811;g9820;g9743;g8930;g8679;g861;g7749;g7707;g7134;g672;g6410;g637;g6291;g6125;g6012;g5980;g5922;g5694;g5674;g562;g5564;g5393;g5023;g4792;g4773;g4762;g4232;g4061;g3949;g3128;g3115;g3034;g2610;g2571;g2509;g2380;g2357;g2313;g2268;g2229;g16122;g16101;g16006;g15889;g15829;g1571;g15316;g1468;g1467;g14321;g1333;g13321;g12928;g12412…
GO:0043169	cation binding	79	79	1	1	g5803;g5515;g4643;g9820;g9797;g8545;g7931;g7432;g7134;g6579;g504;g4762;g4671;g4421;g3857;g3788;g3128;g2983;g2855;g2509;g2322;g2139;g207;g2060;g1685;g16006;g15356;g15134;g14466;g1164;g11476;g1138;g11240;g11221;g10711;g1008;g2399;g4623;g8245;g11984;g11950;g4580;g380;g4289;g4061;g3034;g15455;g13644;g11145;g450;g4833;g6095;g4286;g1233;g918;g8806;g7873;g7564;g7395;g7295;g5932;g5634;g4653;g3810;g3115;g…
GO:0046872	metal ion binding	78	78	1	1	g5803;g5515;g4643;g9820;g9797;g8545;g7931;g7432;g7134;g6579;g504;g4762;g4671;g4421;g3857;g3788;g3128;g2983;g2855;g2509;g2322;g2139;g207;g2060;g1685;g16006;g15356;g15134;g14466;g1164;g11476;g1138;g11240;g11221;g10711;g1008;g2399;g8245;g11984;g11950;g4580;g380;g4289;g4061;g3034;g15455;g13644;g11145;g450;g4833;g6095;g4286;g1233;g918;g8806;g7873;g7564;g7395;g7295;g5932;g5634;g4653;g3810;g3115;g2596;g…
GO:0030554	adenyl nucleotide binding	73	73	1	1	g795;g7709;g6095;g5803;g5755;g4286;g2194;g1635;g15156;g1233;g11554;g11041;g10811;g9820;g9743;g8930;g8679;g861;g7749;g7707;g7134;g672;g6410;g637;g6291;g6125;g6012;g5980;g5922;g5694;g5674;g562;g5564;g5393;g5023;g4792;g4773;g4762;g4232;g4061;g3949;g3128;g3115;g3034;g2610;g2571;g2509;g2380;g2357;g2313;g2268;g2229;g16122;g16101;g16006;g15889;g15829;g1571;g15316;g1468;g1467;g14321;g1333;g13321;g12928;g…
GO:0005524	ATP binding	72	72	1	1	g7709;g6095;g5803;g5755;g4286;g2194;g1635;g15156;g1233;g11554;g11041;g10811;g9820;g9743;g8930;g8679;g861;g7749;g7707;g7134;g672;g6410;g637;g6291;g6125;g6012;g5980;g5922;g5694;g5674;g562;g5564;g5393;g5023;g4792;g4773;g4762;g4232;g4061;g3949;g3128;g3115;g3034;g2610;g2571;g2509;g2380;g2357;g2313;g2268;g2229;g16122;g16101;g16006;g15889;g15829;g1571;g15316;g1468;g1467;g14321;g1333;g13321;g12928;g12412…
GO:0032559	adenyl ribonucleotide binding	72	72	1	1	g7709;g6095;g5803;g5755;g4286;g2194;g1635;g15156;g1233;g11554;g11041;g10811;g9820;g9743;g8930;g8679;g861;g7749;g7707;g7134;g672;g6410;g637;g6291;g6125;g6012;g5980;g5922;g5694;g5674;g562;g5564;g5393;g5023;g4792;g4773;g4762;g4232;g4061;g3949;g3128;g3115;g3034;g2610;g2571;g2509;g2380;g2357;g2313;g2268;g2229;g16122;g16101;g16006;g15889;g15829;g1571;g15316;g1468;g1467;g14321;g1333;g13321;g12928;g12412…
GO:0016772	transferase activity, transferring phosphorus-containing groups	55	55	1	1	g5755;g7134;g3128;g12412;g12080;g10901;g6194;g3416;g9793;g9745;g9261;g8973;g7590;g7095;g5786;g5462;g5344;g4041;g3911;g3037;g2603;g2491;g2186;g16276;g16075;g15244;g1438;g11145;g5678;g16006;g14321;g15457;g15829;g760;g16101;g5803;g12258;g9743;g7711;g4311;g2610;g2229;g1571;g1467;g12159;g15455;g2488;g16055;g8930;g7432;g3810;g9820;g904;g3291;g12200
GO:0016817	hydrolase activity, acting on acid anhydrides	46	46	1	1	g10811;g15889;g5023;g2380;g2194;g1333;g5674;g12146;g7709;g1635;g1233;g8810;g6125;g2571;g2313;g13276;g672;g9578;g4773;g10820;g16122;g5755;g8648;g475;g4023;g2852;g15636;g10823;g5922;g2268;g15316;g4286;g13321;g1203;g13019;g15156;g6410;g602;g5980;g5694;g562;g5564;g4232;g3034;g2357;g11098
GO:0016818	hydrolase activity, acting on acid anhydrides, in phosphorus-containing anhydrides	46	46	1	1	g10811;g15889;g5023;g2380;g2194;g1333;g5674;g12146;g7709;g1635;g1233;g8810;g6125;g2571;g2313;g13276;g672;g9578;g4773;g10820;g16122;g5755;g8648;g475;g4023;g2852;g15636;g10823;g5922;g2268;g15316;g4286;g13321;g1203;g13019;g15156;g6410;g602;g5980;g5694;g562;g5564;g4232;g3034;g2357;g11098
GO:0016301	kinase activity	45	45	1	1	g5755;g7134;g3128;g12412;g12080;g10901;g6194;g3416;g9793;g9745;g9261;g8973;g7590;g7095;g5786;g5462;g5344;g4041;g3911;g3037;g2603;g2491;g2186;g16276;g16075;g15244;g1438;g11145;g14321;g15457;g15829;g760;g16101;g5803;g12258;g9743;g7711;g4311;g2610;g2229;g1571;g1467;g12159;g8930;g9820
GO:0016462	pyrophosphatase activity	43	43	1	1	g10811;g15889;g5023;g2380;g2194;g1333;g5674;g12146;g7709;g1635;g1233;g8810;g6125;g2571;g2313;g13276;g672;g9578;g4773;g10820;g16122;g5755;g8648;g475;g4023;g2852;g15636;g10823;g4286;g13321;g1203;g13019;g15156;g6410;g602;g5980;g5694;g562;g5564;g4232;g3034;g2357;g11098
GO:0017111	nucleoside-triphosphatase activity	42	42	1	1	g10811;g15889;g5023;g2380;g2194;g1333;g5674;g12146;g7709;g1635;g1233;g8810;g6125;g2571;g2313;g13276;g672;g9578;g4773;g10820;g16122;g5755;g8648;g475;g4023;g2852;g15636;g10823;g13321;g1203;g13019;g15156;g6410;g602;g5980;g5694;g562;g5564;g4232;g3034;g2357;g11098
GO:0005215	transporter activity	40	40	1	1	g12208;g3660;g11825;g4153;g6522;g6164;g15837;g10390;g9672;g9169;g5595;g5237;g4281;g3153;g2508;g1838;g15584;g11279;g12425;g6962;g15911;g9915;g11986;g10983;g13321;g1203;g1553;g8610;g7359;g15156;g6410;g602;g5980;g5694;g562;g5564;g4232;g3034;g2357;g11098
GO:0022857	transmembrane transporter activity	40	40	1	1	g12208;g3660;g11825;g4153;g6522;g6164;g15837;g10390;g9672;g9169;g5595;g5237;g4281;g3153;g2508;g1838;g15584;g11279;g12425;g6962;g15911;g9915;g11986;g10983;g13321;g1203;g1553;g8610;g7359;g15156;g6410;g602;g5980;g5694;g562;g5564;g4232;g3034;g2357;g11098
GO:0005515	protein binding	37	37	1	1	g2477;g795;g5922;g15316;g1635;g3788;g2663;g16122;g16006;g6814;g6710;g15714;g8930;g15457;g1048;g4482;g12620;g9010;g4968;g2260;g16055;g11986;g4057;g9081;g759;g4217;g1225;g14381;g5023;g2380;g1598;g1572;g15536;g7564;g11042;g8648;g10823
GO:0003677	DNA binding	33	33	1	1	g11042;g1635;g10811;g8679;g7564;g7432;g5932;g5922;g5719;g5393;g4671;g4319;g4217;g4094;g3810;g3697;g3128;g2807;g2488;g2464;g221;g16122;g16063;g16055;g16;g15889;g15316;g15421;g1057;g4833;g5674;g2682;g3374
GO:0046914	transition metal ion binding	33	33	1	1	g2399;g8245;g11984;g11950;g4833;g6095;g4286;g1233;g918;g8806;g7873;g7564;g7395;g7295;g5932;g5634;g4653;g3810;g3115;g2596;g2268;g221;g16063;g16;g1559;g4571;g9478;g4989;g2857;g2579;g16023;g14291;g10143
GO:0048037	cofactor binding	31	31	1	1	g1559;g5346;g3857;g278;g1636;g7449;g5903;g7249;g7073;g4910;g2983;g1884;g12422;g918;g7307;g4305;g3988;g3987;g2888;g4665;g3274;g2807;g15480;g13590;g7973;g3034;g4580;g4286;g5849;g4289;g14381
GO:0003723	RNA binding	29	29	1	1	g4832;g12225;g2194;g891;g8536;g7932;g6281;g6254;g4305;g4289;g4061;g319;g3076;g2488;g2199;g1333;g13222;g7300;g7518;g12573;g9081;g904;g759;g3788;g2556;g6095;g218;g15714;g7282
GO:0016887	ATPase activity	24	24	1	1	g10811;g15889;g5674;g12146;g672;g1635;g9578;g4773;g10820;g16122;g6125;g13321;g1203;g15156;g6410;g602;g5980;g5694;g562;g5564;g4232;g3034;g2357;g11098
GO:0016773	phosphotransferase activity, alcohol group as acceptor	23	23	1	1	g5755;g7134;g3128;g12412;g12080;g10901;g14321;g15829;g760;g16101;g5803;g12258;g9743;g7711;g4311;g2610;g2229;g1571;g1467;g12159;g5344;g8930;g9820
GO:0050662	coenzyme binding	23	23	1	1	g1559;g5346;g3857;g278;g1636;g7449;g5903;g7249;g7073;g1884;g12422;g4665;g3274;g2807;g15480;g13590;g7973;g3034;g4580;g4286;g5849;g4289;g14381
GO:0008270	zinc ion binding	20	20	1	1	g4833;g6095;g4286;g1233;g918;g8806;g7873;g7564;g7395;g7295;g5932;g5634;g4653;g3810;g3115;g2596;g2268;g221;g16063;g16
GO:0042623	ATPase activity, coupled	20	20	1	1	g10811;g15889;g5674;g12146;g672;g16122;g6125;g13321;g1203;g15156;g6410;g602;g5980;g5694;g562;g5564;g4232;g3034;g2357;g11098
GO:0016798	hydrolase activity, acting on glycosyl bonds	19	19	1	1	g7709;g8896;g7594;g11330;g4571;g9166;g6286;g5886;g4623;g174;g1715;g12204;g11016;g15891;g8112;g1685;g1562;g11568;g6254
GO:0022804	active transmembrane transporter activity	18	18	1	1	g12425;g15911;g9915;g11986;g10983;g13321;g1203;g15156;g6410;g602;g5980;g5694;g562;g5564;g4232;g3034;g2357;g11098
GO:0004672	protein kinase activity	17	17	1	1	g5755;g7134;g3128;g12412;g12080;g10901;g5803;g12258;g9743;g7711;g4311;g2610;g2229;g1571;g1467;g12159;g8930
GO:0008233	peptidase activity	17	17	1	1	g2697;g6579;g5674;g12146;g3115;g1539;g1347;g4643;g3945;g13874;g13864;g4506;g9209;g13151;g6599;g15737;g11549
GO:0016788	hydrolase activity, acting on ester bonds	17	17	1	1	g218;g5803;g2764;g10152;g470;g16122;g7757;g3911;g15421;g4289;g4365;g7932;g4970;g2983;g15282;g15549;g2737
GO:0004553	hydrolase activity, hydrolyzing O-glycosyl compounds	16	16	1	1	g7709;g7594;g11330;g4571;g9166;g6286;g5886;g4623;g174;g1715;g12204;g11016;g8112;g1685;g11568;g6254
GO:0022891	substrate-specific transmembrane transporter activity	16	16	1	1	g12208;g3660;g11825;g4153;g6522;g12425;g6962;g9915;g11986;g10983;g15911;g13321;g1203;g1553;g8610;g7359
GO:0022892	substrate-specific transporter activity	16	16	1	1	g12208;g3660;g11825;g4153;g6522;g12425;g6962;g9915;g11986;g10983;g15911;g13321;g1203;g1553;g8610;g7359
GO:0070011	peptidase activity, acting on L-amino acid peptides	16	16	1	1	g2697;g6579;g5674;g12146;g3115;g1539;g1347;g4643;g3945;g13874;g13864;g9209;g13151;g6599;g15737;g11549
GO:0016874	ligase activity	15	15	1	1	g4762;g7749;g6012;g11041;g2509;g6095;g4910;g4061;g16006;g9271;g2520;g5636;g5001;g4031;g13028
GO:0015075	ion transmembrane transporter activity	14	14	1	1	g12208;g11825;g4153;g6522;g12425;g6962;g9915;g11986;g10983;g15911;g13321;g1203;g1553;g7359
GO:0004386	helicase activity	13	13	1	1	g10811;g15889;g2194;g1333;g7709;g1635;g1233;g8810;g6125;g2571;g2313;g13276;g13019
GO:0015399	primary active transmembrane transporter activity	13	13	1	1	g13321;g1203;g15156;g6410;g602;g5980;g5694;g562;g5564;g4232;g3034;g2357;g11098
GO:0015405	P-P-bond-hydrolysis-driven transmembrane transporter activity	13	13	1	1	g13321;g1203;g15156;g6410;g602;g5980;g5694;g562;g5564;g4232;g3034;g2357;g11098
GO:0016820	hydrolase activity, acting on acid anhydrides, catalyzing transmembrane movement of substances	13	13	1	1	g13321;g1203;g15156;g6410;g602;g5980;g5694;g562;g5564;g4232;g3034;g2357;g11098
GO:0042626	ATPase activity, coupled to transmembrane movement of substances	13	13	1	1	g13321;g1203;g15156;g6410;g602;g5980;g5694;g562;g5564;g4232;g3034;g2357;g11098
GO:0043492	ATPase activity, coupled to movement of substances	13	13	1	1	g13321;g1203;g15156;g6410;g602;g5980;g5694;g562;g5564;g4232;g3034;g2357;g11098
GO:0005506	iron ion binding	12	12	1	1	g8245;g11984;g11950;g1559;g4571;g9478;g4989;g2857;g2579;g16023;g14291;g10143
GO:0016741	transferase activity, transferring one-carbon groups	12	12	1	1	g8010;g821;g3498;g8736;g2353;g3710;g7264;g6247;g6281;g12037;g8536;g4762
GO:0016757	transferase activity, transferring glycosyl groups	12	12	1	1	g4623;g7594;g1160;g8896;g7416;g504;g4435;g15452;g5023;g1768;g11142;g2971
GO:0005198	structural molecule activity	11	11	1	1	g4023;g6095;g8771;g7633;g7300;g5417;g2983;g16140;g10700;g11542;g11324
GO:0008168	methyltransferase activity	11	11	1	1	g8010;g821;g3498;g8736;g2353;g3710;g7264;g6247;g6281;g12037;g8536
GO:0044877	macromolecular complex binding	11	11	1	1	g5922;g15316;g2663;g475;g4057;g12225;g7564;g13320;g5393;g8648;g10823
GO:0046983	protein dimerization activity	11	11	1	1	g9010;g4968;g2260;g16055;g11986;g9081;g759;g4217;g1225;g795;g14381
GO:0098772	molecular function regulator	11	11	1	1	g727;g7038;g4127;g7590;g4057;g904;g1809;g795;g9797;g11221;g2663
GO:0004175	endopeptidase activity	10	10	1	1	g3115;g1539;g4643;g5674;g3945;g13874;g13864;g12146;g6599;g15737
GO:0004497	monooxygenase activity	10	10	1	1	g278;g1636;g9478;g4989;g2857;g2579;g1884;g16023;g11418;g1541
GO:0016746	transferase activity, transferring acyl groups	10	10	1	1	g15455;g3987;g15379;g8625;g4890;g842;g4165;g3291;g2229;g11148
GO:0020037	heme binding	10	10	1	1	g7449;g5903;g5515;g9478;g4989;g2857;g2579;g16023;g15134;g10711
GO:0046906	tetrapyrrole binding	10	10	1	1	g7449;g5903;g5515;g9478;g4989;g2857;g2579;g16023;g15134;g10711
GO:0001071	nucleic acid binding transcription factor activity	9	9	1	1	g1057;g4833;g5312;g4319;g7873;g5932;g221;g16063;g16
GO:0003700	transcription factor activity, sequence-specific DNA binding	9	9	1	1	g1057;g4833;g5312;g4319;g7873;g5932;g221;g16063;g16
GO:0003743	translation initiation factor activity	9	9	1	1	g12573;g9081;g904;g759;g7518;g4832;g3788;g2556;g12225
GO:0008135	translation factor activity, RNA binding	9	9	1	1	g12225;g12573;g9081;g904;g759;g7518;g4832;g3788;g2556
GO:0008324	cation transmembrane transporter activity	9	9	1	1	g12208;g4153;g6522;g9915;g11986;g15911;g13321;g1203;g1553
GO:0016614	oxidoreductase activity, acting on CH-OH group of donors	9	9	1	1	g4286;g9820;g5849;g4580;g5346;g1374;g3076;g14381;g4289
GO:0016758	transferase activity, transferring hexosyl groups	9	9	1	1	g4623;g7594;g1160;g7416;g4435;g5023;g1768;g11142;g2971
GO:0016779	nucleotidyltransferase activity	9	9	1	1	g5678;g16006;g2488;g16055;g7432;g3810;g904;g3291;g12200
GO:0016853	isomerase activity	9	9	1	1	g5719;g15713;g7453;g11549;g8806;g16122;g2152;g15513;g10256
GO:0042578	phosphoric ester hydrolase activity	9	9	1	1	g2764;g10152;g470;g16122;g7757;g3911;g2983;g15282;g15549
GO:0050660	flavin adenine dinucleotide binding	9	9	1	1	g1559;g5346;g3857;g278;g1636;g4665;g3274;g2807;g15480
GO:0051213	dioxygenase activity	9	9	1	1	g2454;g1994;g1541;g15134;g4571;g8245;g11984;g11950;g10143
GO:0000287	magnesium ion binding	8	8	1	1	g4580;g380;g4289;g4061;g3034;g15455;g13644;g11145
GO:0005525	GTP binding	8	8	1	1	g8648;g6593;g6191;g475;g4023;g2852;g15636;g10823
GO:0016705	oxidoreductase activity, acting on paired donors, with incorporation or reduction of molecular oxygen	8	8	1	1	g9478;g4989;g2857;g2579;g16023;g278;g1636;g10711
GO:0016829	lyase activity	8	8	1	1	g380;g13644;g9820;g4637;g8631;g15835;g2596;g502
GO:0019001	guanyl nucleotide binding	8	8	1	1	g8648;g6593;g6191;g475;g4023;g2852;g15636;g10823
GO:0022890	inorganic cation transmembrane transporter activity	8	8	1	1	g12208;g4153;g9915;g11986;g13321;g1203;g1553;g15911
GO:0032561	guanyl ribonucleotide binding	8	8	1	1	g8648;g6593;g6191;g475;g4023;g2852;g15636;g10823
GO:0051536	iron-sulfur cluster binding	8	8	1	1	g1008;g1559;g1110;g10700;g7449;g5903;g7432;g3810
GO:0051540	metal cluster binding	8	8	1	1	g1008;g1559;g1110;g10700;g7449;g5903;g7432;g3810
GO:0003735	structural constituent of ribosome	7	7	1	1	g6095;g8771;g7633;g7300;g5417;g2983;g16140
GO:0003924	GTPase activity	7	7	1	1	g5755;g8648;g475;g4023;g2852;g15636;g10823
GO:0004674	protein serine/threonine kinase activity	7	7	1	1	g5755;g7134;g3128;g12412;g12080;g10901;g8930
GO:0008236	serine-type peptidase activity	7	7	1	1	g4643;g5674;g3945;g13874;g13864;g12146;g11549
GO:0016616	oxidoreductase activity, acting on the CH-OH group of donors, NAD or NADP as acceptor	7	7	1	1	g4286;g9820;g5849;g4580;g3076;g14381;g4289
GO:0016701	oxidoreductase activity, acting on single donors with incorporation of molecular oxygen	7	7	1	1	g14291;g4571;g8245;g11984;g11950;g10143;g1541
GO:0016791	phosphatase activity	7	7	1	1	g2764;g10152;g470;g16122;g2983;g15282;g15549
GO:0017171	serine hydrolase activity	7	7	1	1	g4643;g5674;g3945;g13874;g13864;g12146;g11549
GO:0000981	RNA polymerase II transcription factor activity, sequence-specific DNA binding	6	6	1	1	g1057;g7873;g5932;g221;g16063;g16
GO:0004252	serine-type endopeptidase activity	6	6	1	1	g4643;g5674;g3945;g13874;g13864;g12146
GO:0008509	anion transmembrane transporter activity	6	6	1	1	g11825;g12425;g6962;g10983;g15911;g7359
GO:0015077	monovalent inorganic cation transmembrane transporter activity	6	6	1	1	g12208;g4153;g9915;g11986;g13321;g1203
GO:0016835	carbon-oxygen lyase activity	6	6	1	1	g380;g13644;g9820;g8631;g2596;g502
GO:0030170	pyridoxal phosphate binding	6	6	1	1	g918;g7307;g4305;g3988;g3987;g2888
GO:0030234	enzyme regulator activity	6	6	1	1	g7590;g4057;g795;g9797;g11221;g2663
GO:0032403	protein complex binding	6	6	1	1	g5922;g15316;g2663;g7564;g8648;g10823
GO:0051287	NAD binding	6	6	1	1	g7073;g4580;g4286;g5849;g4289;g14381
GO:0003779	actin binding	5	5	1	1	g5023;g2477;g2380;g1598;g1572
GO:0004518	nuclease activity	5	5	1	1	g5803;g15421;g4289;g7932;g4970
GO:0004721	phosphoprotein phosphatase activity	5	5	1	1	g2764;g10152;g470;g16122;g2983
GO:0005085	guanyl-nucleotide exchange factor activity	5	5	1	1	g727;g7038;g4127;g904;g1809
GO:0008092	cytoskeletal protein binding	5	5	1	1	g5023;g2477;g2380;g1598;g1572
GO:0008289	lipid binding	5	5	1	1	g2477;g7185;g2883;g8942;g12991
GO:0008483	transaminase activity	5	5	1	1	g3988;g918;g2888;g7307;g3987
GO:0008757	S-adenosylmethionine-dependent methyltransferase activity	5	5	1	1	g821;g3498;g6281;g12037;g8536
GO:0010181	FMN binding	5	5	1	1	g1559;g7449;g5903;g13590;g7973
GO:0015078	hydrogen ion transmembrane transporter activity	5	5	1	1	g12208;g9915;g11986;g13321;g1203
GO:0015291	secondary active transmembrane transporter activity	5	5	1	1	g12425;g15911;g9915;g11986;g10983
GO:0016651	oxidoreductase activity, acting on NAD(P)H	5	5	1	1	g15420;g1110;g2770;g7449;g5903
GO:0016702	oxidoreductase activity, acting on single donors with incorporation of molecular oxygen, incorporation of two atoms of oxygen	5	5	1	1	g4571;g8245;g11984;g11950;g10143
GO:0016747	transferase activity, transferring acyl groups other than amino-acyl groups	5	5	1	1	g15455;g3987;g8625;g4890;g11148
GO:0016769	transferase activity, transferring nitrogenous groups	5	5	1	1	g3988;g918;g2888;g7307;g3987
GO:0016810	hydrolase activity, acting on carbon-nitrogen (but not peptide) bonds	5	5	1	1	g7777;g5593;g15207;g4286;g7643
GO:0019899	enzyme binding	5	5	1	1	g6814;g6710;g15714;g4057;g11042
GO:0050661	NADP binding	5	5	1	1	g7449;g5903;g7249;g278;g1636
GO:0004842	ubiquitin-protein transferase activity	4	4	1	1	g3457;g11042;g7307;g5633
GO:0008094	DNA-dependent ATPase activity	4	4	1	1	g10811;g15889;g672;g16122
GO:0008237	metallopeptidase activity	4	4	1	1	g6579;g3115;g1539;g13151
GO:0008276	protein methyltransferase activity	4	4	1	1	g8010;g2353;g12037;g8536
GO:0016620	oxidoreductase activity, acting on the aldehyde or oxo group of donors, NAD or NADP as acceptor	4	4	1	1	g5849;g7249;g3178;g5810
GO:0016638	oxidoreductase activity, acting on the CH-NH2 group of donors	4	4	1	1	g1559;g5806;g3274;g15480
GO:0016836	hydro-lyase activity	4	4	1	1	g9820;g8631;g2596;g502
GO:0016879	ligase activity, forming carbon-nitrogen bonds	4	4	1	1	g4762;g7749;g6012;g2509
GO:0016903	oxidoreductase activity, acting on the aldehyde or oxo group of donors	4	4	1	1	g5849;g7249;g3178;g5810
GO:0019787	ubiquitin-like protein transferase activity	4	4	1	1	g3457;g11042;g7307;g5633
GO:0030246	carbohydrate binding	4	4	1	1	g4571;g1685;g15104;g11568
GO:0042802	identical protein binding	4	4	1	1	g16122;g16006;g795;g14381
GO:0043021	ribonucleoprotein complex binding	4	4	1	1	g475;g4057;g12225;g13320
GO:0043565	sequence-specific DNA binding	4	4	1	1	g11042;g1057;g4833;g5674
GO:0046873	metal ion transmembrane transporter activity	4	4	1	1	g4153;g11986;g1553;g15911
GO:0046982	protein heterodimerization activity	4	4	1	1	g9081;g759;g4217;g1225
GO:0051539	4 iron, 4 sulfur cluster binding	4	4	1	1	g7449;g5903;g7432;g3810
GO:0071949	FAD binding	4	4	1	1	g4665;g3274;g2807;g15480
GO:0000049	tRNA binding	3	3	1	1	g6095;g218;g15714
GO:0003678	DNA helicase activity	3	3	1	1	g10811;g15889;g13019
GO:0003682	chromatin binding	3	3	1	1	g5922;g15316;g5393
GO:0003755	peptidyl-prolyl cis-trans isomerase activity	3	3	1	1	g2152;g15513;g10256
GO:0004527	exonuclease activity	3	3	1	1	g4289;g7932;g4970
GO:0004812	aminoacyl-tRNA ligase activity	3	3	1	1	g11041;g6095;g4061
GO:0005088	Ras guanyl-nucleotide exchange factor activity	3	3	1	1	g727;g7038;g4127
GO:0005089	Rho guanyl-nucleotide exchange factor activity	3	3	1	1	g727;g7038;g4127
GO:0005543	phospholipid binding	3	3	1	1	g2477;g7185;g2883
GO:0008047	enzyme activator activity	3	3	1	1	g9797;g11221;g2663
GO:0008170	N-methyltransferase activity	3	3	1	1	g6281;g12037;g8536
GO:0008173	RNA methyltransferase activity	3	3	1	1	g3498;g8736;g6281
GO:0008199	ferric iron binding	3	3	1	1	g8245;g11984;g11950
GO:0008234	cysteine-type peptidase activity	3	3	1	1	g2697;g1347;g9209
GO:0008536	Ran GTPase binding	3	3	1	1	g6814;g6710;g15714
GO:0015297	antiporter activity	3	3	1	1	g9915;g11986;g10983
GO:0015926	glucosidase activity	3	3	1	1	g7594;g11330;g11568
GO:0016627	oxidoreductase activity, acting on the CH-CH group of donors	3	3	1	1	g15455;g7388;g5515
GO:0016838	carbon-oxygen lyase activity, acting on phosphates	3	3	1	1	g380;g13644;g9820
GO:0016859	cis-trans isomerase activity	3	3	1	1	g2152;g15513;g10256
GO:0016875	ligase activity, forming carbon-oxygen bonds	3	3	1	1	g11041;g6095;g4061
GO:0016876	ligase activity, forming aminoacyl-tRNA and related compounds	3	3	1	1	g11041;g6095;g4061
GO:0017016	Ras GTPase binding	3	3	1	1	g6814;g6710;g15714
GO:0031267	small GTPase binding	3	3	1	1	g6814;g6710;g15714
GO:0043022	ribosome binding	3	3	1	1	g475;g4057;g12225
GO:0051020	GTPase binding	3	3	1	1	g6814;g6710;g15714
GO:0052689	carboxylic ester hydrolase activity	3	3	1	1	g218;g4365;g2737
GO:0060589	nucleoside-triphosphatase regulator activity	3	3	1	1	g795;g9797;g11221
GO:0003684	damaged DNA binding	2	2	1	1	g2682;g3374
GO:0003690	double-stranded DNA binding	2	2	1	1	g11042;g1057
GO:0003724	RNA helicase activity	2	2	1	1	g2194;g1333
GO:0003774	motor activity	2	2	1	1	g5023;g2380
GO:0003884	D-amino-acid oxidase activity	2	2	1	1	g3274;g15480
GO:0003887	DNA-directed DNA polymerase activity	2	2	1	1	g7432;g3810
GO:0003899	DNA-directed RNA polymerase activity	2	2	1	1	g2488;g16055
GO:0003916	DNA topoisomerase activity	2	2	1	1	g5719;g16122
GO:0003954	NADH dehydrogenase activity	2	2	1	1	g15420;g1110
GO:0004003	ATP-dependent DNA helicase activity	2	2	1	1	g10811;g15889
GO:0004069	L-aspartate:2-oxoglutarate aminotransferase activity	2	2	1	1	g918;g2888
GO:0004133	glycogen debranching enzyme activity	2	2	1	1	g7453;g7594
GO:0004176	ATP-dependent peptidase activity	2	2	1	1	g5674;g12146
GO:0004177	aminopeptidase activity	2	2	1	1	g6579;g13151
GO:0004190	aspartic-type endopeptidase activity	2	2	1	1	g6599;g15737
GO:0004222	metalloendopeptidase activity	2	2	1	1	g3115;g1539
GO:0004499	N,N-dimethylaniline monooxygenase activity	2	2	1	1	g278;g1636
GO:0004725	protein tyrosine phosphatase activity	2	2	1	1	g470;g16122
GO:0004783	sulfite reductase (NADPH) activity	2	2	1	1	g7449;g5903
GO:0005096	GTPase activator activity	2	2	1	1	g9797;g11221
GO:0005199	structural constituent of cell wall	2	2	1	1	g11542;g11324
GO:0005216	ion channel activity	2	2	1	1	g6962;g7359
GO:0005244	voltage-gated ion channel activity	2	2	1	1	g6962;g7359
GO:0005253	anion channel activity	2	2	1	1	g6962;g7359
GO:0005516	calmodulin binding	2	2	1	1	g8930;g15457
GO:0008026	ATP-dependent helicase activity	2	2	1	1	g10811;g15889
GO:0008081	phosphoric diester hydrolase activity	2	2	1	1	g7757;g3911
GO:0008134	transcription factor binding	2	2	1	1	g1635;g3788
GO:0008137	NADH dehydrogenase (ubiquinone) activity	2	2	1	1	g15420;g1110
GO:0008194	UDP-glycosyltransferase activity	2	2	1	1	g4435;g2971
GO:0008238	exopeptidase activity	2	2	1	1	g6579;g13151
GO:0008308	voltage-gated anion channel activity	2	2	1	1	g6962;g7359
GO:0008375	acetylglucosaminyltransferase activity	2	2	1	1	g4435;g2971
GO:0008553	hydrogen-exporting ATPase activity, phosphorylative mechanism	2	2	1	1	g13321;g1203
GO:0010333	terpene synthase activity	2	2	1	1	g380;g13644
GO:0015103	inorganic anion transmembrane transporter activity	2	2	1	1	g11825;g7359
GO:0015267	channel activity	2	2	1	1	g6962;g7359
GO:0015298	solute:cation antiporter activity	2	2	1	1	g9915;g11986
GO:0015299	solute:proton antiporter activity	2	2	1	1	g9915;g11986
GO:0015616	DNA translocase activity	2	2	1	1	g672;g15889
GO:0015662	ATPase activity, coupled to transmembrane movement of ions, phosphorylative mechanism	2	2	1	1	g13321;g1203
GO:0015932	nucleobase-containing compound transmembrane transporter activity	2	2	1	1	g3660;g8610
GO:0016278	lysine N-methyltransferase activity	2	2	1	1	g12037;g8536
GO:0016279	protein-lysine N-methyltransferase activity	2	2	1	1	g12037;g8536
GO:0016410	N-acyltransferase activity	2	2	1	1	g3987;g8625
GO:0016641	oxidoreductase activity, acting on the CH-NH2 group of donors, oxygen as acceptor	2	2	1	1	g3274;g15480
GO:0016655	oxidoreductase activity, acting on NAD(P)H, quinone or similar compound as acceptor	2	2	1	1	g15420;g1110
GO:0016667	oxidoreductase activity, acting on a sulfur group of donors	2	2	1	1	g7449;g5903
GO:0016668	oxidoreductase activity, acting on a sulfur group of donors, NAD(P) as acceptor	2	2	1	1	g7449;g5903
GO:0016709	oxidoreductase activity, acting on paired donors, with incorporation or reduction of molecular oxygen, NAD(P)H as one donor, and incorporation of one atom of oxygen	2	2	1	1	g278;g1636
GO:0016763	transferase activity, transferring pentosyl groups	2	2	1	1	g8896;g504
GO:0016765	transferase activity, transferring alkyl or aryl (other than methyl) groups	2	2	1	1	g7203;g9820
GO:0016782	transferase activity, transferring sulfur-containing groups	2	2	1	1	g16006;g1598
GO:0016799	hydrolase activity, hydrolyzing N-glycosyl compounds	2	2	1	1	g8896;g15891
GO:0016877	ligase activity, forming carbon-sulfur bonds	2	2	1	1	g4910;g16006
GO:0016884	carbon-nitrogen ligase activity, with glutamine as amido-N-donor	2	2	1	1	g4762;g7749
GO:0017025	TBP-class protein binding	2	2	1	1	g1635;g3788
GO:0018024	histone-lysine N-methyltransferase activity	2	2	1	1	g12037;g8536
GO:0019207	kinase regulator activity	2	2	1	1	g7590;g4057
GO:0019783	ubiquitin-like protein-specific protease activity	2	2	1	1	g1347;g9209
GO:0019829	cation-transporting ATPase activity	2	2	1	1	g13321;g1203
GO:0019843	rRNA binding	2	2	1	1	g7300;g7282
GO:0019887	protein kinase regulator activity	2	2	1	1	g7590;g4057
GO:0022803	passive transmembrane transporter activity	2	2	1	1	g6962;g7359
GO:0022832	voltage-gated channel activity	2	2	1	1	g6962;g7359
GO:0022836	gated channel activity	2	2	1	1	g6962;g7359
GO:0022838	substrate-specific channel activity	2	2	1	1	g6962;g7359
GO:0030695	GTPase regulator activity	2	2	1	1	g9797;g11221
GO:0031491	nucleosome binding	2	2	1	1	g5922;g15316
GO:0031683	G-protein beta/gamma-subunit complex binding	2	2	1	1	g8648;g10823
GO:0034061	DNA polymerase activity	2	2	1	1	g7432;g3810
GO:0034062	RNA polymerase activity	2	2	1	1	g2488;g16055
GO:0035091	phosphatidylinositol binding	2	2	1	1	g7185;g2883
GO:0036442	hydrogen-exporting ATPase activity	2	2	1	1	g13321;g1203
GO:0036459	thiol-dependent ubiquitinyl hydrolase activity	2	2	1	1	g1347;g9209
GO:0042054	histone methyltransferase activity	2	2	1	1	g12037;g8536
GO:0042625	ATPase coupled ion transmembrane transporter activity	2	2	1	1	g13321;g1203
GO:0042803	protein homodimerization activity	2	2	1	1	g795;g14381
GO:0050136	NADH dehydrogenase (quinone) activity	2	2	1	1	g15420;g1110
GO:0061630	ubiquitin protein ligase activity	2	2	1	1	g3457;g11042
GO:0061659	ubiquitin-like protein ligase activity	2	2	1	1	g3457;g11042
GO:0070001	aspartic-type peptidase activity	2	2	1	1	g6599;g15737
GO:0070035	purine NTP-dependent helicase activity	2	2	1	1	g10811;g15889
GO:0099516	ion antiporter activity	2	2	1	1	g11986;g10983
GO:0101005	ubiquitinyl hydrolase activity	2	2	1	1	g1347;g9209
GO:1901505	carbohydrate derivative transporter activity	2	2	1	1	g3660;g8610
GO:1901677	phosphate transmembrane transporter activity	2	2	1	1	g15911;g8610
GO:1990837	sequence-specific double-stranded DNA binding	2	2	1	1	g11042;g1057
GO:0000030	mannosyltransferase activity	1	1	1	1	g1160
GO:0000104	succinate dehydrogenase activity	1	1	1	1	g5515
GO:0000175	3'-5'-exoribonuclease activity	1	1	1	1	g4289
GO:0000179	rRNA (adenine-N6,N6-)-dimethyltransferase activity	1	1	1	1	g6281
GO:0000334	3-hydroxyanthranilate 3,4-dioxygenase activity	1	1	1	1	g10143
GO:0000339	RNA cap binding	1	1	1	1	g4832
GO:0000774	adenyl-nucleotide exchange factor activity	1	1	1	1	g795
GO:0000822	inositol hexakisphosphate binding	1	1	1	1	g15457
GO:0000975	regulatory region DNA binding	1	1	1	1	g1057
GO:0000976	transcription regulatory region sequence-specific DNA binding	1	1	1	1	g1057
GO:0000977	RNA polymerase II regulatory region sequence-specific DNA binding	1	1	1	1	g1057
GO:0000978	RNA polymerase II core promoter proximal region sequence-specific DNA binding	1	1	1	1	g1057
GO:0000987	core promoter proximal region sequence-specific DNA binding	1	1	1	1	g1057
GO:0000988	transcription factor activity, protein binding	1	1	1	1	g3788
GO:0000990	transcription factor activity, core RNA polymerase binding	1	1	1	1	g3788
GO:0000991	transcription factor activity, core RNA polymerase II binding	1	1	1	1	g3788
GO:0001012	RNA polymerase II regulatory region DNA binding	1	1	1	1	g1057
GO:0001055	RNA polymerase II activity	1	1	1	1	g2488
GO:0001067	regulatory region nucleic acid binding	1	1	1	1	g1057
GO:0001139	transcription factor activity, core RNA polymerase II recruiting	1	1	1	1	g3788
GO:0001159	core promoter proximal region DNA binding	1	1	1	1	g1057
GO:0001228	transcriptional activator activity, RNA polymerase II transcription regulatory region sequence-specific binding	1	1	1	1	g1057
GO:0001664	G-protein coupled receptor binding	1	1	1	1	g10823
GO:0001871	pattern binding	1	1	1	1	g11568
GO:0002094	polyprenyltransferase activity	1	1	1	1	g7203
GO:0003688	DNA replication origin binding	1	1	1	1	g11042
GO:0003697	single-stranded DNA binding	1	1	1	1	g15421
GO:0003725	double-stranded RNA binding	1	1	1	1	g7518
GO:0003727	single-stranded RNA binding	1	1	1	1	g7518
GO:0003746	translation elongation factor activity	1	1	1	1	g12225
GO:0003844	1,4-alpha-glucan branching enzyme activity	1	1	1	1	g4623
GO:0003855	3-dehydroquinate dehydratase activity	1	1	1	1	g9820
GO:0003856	3-dehydroquinate synthase activity	1	1	1	1	g9820
GO:0003862	3-isopropylmalate dehydrogenase activity	1	1	1	1	g4580
GO:0003866	3-phosphoshikimate 1-carboxyvinyltransferase activity	1	1	1	1	g9820
GO:0003870	5-aminolevulinate synthase activity	1	1	1	1	g3987
GO:0003873	6-phosphofructo-2-kinase activity	1	1	1	1	g15829
GO:0003883	CTP synthase activity	1	1	1	1	g6012
GO:0003917	DNA topoisomerase type I activity	1	1	1	1	g5719
GO:0003918	DNA topoisomerase type II (ATP-hydrolyzing) activity	1	1	1	1	g16122
GO:0003951	NAD+ kinase activity	1	1	1	1	g760
GO:0003952	NAD+ synthase (glutamine-hydrolyzing) activity	1	1	1	1	g7749
GO:0003968	RNA-directed RNA polymerase activity	1	1	1	1	g2488
GO:0003992	N2-acetyl-L-ornithine:2-oxoglutarate 5-aminotransferase activity	1	1	1	1	g3988
GO:0004040	amidase activity	1	1	1	1	g7643
GO:0004042	acetyl-CoA:L-glutamate N-acetyltransferase activity	1	1	1	1	g8625
GO:0004044	amidophosphoribosyltransferase activity	1	1	1	1	g504
GO:0004070	aspartate carbamoyltransferase activity	1	1	1	1	g4762
GO:0004088	carbamoyl-phosphate synthase (glutamine-hydrolyzing) activity	1	1	1	1	g4762
GO:0004089	carbonate dehydratase activity	1	1	1	1	g2596
GO:0004100	chitin synthase activity	1	1	1	1	g4435
GO:0004128	cytochrome-b5 reductase activity, acting on NAD(P)H	1	1	1	1	g2770
GO:0004134	4-alpha-glucanotransferase activity	1	1	1	1	g7594
GO:0004135	amylo-alpha-1,6-glucosidase activity	1	1	1	1	g7594
GO:0004164	diphthine synthase activity	1	1	1	1	g821
GO:0004169	dolichyl-phosphate-mannose-protein mannosyltransferase activity	1	1	1	1	g1160
GO:0004312	fatty acid synthase activity	1	1	1	1	g15455
GO:0004318	enoyl-[acyl-carrier-protein] reductase (NADH) activity	1	1	1	1	g15455
GO:0004339	glucan 1,4-alpha-glucosidase activity	1	1	1	1	g11568
GO:0004350	glutamate-5-semialdehyde dehydrogenase activity	1	1	1	1	g7249
GO:0004355	glutamate synthase (NADPH) activity	1	1	1	1	g1559
GO:0004358	glutamate N-acetyltransferase activity	1	1	1	1	g8625
GO:0004367	glycerol-3-phosphate dehydrogenase [NAD+] activity	1	1	1	1	g14381
GO:0004371	glycerone kinase activity	1	1	1	1	g14321
GO:0004375	glycine dehydrogenase (decarboxylating) activity	1	1	1	1	g5806
GO:0004399	histidinol dehydrogenase activity	1	1	1	1	g4286
GO:0004448	isocitrate dehydrogenase activity	1	1	1	1	g4289
GO:0004449	isocitrate dehydrogenase (NAD+) activity	1	1	1	1	g4289
GO:0004455	ketol-acid reductoisomerase activity	1	1	1	1	g3076
GO:0004476	mannose-6-phosphate isomerase activity	1	1	1	1	g8806
GO:0004491	methylmalonate-semialdehyde dehydrogenase (acylating) activity	1	1	1	1	g3178
GO:0004519	endonuclease activity	1	1	1	1	g15421
GO:0004532	exoribonuclease activity	1	1	1	1	g4289
GO:0004540	ribonuclease activity	1	1	1	1	g4289
GO:0004555	alpha,alpha-trehalase activity	1	1	1	1	g6254
GO:0004559	alpha-mannosidase activity	1	1	1	1	g1685
GO:0004563	beta-N-acetylhexosaminidase activity	1	1	1	1	g8112
GO:0004605	phosphatidate cytidylyltransferase activity	1	1	1	1	g5678
GO:0004635	phosphoribosyl-AMP cyclohydrolase activity	1	1	1	1	g4286
GO:0004636	phosphoribosyl-ATP diphosphatase activity	1	1	1	1	g4286
GO:0004637	phosphoribosylamine-glycine ligase activity	1	1	1	1	g2509
GO:0004641	phosphoribosylformylglycinamidine cyclo-ligase activity	1	1	1	1	g2509
GO:0004650	polygalacturonase activity	1	1	1	1	g7709
GO:0004659	prenyltransferase activity	1	1	1	1	g7203
GO:0004683	calmodulin-dependent protein kinase activity	1	1	1	1	g8930
GO:0004713	protein tyrosine kinase activity	1	1	1	1	g12080
GO:0004722	protein serine/threonine phosphatase activity	1	1	1	1	g2983
GO:0004724	magnesium-dependent protein serine/threonine phosphatase activity	1	1	1	1	g2983
GO:0004731	purine-nucleoside phosphorylase activity	1	1	1	1	g8896
GO:0004748	ribonucleoside-diphosphate reductase activity, thioredoxin disulfide as acceptor	1	1	1	1	g11554
GO:0004749	ribose phosphate diphosphokinase activity	1	1	1	1	g11145
GO:0004764	shikimate 3-dehydrogenase (NADP+) activity	1	1	1	1	g9820
GO:0004765	shikimate kinase activity	1	1	1	1	g9820
GO:0004768	stearoyl-CoA 9-desaturase activity	1	1	1	1	g10711
GO:0004774	succinate-CoA ligase activity	1	1	1	1	g4910
GO:0004775	succinate-CoA ligase (ADP-forming) activity	1	1	1	1	g4910
GO:0004792	thiosulfate sulfurtransferase activity	1	1	1	1	g16006
GO:0004801	sedoheptulose-7-phosphate:D-glyceraldehyde-3-phosphate glyceronetransferase activity	1	1	1	1	g6334
GO:0004806	triglyceride lipase activity	1	1	1	1	g4365
GO:0004813	alanine-tRNA ligase activity	1	1	1	1	g6095
GO:0004826	phenylalanine-tRNA ligase activity	1	1	1	1	g4061
GO:0004830	tryptophan-tRNA ligase activity	1	1	1	1	g11041
GO:0004834	tryptophan synthase activity	1	1	1	1	g502
GO:0004843	thiol-dependent ubiquitin-specific protease activity	1	1	1	1	g1347
GO:0004846	urate oxidase activity	1	1	1	1	g7873
GO:0005102	receptor binding	1	1	1	1	g10823
GO:0005200	structural constituent of cytoskeleton	1	1	1	1	g4023
GO:0005247	voltage-gated chloride channel activity	1	1	1	1	g7359
GO:0005254	chloride channel activity	1	1	1	1	g7359
GO:0005315	inorganic phosphate transmembrane transporter activity	1	1	1	1	g15911
GO:0005337	nucleoside transmembrane transporter activity	1	1	1	1	g3660
GO:0005338	nucleotide-sugar transmembrane transporter activity	1	1	1	1	g8610
GO:0005342	organic acid transmembrane transporter activity	1	1	1	1	g12425
GO:0005371	tricarboxylate secondary active transmembrane transporter activity	1	1	1	1	g12425
GO:0005384	manganese ion transmembrane transporter activity	1	1	1	1	g15911
GO:0005451	monovalent cation:proton antiporter activity	1	1	1	1	g11986
GO:0005452	inorganic anion exchanger activity	1	1	1	1	g10983
GO:0005457	GDP-fucose transmembrane transporter activity	1	1	1	1	g8610
GO:0005507	copper ion binding	1	1	1	1	g2399
GO:0005509	calcium ion binding	1	1	1	1	g450
GO:0008080	N-acetyltransferase activity	1	1	1	1	g8625
GO:0008171	O-methyltransferase activity	1	1	1	1	g2353
GO:0008175	tRNA methyltransferase activity	1	1	1	1	g3498
GO:0008186	RNA-dependent ATPase activity	1	1	1	1	g6125
GO:0008198	ferrous iron binding	1	1	1	1	g10143
GO:0008235	metalloexopeptidase activity	1	1	1	1	g6579
GO:0008260	3-oxoacid CoA-transferase activity	1	1	1	1	g1598
GO:0008408	3'-5' exonuclease activity	1	1	1	1	g4289
GO:0008410	CoA-transferase activity	1	1	1	1	g1598
GO:0008422	beta-glucosidase activity	1	1	1	1	g11330
GO:0008443	phosphofructokinase activity	1	1	1	1	g15829
GO:0008446	GDP-mannose 4,6-dehydratase activity	1	1	1	1	g8631
GO:0008477	purine nucleosidase activity	1	1	1	1	g8896
GO:0008514	organic anion transmembrane transporter activity	1	1	1	1	g12425
GO:0008641	small protein activating enzyme activity	1	1	1	1	g16006
GO:0008649	rRNA methyltransferase activity	1	1	1	1	g6281
GO:0008863	formate dehydrogenase (NAD+) activity	1	1	1	1	g5849
GO:0008897	holo-[acyl-carrier-protein] synthase activity	1	1	1	1	g15455
GO:0008976	polyphosphate kinase activity	1	1	1	1	g15457
GO:0009055	electron carrier activity	1	1	1	1	g1110
GO:0009982	pseudouridine synthase activity	1	1	1	1	g15713
GO:0010340	carboxyl-O-methyltransferase activity	1	1	1	1	g2353
GO:0015079	potassium ion transmembrane transporter activity	1	1	1	1	g4153
GO:0015081	sodium ion transmembrane transporter activity	1	1	1	1	g11986
GO:0015108	chloride transmembrane transporter activity	1	1	1	1	g7359
GO:0015109	chromate transmembrane transporter activity	1	1	1	1	g11825
GO:0015142	tricarboxylic acid transmembrane transporter activity	1	1	1	1	g12425
GO:0015215	nucleotide transmembrane transporter activity	1	1	1	1	g8610
GO:0015293	symporter activity	1	1	1	1	g15911
GO:0015294	solute:cation symporter activity	1	1	1	1	g15911
GO:0015295	solute:proton symporter activity	1	1	1	1	g15911
GO:0015301	anion:anion antiporter activity	1	1	1	1	g10983
GO:0015385	sodium:proton antiporter activity	1	1	1	1	g11986
GO:0015491	cation:cation antiporter activity	1	1	1	1	g11986
GO:0015605	organophosphate ester transmembrane transporter activity	1	1	1	1	g8610
GO:0015923	mannosidase activity	1	1	1	1	g1685
GO:0015927	trehalase activity	1	1	1	1	g6254
GO:0015929	hexosaminidase activity	1	1	1	1	g8112
GO:0015930	glutamate synthase activity	1	1	1	1	g1559
GO:0016040	glutamate synthase (NADH) activity	1	1	1	1	g1559
GO:0016209	antioxidant activity	1	1	1	1	g9478
GO:0016215	acyl-CoA desaturase activity	1	1	1	1	g10711
GO:0016298	lipase activity	1	1	1	1	g4365
GO:0016303	1-phosphatidylinositol-3-kinase activity	1	1	1	1	g16101
GO:0016405	CoA-ligase activity	1	1	1	1	g4910
GO:0016407	acetyltransferase activity	1	1	1	1	g8625
GO:0016409	palmitoyltransferase activity	1	1	1	1	g11148
GO:0016417	S-acyltransferase activity	1	1	1	1	g11148
GO:0016427	tRNA (cytosine) methyltransferase activity	1	1	1	1	g3498
GO:0016433	rRNA (adenine) methyltransferase activity	1	1	1	1	g6281
GO:0016504	peptidase activator activity	1	1	1	1	g2663
GO:0016597	amino acid binding	1	1	1	1	g4762
GO:0016628	oxidoreductase activity, acting on the CH-CH group of donors, NAD or NADP as acceptor	1	1	1	1	g15455
GO:0016639	oxidoreductase activity, acting on the CH-NH2 group of donors, NAD or NADP as acceptor	1	1	1	1	g1559
GO:0016642	oxidoreductase activity, acting on the CH-NH2 group of donors, disulfide as acceptor	1	1	1	1	g5806
GO:0016653	oxidoreductase activity, acting on NAD(P)H, heme protein as acceptor	1	1	1	1	g2770
GO:0016661	oxidoreductase activity, acting on other nitrogenous compounds as donors	1	1	1	1	g7873
GO:0016663	oxidoreductase activity, acting on other nitrogenous compounds as donors, oxygen as acceptor	1	1	1	1	g7873
GO:0016703	oxidoreductase activity, acting on single donors with incorporation of molecular oxygen, incorporation of one atom of oxygen (internal monooxygenases or internal mixed function oxidases)	1	1	1	1	g1541
GO:0016717	oxidoreductase activity, acting on paired donors, with oxidation of a pair of donors resulting in the reduction of molecular oxygen to two molecules of water	1	1	1	1	g10711
GO:0016725	oxidoreductase activity, acting on CH or CH2 groups	1	1	1	1	g11554
GO:0016728	oxidoreductase activity, acting on CH or CH2 groups, disulfide as acceptor	1	1	1	1	g11554
GO:0016743	carboxyl- or carbamoyltransferase activity	1	1	1	1	g4762
GO:0016744	transferase activity, transferring aldehyde or ketonic groups	1	1	1	1	g6334
GO:0016748	succinyltransferase activity	1	1	1	1	g3987
GO:0016749	N-succinyltransferase activity	1	1	1	1	g3987
GO:0016776	phosphotransferase activity, phosphate group as acceptor	1	1	1	1	g15457
GO:0016778	diphosphotransferase activity	1	1	1	1	g11145
GO:0016780	phosphotransferase activity, for other substituted phosphate groups	1	1	1	1	g15455
GO:0016783	sulfurtransferase activity	1	1	1	1	g16006
GO:0016796	exonuclease activity, active with either ribo- or deoxyribonucleic acids and producing 5'-phosphomonoesters	1	1	1	1	g4289
GO:0016811	hydrolase activity, acting on carbon-nitrogen (but not peptide) bonds, in linear amides	1	1	1	1	g7643
GO:0016814	hydrolase activity, acting on carbon-nitrogen (but not peptide) bonds, in cyclic amidines	1	1	1	1	g4286
GO:0016830	carbon-carbon lyase activity	1	1	1	1	g15835
GO:0016832	aldehyde-lyase activity	1	1	1	1	g15835
GO:0016860	intramolecular oxidoreductase activity	1	1	1	1	g8806
GO:0016861	intramolecular oxidoreductase activity, interconverting aldoses and ketoses	1	1	1	1	g8806
GO:0016866	intramolecular transferase activity	1	1	1	1	g15713
GO:0016878	acid-thiol ligase activity	1	1	1	1	g4910
GO:0016882	cyclo-ligase activity	1	1	1	1	g2509
GO:0016896	exoribonuclease activity, producing 5'-phosphomonoesters	1	1	1	1	g4289
GO:0017057	6-phosphogluconolactonase activity	1	1	1	1	g2737
GO:0017176	phosphatidylinositol N-acetylglucosaminyltransferase activity	1	1	1	1	g2971
GO:0018580	nitronate monooxygenase activity	1	1	1	1	g1541
GO:0019200	carbohydrate kinase activity	1	1	1	1	g15829
GO:0019238	cyclohydrolase activity	1	1	1	1	g4286
GO:0019706	protein-cysteine S-palmitoyltransferase activity	1	1	1	1	g11148
GO:0019707	protein-cysteine S-acyltransferase activity	1	1	1	1	g11148
GO:0019842	vitamin binding	1	1	1	1	g3034
GO:0019900	kinase binding	1	1	1	1	g4057
GO:0019901	protein kinase binding	1	1	1	1	g4057
GO:0030247	polysaccharide binding	1	1	1	1	g11568
GO:0030276	clathrin binding	1	1	1	1	g2477
GO:0030674	protein binding, bridging	1	1	1	1	g11042
GO:0030976	thiamine pyrophosphate binding	1	1	1	1	g3034
GO:0031406	carboxylic acid binding	1	1	1	1	g4762
GO:0031625	ubiquitin protein ligase binding	1	1	1	1	g11042
GO:0032131	alkylated DNA binding	1	1	1	1	g3374
GO:0032132	O6-alkylguanine-DNA binding	1	1	1	1	g3374
GO:0033592	RNA strand annealing activity	1	1	1	1	g7518
GO:0035004	phosphatidylinositol 3-kinase activity	1	1	1	1	g16101
GO:0036080	purine nucleotide-sugar transmembrane transporter activity	1	1	1	1	g8610
GO:0042134	rRNA primary transcript binding	1	1	1	1	g7282
GO:0042292	URM1 activating enzyme activity	1	1	1	1	g16006
GO:0042393	histone binding	1	1	1	1	g2663
GO:0042800	histone methyltransferase activity (H3-K4 specific)	1	1	1	1	g8536
GO:0043023	ribosomal large subunit binding	1	1	1	1	g13320
GO:0043177	organic acid binding	1	1	1	1	g4762
GO:0043178	alcohol binding	1	1	1	1	g15457
GO:0044212	transcription regulatory region DNA binding	1	1	1	1	g1057
GO:0044389	ubiquitin-like protein ligase binding	1	1	1	1	g11042
GO:0045140	inositol phosphoceramide synthase activity	1	1	1	1	g7416
GO:0045181	glutamate synthase activity, NAD(P)H as acceptor	1	1	1	1	g1559
GO:0045735	nutrient reservoir activity	1	1	1	1	g11148
GO:0046912	transferase activity, transferring acyl groups, acyl groups converted into alkyl on transfer	1	1	1	1	g15379
GO:0046915	transition metal ion transmembrane transporter activity	1	1	1	1	g15911
GO:0046943	carboxylic acid transmembrane transporter activity	1	1	1	1	g12425
GO:0047724	inosine nucleosidase activity	1	1	1	1	g8896
GO:0050113	inositol oxygenase activity	1	1	1	1	g14291
GO:0051082	unfolded protein binding	1	1	1	1	g15536
GO:0051087	chaperone binding	1	1	1	1	g795
GO:0051499	D-aminoacyl-tRNA deacylase activity	1	1	1	1	g218
GO:0051500	D-tyrosyl-tRNA(Tyr) deacylase activity	1	1	1	1	g218
GO:0051537	2 iron, 2 sulfur cluster binding	1	1	1	1	g1008
GO:0051538	3 iron, 4 sulfur cluster binding	1	1	1	1	g1559
GO:0051998	protein carboxyl O-methyltransferase activity	1	1	1	1	g2353
GO:0052742	phosphatidylinositol kinase activity	1	1	1	1	g16101
GO:0060090	binding, bridging	1	1	1	1	g11042
GO:0060590	ATPase regulator activity	1	1	1	1	g795
GO:0061134	peptidase regulator activity	1	1	1	1	g2663
GO:0061505	DNA topoisomerase II activity	1	1	1	1	g16122
GO:0061731	ribonucleoside-diphosphate reductase activity	1	1	1	1	g11554
GO:0070006	metalloaminopeptidase activity	1	1	1	1	g6579
GO:0070403	NAD+ binding	1	1	1	1	g7073
GO:0070566	adenylyltransferase activity	1	1	1	1	g16006
GO:0070567	cytidylyltransferase activity	1	1	1	1	g5678
GO:0070577	lysine-acetylated histone binding	1	1	1	1	g2663
GO:0070628	proteasome binding	1	1	1	1	g2663
GO:0070635	nicotinamide riboside hydrolase activity	1	1	1	1	g8896
GO:0070733	protein adenylyltransferase activity	1	1	1	1	g16006
GO:0070840	dynein complex binding	1	1	1	1	g7564
GO:0090599	alpha-glucosidase activity	1	1	1	1	g7594
GO:0097079	selenite:proton symporter activity	1	1	1	1	g15911
GO:0097617	annealing activity	1	1	1	1	g7518
GO:0098808	mRNA cap binding	1	1	1	1	g4832
GO:1901681	sulfur compound binding	1	1	1	1	g3034
GO:1990380	Lys48-specific deubiquitinase activity	1	1	1	1	g1347
GO:2001070	starch binding	1	1	1	1	g11568
