# Supplementary material for: A Comprehensive Assessment of Ultraviolet-Radiation-Induced Mutations in Flammulina filiformis Using Whole-Genome Resequencing
Source: MDPI journal article supplement (doi:10.3390/jof10030228), 2024-03-20
Supplement: s1 [file out.Level2.xls]

GO ID (level1)	GO Term (level1)	GO ID (level2)	GO Term (level2)	Gene Number(out)	Gene List (out)
reproduction	Biological Process	GO:0000003	reproduction	3	g672;g16006;g16122
metabolic process	Biological Process	GO:0008152	metabolic process	279	g15713;g2139;g15457;g5932;g8736;g4970;g1559;g3987;g7709;g4571;g13424;g9166;g8806;g8112;g760;g6334;g6286;g2737;g1768;g1715;g15835;g15207;g14381;g12204;g11142;g11016;g8896;g4832;g5803;g7932;g15421;g6194;g9820;g9793;g9745;g7095;g5786;g5462;g4041;g3911;g3037;g2603;g2491;g2186;g16075;g15244;g1438;g14321;g12159;g11145;g16161;g7729;g7569;g746;g433;g323;g13276;g10737;g6087;g10811;g10143;g16047;g1635;g110…
cellular process	Biological Process	GO:0009987	cellular process	294	g15713;g2139;g15457;g9478;g8736;g4970;g3250;g3247;g1559;g3987;g8896;g4832;g5803;g7932;g15421;g6194;g9820;g9793;g9745;g760;g7095;g5786;g5462;g4041;g3911;g3037;g2603;g2491;g2186;g16075;g15244;g1438;g14321;g12159;g11145;g16161;g7729;g7569;g746;g433;g323;g13276;g10737;g6087;g10811;g10143;g16047;g1635;g16101;g11042;g5719;g16122;g13214;g4910;g4289;g13019;g7749;g5849;g5674;g6254;g15911;g1768;g11142;g637…
reproductive process	Biological Process	GO:0022414	reproductive process	2	g672;g16122
signaling	Biological Process	GO:0023052	signaling	17	g16101;g7757;g7095;g6222;g5535;g4857;g4328;g2929;g2215;g15737;g15457;g7134;g2852;g2080;g8648;g10823;g1774
developmental process	Biological Process	GO:0032502	developmental process	1	g9133
growth	Biological Process	GO:0040007	growth	1	g16006
single-organism process	Biological Process	GO:0044699	single-organism process	226	g2139;g15457;g5932;g15911;g6710;g3250;g3247;g1559;g3987;g8896;g5803;g6962;g10983;g1553;g6087;g10143;g16101;g5719;g16122;g13214;g4910;g4289;g7749;g5849;g6254;g1768;g11142;g637;g672;g1160;g7757;g7095;g6222;g5535;g4857;g4328;g2929;g2215;g15737;g918;g2888;g3911;g504;g2509;g8536;g7449;g5903;g5515;g4580;g4571;g450;g4286;g13590;g11554;g9823;g9820;g9478;g868;g867;g8550;g8245;g7931;g7873;g7388;g7249;g5833…
response to stimulus	Biological Process	GO:0050896	response to stimulus	35	g9478;g16101;g13276;g13019;g7757;g7095;g6222;g5535;g4857;g4328;g2929;g2215;g15737;g3374;g15457;g15889;g7134;g2852;g15591;g15156;g6410;g5674;g16006;g15421;g2080;g4365;g11098;g2682;g8648;g10823;g15891;g3810;g10820;g1774;g8930
localization	Biological Process	GO:0051179	localization	91	g15911;g6710;g3250;g3247;g9823;g11240;g6962;g10983;g1553;g12208;g7665;g6814;g11825;g4537;g15457;g5997;g9672;g12425;g3805;g7564;g15156;g6410;g6522;g3660;g4773;g12434;g1203;g5719;g15306;g15714;g11098;g3866;g8930;g4153;g11986;g9797;g2595;g6164;g5237;g8610;g2737;g13911;g13320;g10417;g795;g8942;g15889;g5681;g918;g16240;g15837;g10390;g9169;g9126;g8730;g7854;g7149;g6632;g602;g5980;g5694;g562;g5595;g5564…
biological regulation	Biological Process	GO:0065007	biological regulation	68	g15889;g8930;g5803;g5719;g16122;g11986;g1635;g16101;g14315;g727;g7038;g4127;g637;g7757;g7095;g6222;g5535;g4857;g4328;g2929;g2215;g15737;g1057;g15457;g7134;g3445;g2852;g2663;g5742;g5191;g1809;g1491;g9478;g672;g9797;g11221;g10820;g7711;g475;g12208;g7590;g4057;g7873;g5932;g221;g16063;g16;g2080;g12225;g2399;g8648;g10823;g3788;g4833;g9010;g8545;g5312;g4421;g4319;g3128;g2219;g16006;g795;g1572;g2488;g17…
cellular component organization or biogenesis	Biological Process	GO:0071840	cellular component organization or biogenesis	48	g15457;g6087;g16047;g5719;g16122;g13214;g637;g672;g8536;g6095;g12037;g6376;g6593;g10820;g7564;g3788;g15889;g6138;g4773;g3445;g10811;g3822;g6125;g3337;g7282;g6281;g1160;g1048;g1635;g2324;g795;g5922;g15316;g9133;g1572;g2488;g4023;g6291;g13276;g13019;g4792;g12928;g12208;g15925;g11225;g12573;g4832;g5674
detoxification	Biological Process	GO:0098754	detoxification	2	g9478;g4365
transcription factor activity, protein binding	Molecular Function	GO:0000988	transcription factor activity, protein binding	1	g3788
nucleic acid binding transcription factor activity	Molecular Function	GO:0001071	nucleic acid binding transcription factor activity	9	g1057;g4833;g5312;g4319;g7873;g5932;g221;g16063;g16
catalytic activity	Molecular Function	GO:0003824	catalytic activity	361	g7709;g10811;g15889;g1347;g5719;g4623;g9478;g4989;g2857;g2579;g16023;g15455;g5755;g7134;g3128;g12412;g12080;g10901;g7777;g5593;g15207;g7453;g3988;g1559;g2697;g6194;g3416;g9793;g9745;g9261;g8973;g7590;g7095;g5786;g5462;g5344;g4041;g3911;g3037;g2603;g2491;g2186;g16276;g16075;g15244;g1438;g11145;g3987;g13424;g10915;g7614;g7267;g5191;g4829;g4821;g4337;g4211;g3429;g3374;g16296;g1577;g15739;g12710;g123…
structural molecule activity	Molecular Function	GO:0005198	structural molecule activity	11	g4023;g6095;g8771;g7633;g7300;g5417;g2983;g16140;g10700;g11542;g11324
transporter activity	Molecular Function	GO:0005215	transporter activity	40	g12208;g3660;g11825;g4153;g6522;g6164;g15837;g10390;g9672;g9169;g5595;g5237;g4281;g3153;g2508;g1838;g15584;g11279;g12425;g6962;g15911;g9915;g11986;g10983;g13321;g1203;g1553;g8610;g7359;g15156;g6410;g602;g5980;g5694;g562;g5564;g4232;g3034;g2357;g11098
binding	Molecular Function	GO:0005488	binding	282	g1008;g2477;g11042;g1635;g10811;g8679;g7564;g7432;g5932;g5922;g5719;g5393;g4671;g4319;g4217;g4094;g3810;g3697;g3128;g2807;g2488;g2464;g221;g16122;g16063;g16055;g16;g15889;g15316;g795;g3788;g1559;g5346;g3857;g278;g1636;g2663;g6194;g7729;g10182;g7449;g5903;g7249;g4571;g1685;g15104;g4832;g7073;g7709;g16161;g14774;g1233;g7908;g7873;g746;g7395;g7380;g7295;g6342;g6125;g5912;g5001;g323;g2571;g2513;g2313…
electron carrier activity	Molecular Function	GO:0009055	electron carrier activity	1	g1110
antioxidant activity	Molecular Function	GO:0016209	antioxidant activity	1	g9478
nutrient reservoir activity	Molecular Function	GO:0045735	nutrient reservoir activity	1	g11148
molecular function regulator	Molecular Function	GO:0098772	molecular function regulator	11	g727;g7038;g4127;g7590;g4057;g904;g1809;g795;g9797;g11221;g2663
extracellular region	Cellular Component	GO:0005576	extracellular region	2	g11542;g11324
cell	Cellular Component	GO:0005623	cell	160	g4211;g15457;g4217;g16047;g475;g672;g12573;g4832;g5803;g7932;g4970;g11042;g16122;g2556;g2756;g4782;g10417;g2595;g6291;g2324;g5681;g1635;g13911;g6087;g7564;g2663;g3337;g5719;g15889;g14381;g5535;g1118;g9797;g11542;g11324;g918;g7665;g6962;g8973;g9010;g13964;g5997;g15306;g6125;g15891;g10182;g10820;g4023;g11225;g13214;g12620;g12204;g4365;g3822;g6376;g10811;g9081;g7908;g7873;g7711;g7432;g6814;g6342;g59…
membrane	Cellular Component	GO:0016020	membrane	216	g4211;g15457;g9797;g6464;g7440;g527;g470;g2520;g15880;g15282;g13959;g13424;g12113;g10811;g9946;g9578;g9140;g867;g8548;g8545;g848;g8316;g8277;g7919;g7820;g766;g7267;g7095;g6599;g4671;g4514;g3866;g3805;g316;g3060;g2929;g2855;g2737;g2723;g2399;g1884;g15809;g1562;g15420;g14466;g14064;g14022;g13998;g13874;g13864;g12451;g1234;g12048;g11646;g1164;g11476;g11324;g11240;g1110;g11003;g10791;g1057;g10401;g10…
membrane-enclosed lumen	Cellular Component	GO:0031974	membrane-enclosed lumen	22	g475;g2556;g2756;g16122;g1635;g6087;g5719;g9010;g13964;g7282;g6593;g2488;g8625;g5674;g3988;g11225;g3810;g15889;g2913;g13019;g8536;g3857
macromolecular complex	Cellular Component	GO:0032991	macromolecular complex	64	g15457;g4217;g16047;g475;g12573;g4832;g5803;g7932;g4970;g11042;g2556;g2756;g4782;g2324;g5681;g6087;g2663;g5719;g15889;g14381;g9010;g6125;g10820;g3788;g2913;g13019;g13214;g3822;g13964;g6095;g8771;g7633;g7300;g5417;g3457;g2983;g16140;g15455;g7746;g3250;g3247;g10823;g2488;g637;g7564;g11225;g4289;g3810;g904;g7449;g5903;g5023;g2380;g8536;g2080;g7590;g7416;g3697;g12208;g1491;g7665;g16122;g7282;g795
organelle	Cellular Component	GO:0043226	organelle	119	g4211;g15457;g4217;g9797;g475;g672;g16122;g2556;g2756;g4782;g10417;g2595;g6291;g1635;g13911;g6087;g7564;g3337;g5719;g15889;g5535;g1118;g918;g7665;g6962;g9010;g13964;g5997;g15306;g6125;g15891;g8973;g10182;g10820;g4023;g11225;g13214;g4365;g3822;g6376;g10811;g9081;g7908;g7873;g7711;g7432;g6814;g6342;g5932;g5922;g5393;g4674;g4671;g4094;g3788;g3693;g3076;g2682;g2464;g221;g16063;g16;g15714;g15421;g1531…
organelle part	Cellular Component	GO:0044422	organelle part	56	g4211;g15457;g4217;g9797;g475;g672;g16122;g2556;g2756;g4782;g10417;g1635;g13911;g6087;g7564;g3337;g5719;g15889;g6962;g9010;g13964;g5997;g15306;g6125;g10820;g4023;g11225;g13214;g3822;g12208;g7203;g7282;g6593;g637;g2380;g2488;g1160;g8625;g5674;g3988;g3810;g15452;g2080;g16101;g3445;g5023;g2913;g13019;g8536;g7416;g3697;g7665;g3857;g11946;g470;g795
membrane part	Cellular Component	GO:0044425	membrane part	150	g15457;g10417;g9271;g8625;g6164;g5377;g4571;g450;g4435;g16240;g15837;g1553;g15156;g10390;g9958;g9915;g9823;g9820;g9672;g96;g918;g9169;g9166;g9126;g9055;g8973;g8957;g8942;g8730;g8610;g8558;g842;g7854;g7810;g7777;g760;g7499;g7416;g7359;g7203;g7185;g7149;g6667;g6632;g6522;g6497;g6410;g6286;g5980;g5810;g5694;g5678;g5636;g562;g5595;g5593;g5564;g5499;g5417;g5404;g5237;g5023;g4989;g4762;g4674;g4665;g451…
cell part	Cellular Component	GO:0044464	cell part	157	g4211;g15457;g4217;g16047;g475;g672;g12573;g4832;g5803;g7932;g4970;g11042;g16122;g2556;g2756;g4782;g10417;g2595;g6291;g2324;g5681;g1635;g13911;g6087;g7564;g2663;g3337;g5719;g15889;g14381;g5535;g1118;g9797;g11542;g11324;g918;g7665;g6962;g8973;g9010;g13964;g5997;g15306;g6125;g15891;g10182;g10820;g4023;g11225;g13214;g12620;g12204;g4365;g3822;g6376;g10811;g9081;g7908;g7873;g7711;g7432;g6814;g6342;g59…
supramolecular fiber	Cellular Component	GO:0099512	supramolecular fiber	2	g7564;g4023
