# Supplementary material for: A Comprehensive Assessment of Ultraviolet-Radiation-Induced Mutations in Flammulina filiformis Using Whole-Genome Resequencing
Source: MDPI journal article supplement (doi:10.3390/jof10030228), 2024-03-20
Supplement: s1 [file out.P.xls]

GO ID	Description	GeneRatio (419)	BgRatio (419)	pvalue	fdr	geneID
GO:0009987	cellular process	294	294	1	1	g15713;g2139;g15457;g9478;g8736;g4970;g3250;g3247;g1559;g3987;g8896;g4832;g5803;g7932;g15421;g6194;g9820;g9793;g9745;g760;g7095;g5786;g5462;g4041;g3911;g3037;g2603;g2491;g2186;g16075;g15244;g1438;g14321;g12159;g11145;g16161;g7729;g7569;g746;g433;g323;g13276;g10737;g6087;g10811;g10143;g16047;g1635;g16101;g11042;g5719;g16122;g13214;g4910;g4289;g13019;g7749;g5849;g5674;g6254;g15911;g1768;g11142;g637…
GO:0008152	metabolic process	279	279	1	1	g15713;g2139;g15457;g5932;g8736;g4970;g1559;g3987;g7709;g4571;g13424;g9166;g8806;g8112;g760;g6334;g6286;g2737;g1768;g1715;g15835;g15207;g14381;g12204;g11142;g11016;g8896;g4832;g5803;g7932;g15421;g6194;g9820;g9793;g9745;g7095;g5786;g5462;g4041;g3911;g3037;g2603;g2491;g2186;g16075;g15244;g1438;g14321;g12159;g11145;g16161;g7729;g7569;g746;g433;g323;g13276;g10737;g6087;g10811;g10143;g16047;g1635;g110…
GO:0044699	single-organism process	226	226	1	1	g2139;g15457;g5932;g15911;g6710;g3250;g3247;g1559;g3987;g8896;g5803;g6962;g10983;g1553;g6087;g10143;g16101;g5719;g16122;g13214;g4910;g4289;g7749;g5849;g6254;g1768;g11142;g637;g672;g1160;g7757;g7095;g6222;g5535;g4857;g4328;g2929;g2215;g15737;g918;g2888;g3911;g504;g2509;g8536;g7449;g5903;g5515;g4580;g4571;g450;g4286;g13590;g11554;g9823;g9820;g9478;g868;g867;g8550;g8245;g7931;g7873;g7388;g7249;g5833…
GO:0071704	organic substance metabolic process	212	212	1	1	g15713;g2139;g15457;g5932;g8736;g4970;g1559;g3987;g7709;g4571;g13424;g9166;g8806;g8112;g760;g6334;g6286;g2737;g1768;g1715;g15835;g15207;g14381;g12204;g11142;g11016;g8896;g4832;g5803;g7932;g15421;g16161;g7729;g7569;g746;g433;g323;g13276;g10737;g6087;g10811;g10143;g1635;g11042;g5719;g4910;g4289;g7749;g5849;g5674;g6254;g15889;g672;g1160;g16122;g918;g2888;g7757;g3911;g1347;g504;g2509;g8536;g3374;g756…
GO:0044238	primary metabolic process	204	204	1	1	g15713;g2139;g5932;g8736;g4970;g1559;g3987;g7709;g4571;g13424;g9166;g8806;g8112;g760;g6334;g6286;g2737;g1768;g1715;g15835;g15207;g14381;g12204;g11142;g11016;g8896;g4832;g5803;g7932;g15421;g16161;g7729;g7569;g746;g433;g323;g13276;g10737;g6087;g10811;g10143;g1635;g11042;g5719;g4910;g4289;g7749;g5674;g6254;g15889;g672;g1160;g16122;g918;g2888;g7757;g3911;g1347;g504;g2509;g8536;g3374;g7564;g16055;g601…
GO:0044237	cellular metabolic process	199	199	1	1	g15713;g2139;g15457;g8736;g4970;g1559;g3987;g8896;g4832;g5803;g7932;g15421;g6194;g9820;g9793;g9745;g760;g7095;g5786;g5462;g4041;g3911;g3037;g2603;g2491;g2186;g16075;g15244;g1438;g14321;g12159;g11145;g16161;g7729;g7569;g746;g433;g323;g13276;g10737;g6087;g10811;g10143;g1635;g11042;g5719;g4910;g4289;g7749;g5849;g5674;g6254;g1768;g11142;g15889;g672;g1160;g16122;g8973;g5344;g10182;g918;g2888;g1347;g50…
GO:0044763	single-organism cellular process	163	163	1	1	g2139;g15457;g3250;g3247;g1559;g3987;g8896;g5803;g6087;g10143;g16101;g5719;g16122;g13214;g4910;g4289;g7749;g5849;g6254;g15911;g1768;g11142;g637;g672;g1160;g7757;g7095;g6222;g5535;g4857;g4328;g2929;g2215;g15737;g918;g2888;g504;g2509;g8536;g3374;g12208;g6012;g1110;g1598;g6095;g15889;g6962;g5806;g12037;g7564;g7134;g9820;g11145;g10348;g3076;g3988;g1994;g2852;g7225;g3697;g3115;g11042;g9478;g10820;g502…
GO:0043170	macromolecule metabolic process	133	133	1	1	g15713;g8736;g4970;g4832;g5803;g7932;g15421;g16161;g7729;g7569;g746;g433;g323;g13276;g10737;g6087;g1635;g11042;g5719;g4289;g5674;g15889;g672;g1160;g16122;g1347;g8536;g3374;g7564;g16055;g6095;g4782;g11117;g5755;g12258;g9743;g8930;g7711;g7134;g4311;g3128;g2610;g2229;g1571;g1467;g12412;g10901;g12037;g3857;g9081;g2764;g2983;g10152;g15356;g16006;g759;g2488;g3788;g11330;g6194;g904;g11554;g7432;g5393;g3…
GO:0044710	single-organism metabolic process	125	125	1	1	g2139;g15457;g5932;g1559;g3987;g8896;g6087;g10143;g4910;g4289;g7749;g5849;g6254;g1768;g11142;g672;g1160;g918;g2888;g7757;g3911;g504;g2509;g8536;g7449;g5903;g5515;g4580;g4571;g450;g4286;g13590;g11554;g9823;g9820;g9478;g868;g867;g8550;g8245;g7931;g7873;g7388;g7249;g5833;g5810;g5806;g5634;g5346;g4989;g4665;g4637;g3857;g3274;g3178;g3076;g2857;g2807;g278;g2770;g2579;g2454;g244;g207;g1636;g16023;g15680…
GO:0006807	nitrogen compound metabolic process	118	118	1	1	g15713;g2139;g8736;g4970;g1559;g3987;g8896;g4832;g5803;g7932;g15421;g16161;g7729;g7569;g746;g433;g323;g13276;g10737;g10811;g10143;g1635;g6087;g5719;g4289;g7749;g672;g16122;g918;g2888;g504;g2509;g3374;g7564;g16055;g6012;g1110;g6095;g15889;g4782;g11117;g5806;g3857;g9081;g9820;g15356;g16006;g759;g2488;g3788;g11145;g10348;g3076;g3988;g904;g1994;g7225;g11554;g7432;g5393;g3810;g3693;g12225;g10182;g1082…
GO:0044260	cellular macromolecule metabolic process	112	112	1	1	g15713;g8736;g4970;g4832;g16161;g7729;g7569;g746;g433;g323;g13276;g10737;g6087;g1635;g11042;g5719;g4289;g5674;g15889;g672;g1160;g16122;g1347;g8536;g3374;g7564;g16055;g6095;g4782;g11117;g5803;g5755;g12258;g9743;g8930;g7711;g7134;g4311;g3128;g2610;g2229;g1571;g1467;g12412;g10901;g12037;g3857;g9081;g2764;g2983;g10152;g15356;g16006;g759;g2488;g3788;g11330;g904;g11554;g7432;g5393;g3810;g3693;g12225;g1…
GO:0034641	cellular nitrogen compound metabolic process	94	94	1	1	g15713;g2139;g8736;g4970;g8896;g4832;g3987;g5803;g7932;g15421;g16161;g7729;g7569;g746;g433;g323;g13276;g10737;g10811;g1635;g6087;g5719;g4289;g7749;g672;g16122;g10143;g504;g2509;g3374;g7564;g16055;g6012;g1110;g6095;g15889;g4782;g11117;g3857;g9081;g15356;g16006;g759;g2488;g3788;g11145;g10348;g904;g11554;g7432;g5393;g3810;g3693;g12225;g10182;g10820;g502;g4061;g8771;g7300;g5417;g2983;g16140;g6138;g38…
GO:0051179	localization	91	91	1	1	g15911;g6710;g3250;g3247;g9823;g11240;g6962;g10983;g1553;g12208;g7665;g6814;g11825;g4537;g15457;g5997;g9672;g12425;g3805;g7564;g15156;g6410;g6522;g3660;g4773;g12434;g1203;g5719;g15306;g15714;g11098;g3866;g8930;g4153;g11986;g9797;g2595;g6164;g5237;g8610;g2737;g13911;g13320;g10417;g795;g8942;g15889;g5681;g918;g16240;g15837;g10390;g9169;g9126;g8730;g7854;g7149;g6632;g602;g5980;g5694;g562;g5595;g5564…
GO:0051234	establishment of localization	89	89	1	1	g15911;g6710;g3250;g3247;g9823;g11240;g6962;g10983;g1553;g12208;g7665;g6814;g11825;g4537;g15457;g5997;g9672;g12425;g7564;g15156;g6410;g6522;g3660;g4773;g12434;g1203;g5719;g15306;g15714;g11098;g3866;g4153;g11986;g9797;g2595;g6164;g5237;g8610;g2737;g13911;g13320;g10417;g795;g8942;g15889;g5681;g918;g16240;g15837;g10390;g9169;g9126;g8730;g7854;g7149;g6632;g602;g5980;g5694;g562;g5595;g5564;g4674;g4281…
GO:0006810	transport	87	87	1	1	g15911;g6710;g3250;g3247;g9823;g11240;g6962;g10983;g1553;g12208;g7665;g6814;g11825;g4537;g15457;g5997;g9672;g12425;g15156;g6410;g6522;g3660;g4773;g12434;g1203;g15306;g15714;g11098;g3866;g4153;g11986;g9797;g2595;g6164;g5237;g8610;g2737;g13911;g13320;g10417;g795;g8942;g15889;g5681;g918;g16240;g15837;g10390;g9169;g9126;g8730;g7854;g7149;g6632;g602;g5980;g5694;g562;g5595;g5564;g4674;g4281;g4232;g4083…
GO:0006725	cellular aromatic compound metabolic process	86	86	1	1	g15713;g2139;g8736;g4970;g8896;g3987;g5803;g7932;g15421;g16161;g7729;g7569;g746;g433;g323;g13276;g10737;g10811;g10143;g1635;g6087;g5719;g4289;g7749;g672;g16122;g504;g2509;g3374;g7564;g16055;g6012;g1110;g6095;g15889;g4782;g11117;g3857;g9081;g9820;g16006;g759;g2488;g3788;g11145;g10348;g1994;g11554;g7432;g5393;g3810;g3693;g10182;g10820;g502;g4061;g6138;g8245;g11984;g11950;g3822;g6334;g2737;g6125;g15…
GO:1901360	organic cyclic compound metabolic process	85	85	1	1	g15713;g2139;g8736;g4970;g8896;g3987;g5803;g7932;g15421;g16161;g7729;g7569;g746;g433;g323;g13276;g10737;g10811;g10143;g1635;g6087;g5719;g4289;g7749;g672;g16122;g504;g2509;g3374;g7564;g16055;g6012;g1110;g6095;g15889;g4782;g11117;g3857;g9081;g9820;g16006;g759;g2488;g3788;g11145;g10348;g1994;g11554;g7432;g5393;g3810;g3693;g10182;g10820;g502;g4061;g6138;g3822;g4821;g6334;g2737;g6125;g15714;g15134;g26…
GO:0046483	heterocycle metabolic process	83	83	1	1	g15713;g2139;g8736;g4970;g8896;g3987;g5803;g7932;g15421;g16161;g7729;g7569;g746;g433;g323;g13276;g10737;g10811;g1635;g6087;g5719;g4289;g7749;g672;g16122;g10143;g504;g2509;g3374;g7564;g16055;g6012;g1110;g6095;g15889;g4782;g11117;g3857;g9081;g16006;g759;g2488;g3788;g11145;g10348;g4821;g11554;g7432;g5393;g3810;g3693;g10182;g10820;g502;g4061;g6138;g3822;g6334;g2737;g6125;g15714;g15134;g2682;g7873;g74…
GO:0009058	biosynthetic process	79	79	1	1	g2139;g15457;g5932;g1559;g4832;g3987;g16047;g1635;g6087;g5719;g7749;g1160;g504;g2509;g7564;g16055;g6012;g6095;g9081;g9820;g7203;g15356;g759;g2488;g3788;g3076;g3988;g904;g4821;g16122;g7225;g11554;g7432;g5393;g3810;g3693;g12225;g7449;g5903;g10182;g502;g15889;g7614;g4061;g8771;g7300;g5417;g2983;g16140;g10711;g15455;g8625;g4580;g4435;g8896;g4623;g4211;g16101;g7633;g918;g3291;g2888;g2451;g12200;g11145…
GO:0006139	nucleobase-containing compound metabolic process	77	77	1	1	g15713;g2139;g8736;g4970;g8896;g5803;g7932;g15421;g16161;g7729;g7569;g746;g433;g323;g13276;g10737;g10811;g1635;g6087;g5719;g4289;g7749;g672;g16122;g504;g2509;g3374;g7564;g16055;g6012;g1110;g6095;g15889;g4782;g11117;g3857;g9081;g16006;g759;g2488;g3788;g11145;g10348;g11554;g7432;g5393;g3810;g3693;g10182;g10820;g4061;g6138;g3822;g6334;g2737;g6125;g15714;g2682;g7873;g7453;g7282;g6281;g15891;g10143;g2…
GO:0019538	protein metabolic process	75	75	1	1	g4832;g6087;g11042;g5674;g15889;g1160;g1347;g8536;g6095;g5803;g5755;g12258;g9743;g8930;g7711;g7134;g4311;g3128;g2610;g2229;g1571;g1467;g12412;g10901;g12037;g2764;g2983;g10152;g904;g12225;g4061;g8771;g7300;g5417;g16140;g9209;g577;g3457;g16006;g4821;g10700;g12146;g7307;g5633;g7633;g2152;g15513;g10256;g9081;g759;g7518;g3788;g2556;g470;g16122;g11041;g2353;g8010;g6247;g821;g3137;g12080;g2971;g4643;g65…
GO:1902578	single-organism localization	73	73	1	1	g15911;g6710;g3250;g3247;g6962;g10983;g1553;g12208;g11825;g4537;g15457;g9672;g12425;g7564;g15156;g6410;g6522;g7665;g3660;g12434;g1203;g15714;g11098;g3866;g4153;g11986;g9797;g2595;g6164;g5237;g8610;g795;g8942;g15889;g16240;g15837;g10390;g9169;g9126;g8730;g7854;g7149;g6632;g602;g5980;g5694;g562;g5595;g5564;g4674;g4281;g4232;g4083;g3153;g3034;g2588;g2508;g2357;g1838;g15641;g15584;g1539;g15357;g12944…
GO:0044765	single-organism transport	72	72	1	1	g15911;g6710;g3250;g3247;g6962;g10983;g1553;g12208;g11825;g4537;g15457;g9672;g12425;g15156;g6410;g6522;g7665;g3660;g12434;g1203;g15714;g11098;g3866;g4153;g11986;g9797;g2595;g6164;g5237;g8610;g795;g8942;g15889;g16240;g15837;g10390;g9169;g9126;g8730;g7854;g7149;g6632;g602;g5980;g5694;g562;g5595;g5564;g4674;g4281;g4232;g4083;g3153;g3034;g2588;g2508;g2357;g1838;g15641;g15584;g1539;g15357;g12944;g1222…
GO:1901576	organic substance biosynthetic process	72	72	1	1	g2139;g15457;g5932;g1559;g4832;g3987;g1635;g6087;g5719;g7749;g1160;g504;g2509;g7564;g16055;g6012;g6095;g9081;g9820;g15356;g759;g2488;g3788;g3076;g3988;g904;g4821;g16122;g7225;g11554;g7432;g5393;g3810;g3693;g12225;g10182;g502;g15889;g7614;g4061;g8771;g7300;g5417;g2983;g16140;g10711;g15455;g8625;g4580;g4435;g7449;g5903;g8896;g4623;g4211;g16101;g7633;g7203;g11145;g7518;g2556;g7249;g10143;g7416;g5678…
GO:0044249	cellular biosynthetic process	71	71	1	1	g2139;g15457;g1559;g4832;g3987;g1635;g6087;g5719;g7749;g1160;g504;g2509;g7564;g16055;g6012;g6095;g9081;g9820;g7203;g15356;g759;g2488;g3788;g3076;g3988;g904;g4821;g16122;g7225;g11554;g7432;g5393;g3810;g3693;g12225;g7449;g5903;g10182;g502;g15889;g7614;g4061;g8771;g7300;g5417;g2983;g16140;g10711;g15455;g8625;g4580;g8896;g4623;g4211;g16101;g7633;g11145;g7518;g2556;g7249;g10143;g7416;g5678;g11041;g428…
GO:0065007	biological regulation	68	68	1	1	g15889;g8930;g5803;g5719;g16122;g11986;g1635;g16101;g14315;g727;g7038;g4127;g637;g7757;g7095;g6222;g5535;g4857;g4328;g2929;g2215;g15737;g1057;g15457;g7134;g3445;g2852;g2663;g5742;g5191;g1809;g1491;g9478;g672;g9797;g11221;g10820;g7711;g475;g12208;g7590;g4057;g7873;g5932;g221;g16063;g16;g2080;g12225;g2399;g8648;g10823;g3788;g4833;g9010;g8545;g5312;g4421;g4319;g3128;g2219;g16006;g795;g1572;g2488;g17…
GO:0006793	phosphorus metabolic process	67	67	1	1	g2139;g15457;g6194;g9820;g9793;g9745;g760;g7095;g5786;g5462;g4041;g3911;g3037;g2603;g2491;g2186;g16075;g15244;g1438;g14321;g12159;g11145;g7749;g15889;g8973;g5344;g10182;g6012;g1110;g5803;g5755;g12258;g9743;g8930;g7711;g7134;g4311;g3128;g2610;g2229;g1571;g1467;g12412;g10901;g2764;g2983;g10152;g4821;g15911;g15829;g15282;g15549;g8896;g6334;g2737;g4211;g16101;g14381;g504;g2509;g470;g16122;g7416;g1014…
GO:0055114	oxidation-reduction process	67	67	1	1	g4910;g4289;g1559;g7449;g5903;g5515;g4580;g4571;g450;g4286;g13590;g11554;g9823;g9820;g9478;g868;g867;g8550;g8245;g7931;g7873;g7388;g7249;g5849;g5833;g5810;g5806;g5634;g5346;g4989;g4665;g4637;g3857;g3274;g3178;g3076;g2857;g2807;g278;g2770;g2579;g2454;g244;g2139;g207;g1636;g16023;g15680;g15609;g15480;g15455;g15420;g1541;g15134;g15123;g14381;g14291;g11984;g11950;g11418;g10711;g10204;g10143;g1008;g11…
GO:0006796	phosphate-containing compound metabolic process	66	66	1	1	g2139;g6194;g9820;g9793;g9745;g760;g7095;g5786;g5462;g4041;g3911;g3037;g2603;g2491;g2186;g16075;g15457;g15244;g1438;g14321;g12159;g11145;g7749;g15889;g8973;g5344;g10182;g6012;g1110;g5803;g5755;g12258;g9743;g8930;g7711;g7134;g4311;g3128;g2610;g2229;g1571;g1467;g12412;g10901;g2764;g2983;g10152;g15829;g15282;g15549;g4821;g8896;g6334;g2737;g4211;g16101;g14381;g504;g2509;g470;g16122;g7416;g10143;g5678…
GO:0050789	regulation of biological process	64	64	1	1	g15889;g8930;g5803;g5719;g16122;g1635;g16101;g14315;g727;g7038;g4127;g637;g7757;g7095;g6222;g5535;g4857;g4328;g2929;g2215;g15737;g1057;g15457;g7134;g2852;g2663;g5742;g5191;g1809;g1491;g9478;g672;g9797;g11221;g7711;g475;g7590;g4057;g7873;g5932;g221;g16063;g16;g2080;g12225;g8648;g10823;g4833;g9010;g8545;g5312;g4421;g4319;g3788;g3128;g2219;g11986;g16006;g795;g1572;g2488;g1774;g3697;g15911
GO:0044267	cellular protein metabolic process	62	62	1	1	g4832;g6087;g11042;g5674;g15889;g1160;g1347;g8536;g6095;g5803;g5755;g12258;g9743;g8930;g7711;g7134;g4311;g3128;g2610;g2229;g1571;g1467;g12412;g10901;g12037;g2764;g2983;g10152;g904;g12225;g4061;g8771;g7300;g5417;g16140;g9209;g577;g3457;g16006;g4821;g7307;g5633;g7633;g2152;g15513;g10256;g9081;g759;g7518;g3788;g2556;g470;g16122;g11041;g2353;g8010;g6247;g821;g3137;g12080;g2971;g12573
GO:0050794	regulation of cellular process	60	60	1	1	g15889;g8930;g5719;g16122;g1635;g16101;g14315;g727;g7038;g4127;g637;g7757;g7095;g6222;g5535;g4857;g4328;g2929;g2215;g15737;g1057;g15457;g7134;g2852;g2663;g5742;g5191;g1809;g1491;g9478;g672;g475;g7590;g4057;g7873;g5932;g221;g16063;g16;g7711;g2080;g12225;g8648;g10823;g4833;g9010;g8545;g5312;g4421;g4319;g3788;g3128;g2219;g11986;g16006;g1572;g2488;g1774;g3697;g15911
GO:0090304	nucleic acid metabolic process	59	59	1	1	g15713;g8736;g4970;g5803;g7932;g15421;g16161;g7729;g7569;g746;g433;g323;g13276;g10737;g1635;g6087;g5719;g4289;g672;g16122;g3374;g7564;g16055;g6095;g15889;g4782;g11117;g3857;g9081;g16006;g759;g2488;g3788;g11554;g7432;g5393;g3810;g3693;g10820;g4061;g6138;g3822;g6125;g15714;g2682;g7453;g7282;g6281;g15891;g2324;g11041;g7908;g1377;g2194;g1333;g6254;g3076;g6537;g11946
GO:1901564	organonitrogen compound metabolic process	57	57	1	1	g1559;g3987;g8896;g4832;g10143;g7749;g918;g2888;g504;g2509;g6012;g1110;g6095;g5806;g9820;g11145;g10348;g3076;g3988;g904;g1994;g7225;g12225;g502;g4061;g8771;g7300;g5417;g2983;g16140;g8625;g4580;g4435;g7449;g5903;g4821;g6334;g2737;g4211;g15134;g4762;g2451;g7633;g7873;g9081;g759;g7518;g3788;g2556;g7249;g7416;g3274;g15480;g11041;g4286;g5344;g12573
GO:0044281	small molecule metabolic process	51	51	1	1	g2139;g15457;g5932;g1559;g3987;g8896;g10143;g4910;g4289;g7749;g5849;g918;g2888;g504;g2509;g6012;g1110;g1598;g6095;g5806;g9820;g11145;g10348;g3076;g3988;g1994;g7225;g15911;g502;g4061;g10711;g15455;g8625;g4580;g7449;g5903;g6334;g2737;g15829;g15134;g4762;g2451;g7873;g14291;g7249;g3274;g15480;g11041;g1685;g4286;g14321
GO:0055085	transmembrane transport	51	51	1	1	g15911;g12208;g6962;g6522;g3660;g11098;g4153;g11986;g8610;g795;g6164;g16240;g15837;g15156;g10390;g9672;g9169;g9126;g8730;g7854;g7149;g6632;g6410;g602;g5980;g5694;g562;g5595;g5564;g5237;g4674;g4281;g4232;g4083;g3153;g3034;g2588;g2508;g2357;g1838;g15641;g15584;g1539;g15357;g12944;g12434;g12224;g11365;g11279;g7359;g9915
GO:0071840	cellular component organization or biogenesis	48	48	1	1	g15457;g6087;g16047;g5719;g16122;g13214;g637;g672;g8536;g6095;g12037;g6376;g6593;g10820;g7564;g3788;g15889;g6138;g4773;g3445;g10811;g3822;g6125;g3337;g7282;g6281;g1160;g1048;g1635;g2324;g795;g5922;g15316;g9133;g1572;g2488;g4023;g6291;g13276;g13019;g4792;g12928;g12208;g15925;g11225;g12573;g4832;g5674
GO:0043412	macromolecule modification	45	45	1	1	g15713;g6087;g15889;g1160;g1347;g8536;g3374;g5803;g5755;g12258;g9743;g8930;g7711;g7134;g4311;g3128;g2610;g2229;g1571;g1467;g12412;g10901;g12037;g3857;g2764;g2983;g10152;g16006;g7307;g5633;g3457;g11042;g2152;g15513;g10256;g6281;g470;g16122;g2353;g8010;g6247;g821;g12080;g2971;g9209
GO:0010467	gene expression	43	43	1	1	g8736;g4970;g4832;g1635;g6087;g5719;g7564;g16055;g6095;g4782;g11117;g3857;g9081;g16006;g759;g2488;g3788;g904;g12225;g15889;g4061;g8771;g7300;g5417;g2983;g16140;g6138;g3822;g6125;g10700;g15714;g7633;g7518;g2556;g7282;g6281;g3908;g15356;g2324;g11041;g6254;g3076;g12573
GO:1901566	organonitrogen compound biosynthetic process	42	42	1	1	g1559;g4832;g3987;g7749;g504;g2509;g6012;g6095;g9820;g3076;g3988;g904;g7225;g12225;g502;g4061;g8771;g7300;g5417;g2983;g16140;g8625;g4580;g4435;g7449;g5903;g8896;g4211;g7633;g9081;g759;g7518;g3788;g2556;g7249;g4821;g10143;g7416;g11041;g4286;g4762;g12573
GO:0006464	cellular protein modification process	41	41	1	1	g6087;g15889;g1160;g1347;g8536;g5803;g5755;g12258;g9743;g8930;g7711;g7134;g4311;g3128;g2610;g2229;g1571;g1467;g12412;g10901;g12037;g2764;g2983;g10152;g16006;g7307;g5633;g3457;g11042;g2152;g15513;g10256;g470;g16122;g2353;g8010;g6247;g821;g12080;g2971;g9209
GO:0016043	cellular component organization	41	41	1	1	g15457;g6087;g16047;g5719;g16122;g13214;g637;g672;g8536;g6095;g12037;g10820;g7564;g3788;g15889;g6138;g4773;g3445;g10811;g3822;g6125;g3337;g7282;g1048;g795;g5922;g15316;g9133;g1572;g2488;g4023;g6291;g13276;g13019;g4792;g12928;g12208;g11225;g12573;g4832;g5674
GO:0016310	phosphorylation	41	41	1	1	g6194;g9820;g9793;g9745;g760;g7095;g5786;g5462;g4041;g3911;g3037;g2603;g2491;g2186;g16075;g15457;g15244;g1438;g14321;g12159;g11145;g15889;g1110;g5803;g5755;g12258;g9743;g8930;g7711;g7134;g4311;g3128;g2610;g2229;g1571;g1467;g12412;g10901;g15829;g16101;g12080
GO:0036211	protein modification process	41	41	1	1	g6087;g15889;g1160;g1347;g8536;g5803;g5755;g12258;g9743;g8930;g7711;g7134;g4311;g3128;g2610;g2229;g1571;g1467;g12412;g10901;g12037;g2764;g2983;g10152;g16006;g7307;g5633;g3457;g11042;g2152;g15513;g10256;g470;g16122;g2353;g8010;g6247;g821;g12080;g2971;g9209
GO:0044271	cellular nitrogen compound biosynthetic process	41	41	1	1	g2139;g4832;g3987;g1635;g6087;g5719;g7749;g504;g2509;g7564;g16055;g6012;g6095;g9081;g15356;g759;g2488;g3788;g904;g12225;g10182;g502;g15889;g4061;g8771;g7300;g5417;g2983;g16140;g7432;g3810;g8896;g7633;g11145;g7518;g2556;g10143;g11041;g8806;g4762;g12573
GO:0019222	regulation of metabolic process	39	39	1	1	g5803;g5719;g16122;g15889;g1635;g14315;g1057;g8930;g2663;g672;g9797;g11221;g7711;g475;g7590;g4057;g7873;g5932;g221;g16063;g16;g12225;g4857;g4328;g2929;g15737;g4833;g9010;g8545;g5312;g4421;g4319;g3788;g3128;g2219;g11986;g795;g2488;g3697
GO:0009059	macromolecule biosynthetic process	36	36	1	1	g4832;g1635;g6087;g5719;g1160;g7564;g16055;g6095;g9081;g15356;g759;g2488;g3788;g904;g16122;g11554;g7432;g5393;g3810;g3693;g12225;g15889;g4061;g8771;g7300;g5417;g2983;g16140;g4435;g4623;g7633;g7518;g2556;g11041;g2971;g12573
GO:0044711	single-organism biosynthetic process	36	36	1	1	g2139;g15457;g5932;g1559;g7749;g504;g2509;g6012;g6095;g9820;g3076;g3988;g7225;g502;g7614;g10711;g15455;g8625;g4580;g4435;g7449;g5903;g8896;g4623;g4211;g16101;g11145;g7249;g10143;g7416;g5678;g4286;g12130;g821;g2971;g4762
GO:0034645	cellular macromolecule biosynthetic process	35	35	1	1	g4832;g1635;g6087;g5719;g1160;g7564;g16055;g6095;g9081;g15356;g759;g2488;g3788;g904;g16122;g11554;g7432;g5393;g3810;g3693;g12225;g15889;g4061;g8771;g7300;g5417;g2983;g16140;g4623;g7633;g7518;g2556;g11041;g2971;g12573
GO:0050896	response to stimulus	35	35	1	1	g9478;g16101;g13276;g13019;g7757;g7095;g6222;g5535;g4857;g4328;g2929;g2215;g15737;g3374;g15457;g15889;g7134;g2852;g15591;g15156;g6410;g5674;g16006;g15421;g2080;g4365;g11098;g2682;g8648;g10823;g15891;g3810;g10820;g1774;g8930
GO:0006082	organic acid metabolic process	34	34	1	1	g15457;g1559;g3987;g10143;g4910;g4289;g5849;g918;g2888;g6095;g5806;g9820;g3076;g3988;g1994;g7225;g15911;g502;g4061;g10711;g15455;g8625;g4580;g7449;g5903;g15134;g6012;g4762;g2451;g7249;g3274;g15480;g11041;g4286
GO:0043436	oxoacid metabolic process	34	34	1	1	g15457;g1559;g3987;g10143;g4910;g4289;g5849;g918;g2888;g6095;g5806;g9820;g3076;g3988;g1994;g7225;g15911;g502;g4061;g10711;g15455;g8625;g4580;g7449;g5903;g15134;g6012;g4762;g2451;g7249;g3274;g15480;g11041;g4286
GO:0016070	RNA metabolic process	33	33	1	1	g15713;g8736;g4970;g1635;g6087;g5719;g4289;g7564;g16055;g6095;g4782;g11117;g3857;g9081;g16006;g759;g2488;g3788;g15889;g4061;g6138;g3822;g6125;g15714;g7453;g7282;g6281;g2324;g11041;g2194;g1333;g6254;g3076
GO:0005975	carbohydrate metabolic process	32	32	1	1	g5932;g7709;g4571;g13424;g9166;g8806;g8112;g760;g6334;g6286;g2737;g1768;g1715;g15835;g15207;g14381;g12204;g11142;g11016;g6254;g1160;g15452;g11330;g5886;g11568;g4623;g15829;g7594;g14291;g1685;g12130;g14321
GO:0019752	carboxylic acid metabolic process	32	32	1	1	g1559;g3987;g10143;g4910;g4289;g5849;g918;g2888;g6095;g5806;g9820;g3076;g3988;g1994;g7225;g502;g4061;g10711;g15455;g8625;g4580;g7449;g5903;g15134;g6012;g4762;g2451;g7249;g3274;g15480;g11041;g4286
GO:0060255	regulation of macromolecule metabolic process	32	32	1	1	g5803;g5719;g16122;g15889;g1635;g14315;g1057;g8930;g2663;g672;g7711;g475;g7590;g4057;g7873;g5932;g221;g16063;g16;g12225;g4833;g9010;g8545;g5312;g4421;g4319;g3788;g3128;g2219;g11986;g2488;g3697
GO:0031323	regulation of cellular metabolic process	31	31	1	1	g5719;g16122;g15889;g1635;g14315;g1057;g8930;g2663;g672;g475;g7590;g4057;g7873;g5932;g221;g16063;g16;g7711;g12225;g4833;g9010;g8545;g5312;g4421;g4319;g3788;g3128;g2219;g11986;g2488;g3697
GO:0080090	regulation of primary metabolic process	31	31	1	1	g5719;g16122;g15889;g1635;g14315;g1057;g8930;g2663;g672;g475;g7590;g4057;g7873;g5932;g221;g16063;g16;g7711;g12225;g4833;g9010;g8545;g5312;g4421;g4319;g3788;g3128;g2219;g11986;g2488;g3697
GO:0006996	organelle organization	30	30	1	1	g15457;g6087;g5719;g16122;g13214;g637;g672;g8536;g6095;g12037;g10820;g7564;g3445;g10811;g15889;g3337;g7282;g1048;g795;g5922;g15316;g2488;g4023;g6291;g13276;g13019;g4792;g12928;g12208;g11225
GO:0010468	regulation of gene expression	29	29	1	1	g5803;g1635;g5719;g14315;g15889;g1057;g8930;g7711;g475;g7873;g5932;g221;g16063;g16;g4057;g12225;g672;g4833;g9010;g8545;g5312;g4421;g4319;g3788;g3128;g2219;g11986;g2488;g3697
GO:0051171	regulation of nitrogen compound metabolic process	29	29	1	1	g5719;g16122;g15889;g1635;g14315;g1057;g8930;g672;g475;g7873;g5932;g221;g16063;g16;g7711;g4057;g12225;g4833;g9010;g8545;g5312;g4421;g4319;g3788;g3128;g2219;g11986;g2488;g3697
GO:0051716	cellular response to stimulus	29	29	1	1	g16101;g13276;g13019;g7757;g7095;g6222;g5535;g4857;g4328;g2929;g2215;g15737;g3374;g15457;g15889;g7134;g2852;g5674;g16006;g15421;g2080;g2682;g8648;g10823;g15891;g3810;g10820;g1774;g8930
GO:1901362	organic cyclic compound biosynthetic process	29	29	1	1	g2139;g3987;g1635;g6087;g5719;g7749;g504;g2509;g7564;g16055;g6012;g9081;g9820;g759;g2488;g3788;g10182;g502;g15889;g7432;g3810;g8896;g11145;g7249;g10143;g4821;g4286;g8806;g4762
GO:0009889	regulation of biosynthetic process	28	28	1	1	g1635;g5719;g14315;g15889;g1057;g8930;g475;g7873;g5932;g221;g16063;g16;g4057;g12225;g672;g4833;g9010;g8545;g5312;g4421;g4319;g3788;g3128;g2219;g11986;g2488;g3697;g16122
GO:0010556	regulation of macromolecule biosynthetic process	28	28	1	1	g1635;g5719;g14315;g15889;g1057;g8930;g475;g7873;g5932;g221;g16063;g16;g4057;g12225;g672;g4833;g9010;g8545;g5312;g4421;g4319;g3788;g3128;g2219;g11986;g2488;g3697;g16122
GO:0018130	heterocycle biosynthetic process	28	28	1	1	g2139;g3987;g1635;g6087;g5719;g7749;g504;g2509;g7564;g16055;g6012;g9081;g759;g2488;g3788;g4821;g10182;g502;g15889;g7432;g3810;g8896;g11145;g7249;g10143;g4286;g8806;g4762
GO:0031326	regulation of cellular biosynthetic process	28	28	1	1	g1635;g5719;g14315;g15889;g1057;g8930;g475;g7873;g5932;g221;g16063;g16;g4057;g12225;g672;g4833;g9010;g8545;g5312;g4421;g4319;g3788;g3128;g2219;g11986;g2488;g3697;g16122
GO:2000112	regulation of cellular macromolecule biosynthetic process	28	28	1	1	g1635;g5719;g14315;g15889;g1057;g8930;g475;g7873;g5932;g221;g16063;g16;g4057;g12225;g672;g4833;g9010;g8545;g5312;g4421;g4319;g3788;g3128;g2219;g11986;g2488;g3697;g16122
GO:0006520	cellular amino acid metabolic process	27	27	1	1	g1559;g3987;g10143;g918;g2888;g6095;g5806;g9820;g3076;g3988;g1994;g7225;g502;g4061;g8625;g4580;g7449;g5903;g15134;g6012;g4762;g2451;g7249;g3274;g15480;g11041;g4286
GO:0009056	catabolic process	27	27	1	1	g8896;g11042;g4289;g5849;g5674;g10143;g1598;g5806;g11330;g15457;g9209;g577;g3457;g10152;g5886;g11568;g12146;g15134;g14381;g7594;g7453;g14291;g4365;g3137;g2194;g4970;g1333
GO:0019219	regulation of nucleobase-containing compound metabolic process	26	26	1	1	g5719;g16122;g15889;g1635;g14315;g1057;g8930;g672;g7873;g5932;g221;g16063;g16;g7711;g4833;g9010;g8545;g5312;g4421;g4319;g3788;g3128;g2219;g11986;g2488;g3697
GO:0019438	aromatic compound biosynthetic process	26	26	1	1	g2139;g3987;g1635;g6087;g5719;g7749;g504;g2509;g7564;g16055;g6012;g9081;g9820;g759;g2488;g3788;g10182;g502;g15889;g7432;g3810;g8896;g11145;g10143;g4286;g8806
GO:1901575	organic substance catabolic process	26	26	1	1	g8896;g11042;g4289;g5849;g5674;g10143;g1598;g5806;g11330;g9209;g577;g3457;g10152;g5886;g11568;g12146;g15134;g14381;g7594;g7453;g14291;g4365;g3137;g2194;g4970;g1333
GO:0051252	regulation of RNA metabolic process	25	25	1	1	g1635;g5719;g14315;g15889;g1057;g8930;g7873;g5932;g221;g16063;g16;g7711;g672;g4833;g9010;g8545;g5312;g4421;g4319;g3788;g3128;g2219;g11986;g2488;g3697
GO:0006259	DNA metabolic process	24	24	1	1	g16161;g7729;g7569;g746;g433;g323;g13276;g10737;g672;g5719;g16122;g3374;g15889;g11554;g7432;g5393;g3810;g3693;g10820;g15421;g2682;g15891;g7908;g1377
GO:0006355	regulation of transcription, DNA-templated	24	24	1	1	g1635;g5719;g14315;g15889;g1057;g8930;g7873;g5932;g221;g16063;g16;g672;g4833;g9010;g8545;g5312;g4421;g4319;g3788;g3128;g2219;g11986;g2488;g3697
GO:0051641	cellular localization	24	24	1	1	g6710;g3250;g3247;g7665;g6814;g4537;g15457;g5997;g12425;g7564;g12208;g5719;g15306;g15714;g8930;g9797;g2595;g8610;g795;g15889;g7746;g3137;g7282;g15925
GO:1903506	regulation of nucleic acid-templated transcription	24	24	1	1	g1635;g5719;g14315;g15889;g1057;g8930;g7873;g5932;g221;g16063;g16;g672;g4833;g9010;g8545;g5312;g4421;g4319;g3788;g3128;g2219;g11986;g2488;g3697
GO:2001141	regulation of RNA biosynthetic process	24	24	1	1	g1635;g5719;g14315;g15889;g1057;g8930;g7873;g5932;g221;g16063;g16;g672;g4833;g9010;g8545;g5312;g4421;g4319;g3788;g3128;g2219;g11986;g2488;g3697
GO:0043933	macromolecular complex subunit organization	23	23	1	1	g6087;g5719;g16122;g637;g8536;g12037;g3788;g15889;g6138;g4773;g3822;g6125;g7282;g672;g5922;g15316;g2488;g4792;g12928;g11225;g12573;g4832;g5674
GO:0051649	establishment of localization in cell	23	23	1	1	g6710;g3250;g3247;g7665;g6814;g4537;g15457;g5997;g12425;g7564;g12208;g5719;g15306;g15714;g9797;g2595;g8610;g795;g15889;g7746;g3137;g7282;g15925
GO:0034654	nucleobase-containing compound biosynthetic process	22	22	1	1	g2139;g1635;g6087;g5719;g7749;g7564;g16055;g6012;g9081;g759;g2488;g3788;g10182;g15889;g7432;g3810;g8896;g504;g2509;g11145;g10143;g8806
GO:0044248	cellular catabolic process	21	21	1	1	g8896;g11042;g4289;g5849;g5674;g10143;g1598;g5806;g11330;g9209;g577;g3457;g10152;g15134;g7594;g7453;g14291;g3137;g2194;g4970;g1333
GO:0006508	proteolysis	20	20	1	1	g11042;g5674;g1347;g9209;g577;g3457;g10152;g3137;g4643;g6599;g6579;g3945;g3115;g2697;g15737;g1539;g13874;g13864;g12146;g11549
GO:0019637	organophosphate metabolic process	19	19	1	1	g2139;g7749;g6012;g1110;g4821;g15829;g8896;g6334;g2737;g4211;g16101;g14381;g504;g2509;g11145;g7416;g10143;g5678;g2971
GO:0071702	organic substance transport	19	19	1	1	g6710;g7665;g6814;g9672;g12425;g3660;g12208;g15714;g6164;g5237;g8610;g2737;g13911;g13320;g10417;g795;g8942;g15889;g3137
GO:0006412	translation	18	18	1	1	g4832;g6095;g904;g12225;g4061;g8771;g7300;g5417;g2983;g16140;g7633;g9081;g759;g7518;g3788;g2556;g11041;g12573
GO:0006518	peptide metabolic process	18	18	1	1	g4832;g6095;g904;g12225;g4061;g8771;g7300;g5417;g2983;g16140;g7633;g9081;g759;g7518;g3788;g2556;g11041;g12573
GO:0043043	peptide biosynthetic process	18	18	1	1	g4832;g6095;g904;g12225;g4061;g8771;g7300;g5417;g2983;g16140;g7633;g9081;g759;g7518;g3788;g2556;g11041;g12573
GO:0043603	cellular amide metabolic process	18	18	1	1	g4832;g6095;g904;g12225;g4061;g8771;g7300;g5417;g2983;g16140;g7633;g9081;g759;g7518;g3788;g2556;g11041;g12573
GO:0043604	amide biosynthetic process	18	18	1	1	g4832;g6095;g904;g12225;g4061;g8771;g7300;g5417;g2983;g16140;g7633;g9081;g759;g7518;g3788;g2556;g11041;g12573
GO:0044085	cellular component biogenesis	18	18	1	1	g16047;g6376;g6593;g6138;g3822;g6125;g7282;g6281;g1160;g1635;g2324;g4792;g12928;g3788;g15925;g12573;g4832;g5674
GO:0046907	intracellular transport	18	18	1	1	g6710;g7665;g6814;g4537;g15457;g5997;g12425;g12208;g15306;g15714;g9797;g2595;g8610;g795;g15889;g3137;g7282;g15925
GO:1901135	carbohydrate derivative metabolic process	18	18	1	1	g2139;g8896;g1160;g6012;g1110;g504;g11145;g10348;g15829;g4435;g6334;g2737;g4211;g14381;g2509;g8806;g2971;g8631
GO:1901605	alpha-amino acid metabolic process	18	18	1	1	g1559;g3987;g10143;g5806;g3988;g7225;g1994;g502;g8625;g4580;g15134;g6012;g4762;g2451;g7249;g3274;g15480;g4286
GO:0006468	protein phosphorylation	17	17	1	1	g15889;g5803;g5755;g12258;g9743;g8930;g7711;g7134;g4311;g3128;g2610;g2229;g1571;g1467;g12412;g10901;g12080
GO:0007154	cell communication	17	17	1	1	g16101;g7757;g7095;g6222;g5535;g4857;g4328;g2929;g2215;g15737;g15457;g7134;g2852;g2080;g8648;g10823;g1774
GO:0007165	signal transduction	17	17	1	1	g16101;g7757;g7095;g6222;g5535;g4857;g4328;g2929;g2215;g15737;g15457;g7134;g2852;g2080;g8648;g10823;g1774
GO:0009057	macromolecule catabolic process	17	17	1	1	g11042;g4289;g5674;g11330;g9209;g577;g3457;g10152;g5886;g11568;g12146;g7594;g7453;g3137;g2194;g4970;g1333
GO:0023052	signaling	17	17	1	1	g16101;g7757;g7095;g6222;g5535;g4857;g4328;g2929;g2215;g15737;g15457;g7134;g2852;g2080;g8648;g10823;g1774
GO:0044700	single organism signaling	17	17	1	1	g16101;g7757;g7095;g6222;g5535;g4857;g4328;g2929;g2215;g15737;g15457;g7134;g2852;g2080;g8648;g10823;g1774
GO:0006396	RNA processing	16	16	1	1	g8736;g4970;g4782;g11117;g3857;g16006;g6138;g3822;g6125;g15714;g7282;g6281;g1635;g2324;g6254;g3076
GO:0006811	ion transport	16	16	1	1	g15911;g6962;g10983;g1553;g12208;g11825;g9672;g12425;g6522;g12434;g1203;g3866;g4153;g11986;g7359;g9915
GO:0044283	small molecule biosynthetic process	16	16	1	1	g5932;g1559;g9820;g3076;g3988;g7225;g502;g10711;g15455;g8625;g4580;g7449;g5903;g7249;g4286;g10143
GO:0051276	chromosome organization	16	16	1	1	g6087;g5719;g16122;g13214;g8536;g12037;g10820;g10811;g15889;g672;g5922;g15316;g2488;g6291;g13276;g13019
GO:0016053	organic acid biosynthetic process	15	15	1	1	g1559;g9820;g3076;g3988;g7225;g502;g10711;g15455;g8625;g4580;g7449;g5903;g7249;g4286;g10143
GO:0046394	carboxylic acid biosynthetic process	15	15	1	1	g1559;g9820;g3076;g3988;g7225;g502;g10711;g15455;g8625;g4580;g7449;g5903;g7249;g4286;g10143
GO:1902582	single-organism intracellular transport	15	15	1	1	g6710;g4537;g15457;g12425;g7665;g12208;g15714;g9797;g2595;g8610;g795;g15889;g3137;g7282;g15925
GO:1902589	single-organism organelle organization	15	15	1	1	g15457;g6087;g5719;g16122;g13214;g637;g672;g8536;g6095;g12037;g10820;g7564;g3337;g1048;g11225
GO:0033036	macromolecule localization	14	14	1	1	g6710;g7665;g6814;g12208;g15714;g8930;g2737;g13911;g13320;g10417;g795;g8942;g15889;g3137
GO:0055086	nucleobase-containing small molecule metabolic process	14	14	1	1	g2139;g8896;g7749;g504;g2509;g6012;g1110;g11145;g10348;g6334;g2737;g7873;g10143;g4762
GO:0006629	lipid metabolic process	13	13	1	1	g1768;g11142;g7757;g3911;g7614;g10711;g15455;g4211;g16101;g4365;g7416;g5678;g2971
GO:0044723	single-organism carbohydrate metabolic process	13	13	1	1	g5932;g6254;g1768;g11142;g1160;g15452;g4623;g15829;g7594;g14291;g1685;g12130;g14321
GO:0090407	organophosphate biosynthetic process	13	13	1	1	g2139;g7749;g6012;g4821;g8896;g4211;g16101;g504;g2509;g11145;g10143;g5678;g2971
GO:0006950	response to stress	12	12	1	1	g13276;g13019;g3374;g15889;g15591;g5674;g16006;g15421;g2682;g15891;g3810;g10820
GO:0008652	cellular amino acid biosynthetic process	12	12	1	1	g1559;g9820;g3076;g3988;g7225;g502;g8625;g4580;g7449;g5903;g7249;g4286
GO:0016192	vesicle-mediated transport	12	12	1	1	g3250;g3247;g4773;g9797;g2595;g5681;g918;g7746;g637;g316;g2477;g12208
GO:0022613	ribonucleoprotein complex biogenesis	12	12	1	1	g6376;g6593;g6138;g3822;g6125;g7282;g6281;g1635;g2324;g15925;g12573;g4832
GO:0044265	cellular macromolecule catabolic process	12	12	1	1	g11042;g4289;g5674;g9209;g577;g3457;g10152;g7453;g3137;g2194;g4970;g1333
GO:0065009	regulation of molecular function	12	12	1	1	g2663;g672;g9797;g11221;g7590;g4057;g4857;g4328;g2929;g15737;g3788;g795
GO:0006357	regulation of transcription from RNA polymerase II promoter	11	11	1	1	g15889;g1057;g1635;g8930;g7873;g5932;g5719;g221;g16063;g16;g3697
GO:0006753	nucleoside phosphate metabolic process	11	11	1	1	g2139;g7749;g6012;g1110;g8896;g6334;g2737;g504;g2509;g11145;g10143
GO:0008104	protein localization	11	11	1	1	g6710;g7665;g6814;g12208;g8930;g2737;g13911;g13320;g10417;g795;g3137
GO:0009117	nucleotide metabolic process	11	11	1	1	g2139;g7749;g6012;g1110;g8896;g6334;g2737;g504;g2509;g11145;g10143
GO:0022607	cellular component assembly	11	11	1	1	g16047;g6138;g3822;g6125;g7282;g4792;g12928;g3788;g12573;g4832;g5674
GO:0032259	methylation	11	11	1	1	g8536;g12037;g3710;g8736;g821;g7264;g3498;g6281;g2353;g8010;g6247
GO:0033554	cellular response to stress	11	11	1	1	g13276;g13019;g3374;g15889;g5674;g16006;g15421;g2682;g15891;g3810;g10820
GO:0034660	ncRNA metabolic process	11	11	1	1	g1635;g6095;g3857;g16006;g4061;g15714;g7282;g6281;g6125;g2324;g11041
GO:0044255	cellular lipid metabolic process	11	11	1	1	g1768;g11142;g7614;g10711;g15455;g4211;g16101;g4365;g7416;g5678;g2971
GO:0050790	regulation of catalytic activity	11	11	1	1	g2663;g672;g9797;g11221;g7590;g4057;g4857;g4328;g2929;g15737;g795
GO:0006351	transcription, DNA-templated	10	10	1	1	g1635;g6087;g5719;g7564;g16055;g9081;g759;g2488;g3788;g15889
GO:0006812	cation transport	10	10	1	1	g1553;g15911;g12208;g6522;g12434;g1203;g3866;g4153;g11986;g9915
GO:0015031	protein transport	10	10	1	1	g6710;g7665;g6814;g12208;g2737;g13911;g13320;g10417;g795;g3137
GO:0016482	cytoplasmic transport	10	10	1	1	g6710;g12208;g15306;g15714;g8610;g795;g15889;g3137;g7282;g15925
GO:0032774	RNA biosynthetic process	10	10	1	1	g1635;g6087;g5719;g7564;g16055;g9081;g759;g2488;g3788;g15889
GO:0034622	cellular macromolecular complex assembly	10	10	1	1	g6138;g3822;g6125;g7282;g4792;g12928;g3788;g12573;g4832;g5674
GO:0044712	single-organism catabolic process	10	10	1	1	g8896;g5849;g10143;g1598;g5806;g15457;g15134;g7594;g14291;g4365
GO:0045184	establishment of protein localization	10	10	1	1	g6710;g7665;g6814;g12208;g2737;g13911;g13320;g10417;g795;g3137
GO:0048518	positive regulation of biological process	10	10	1	1	g637;g1057;g2663;g672;g9797;g11221;g475;g2080;g12225;g4057
GO:0065003	macromolecular complex assembly	10	10	1	1	g6138;g3822;g6125;g7282;g4792;g12928;g3788;g12573;g4832;g5674
GO:0097659	nucleic acid-templated transcription	10	10	1	1	g1635;g6087;g5719;g7564;g16055;g9081;g759;g2488;g3788;g15889
GO:0006325	chromatin organization	9	9	1	1	g6087;g5719;g16122;g8536;g12037;g672;g5922;g15316;g2488
GO:0006413	translational initiation	9	9	1	1	g4832;g904;g9081;g759;g7518;g3788;g2556;g12225;g12573
GO:0006974	cellular response to DNA damage stimulus	9	9	1	1	g13276;g13019;g3374;g15889;g15421;g2682;g15891;g3810;g10820
GO:0016071	mRNA metabolic process	9	9	1	1	g4289;g4782;g11117;g6138;g3822;g6125;g7453;g6254;g3076
GO:0048519	negative regulation of biological process	9	9	1	1	g8930;g5803;g1635;g5719;g14315;g672;g1572;g2488;g16122
GO:0065008	regulation of biological quality	9	9	1	1	g11986;g637;g3445;g9478;g10820;g12208;g2399;g672;g1572
GO:1901137	carbohydrate derivative biosynthetic process	9	9	1	1	g2139;g1160;g6012;g4435;g4211;g504;g2509;g8806;g2971
GO:0007049	cell cycle	8	8	1	1	g5719;g16122;g13214;g672;g11042;g7564;g3697;g11225
GO:0008610	lipid biosynthetic process	8	8	1	1	g7614;g10711;g15455;g4211;g16101;g7416;g5678;g2971
GO:0009064	glutamine family amino acid metabolic process	8	8	1	1	g1559;g3987;g3988;g8625;g6012;g4762;g2451;g7249
GO:0009165	nucleotide biosynthetic process	8	8	1	1	g2139;g7749;g6012;g8896;g504;g2509;g11145;g10143
GO:0009893	positive regulation of metabolic process	8	8	1	1	g1057;g2663;g672;g9797;g11221;g475;g12225;g4057
GO:0018193	peptidyl-amino acid modification	8	8	1	1	g8536;g12037;g16006;g2152;g15513;g10256;g821;g12080
GO:0019439	aromatic compound catabolic process	8	8	1	1	g8896;g4289;g10143;g15134;g7453;g2194;g4970;g1333
GO:0022402	cell cycle process	8	8	1	1	g5719;g16122;g13214;g672;g11042;g7564;g3697;g11225
GO:0030163	protein catabolic process	8	8	1	1	g11042;g5674;g9209;g577;g3457;g10152;g12146;g3137
GO:0034220	ion transmembrane transport	8	8	1	1	g15911;g12208;g6962;g6522;g4153;g11986;g7359;g9915
GO:0034470	ncRNA processing	8	8	1	1	g3857;g16006;g15714;g7282;g6281;g6125;g1635;g2324
GO:0042221	response to chemical	8	8	1	1	g9478;g15156;g6410;g5674;g16006;g4365;g11098;g8930
GO:0043632	modification-dependent macromolecule catabolic process	8	8	1	1	g11042;g4289;g5674;g9209;g577;g3457;g10152;g3137
GO:0044262	cellular carbohydrate metabolic process	8	8	1	1	g6254;g11330;g4623;g15829;g7594;g14291;g12130;g14321
GO:0044270	cellular nitrogen compound catabolic process	8	8	1	1	g8896;g4289;g10143;g15134;g7453;g2194;g4970;g1333
GO:0046700	heterocycle catabolic process	8	8	1	1	g8896;g4289;g10143;g15134;g7453;g2194;g4970;g1333
GO:0048522	positive regulation of cellular process	8	8	1	1	g637;g1057;g2663;g672;g475;g2080;g12225;g4057
GO:0048523	negative regulation of cellular process	8	8	1	1	g8930;g1635;g5719;g14315;g672;g1572;g2488;g16122
GO:0051336	regulation of hydrolase activity	8	8	1	1	g2663;g672;g9797;g11221;g4857;g4328;g2929;g15737
GO:1901293	nucleoside phosphate biosynthetic process	8	8	1	1	g2139;g7749;g6012;g8896;g504;g2509;g11145;g10143
GO:1901361	organic cyclic compound catabolic process	8	8	1	1	g8896;g4289;g10143;g15134;g7453;g2194;g4970;g1333
GO:1901607	alpha-amino acid biosynthetic process	8	8	1	1	g1559;g3988;g7225;g502;g8625;g4580;g7249;g4286
GO:0000278	mitotic cell cycle	7	7	1	1	g5719;g16122;g13214;g11042;g7564;g3697;g11225
GO:0006260	DNA replication	7	7	1	1	g5719;g16122;g11554;g7432;g5393;g3810;g3693
GO:0006281	DNA repair	7	7	1	1	g3374;g15889;g15421;g2682;g15891;g3810;g10820
GO:0006366	transcription from RNA polymerase II promoter	7	7	1	1	g6087;g5719;g9081;g759;g2488;g3788;g15889
GO:0006397	mRNA processing	7	7	1	1	g4782;g11117;g6138;g3822;g6125;g6254;g3076
GO:0006820	anion transport	7	7	1	1	g15911;g6962;g10983;g11825;g9672;g12425;g7359
GO:0009892	negative regulation of metabolic process	7	7	1	1	g5803;g1635;g5719;g14315;g8930;g672;g2488
GO:0010605	negative regulation of macromolecule metabolic process	7	7	1	1	g5803;g1635;g5719;g14315;g8930;g672;g2488
GO:0010629	negative regulation of gene expression	7	7	1	1	g5803;g1635;g5719;g14315;g8930;g672;g2488
GO:0016311	dephosphorylation	7	7	1	1	g2764;g2983;g10152;g15282;g15549;g470;g16122
GO:0016568	chromatin modification	7	7	1	1	g6087;g16122;g8536;g12037;g5922;g15316;g672
GO:0019941	modification-dependent protein catabolic process	7	7	1	1	g11042;g5674;g9209;g577;g3457;g10152;g3137
GO:0034613	cellular protein localization	7	7	1	1	g6710;g7665;g6814;g12208;g8930;g795;g3137
GO:0042254	ribosome biogenesis	7	7	1	1	g6376;g6593;g7282;g6281;g1635;g2324;g15925
GO:0042592	homeostatic process	7	7	1	1	g11986;g3445;g9478;g10820;g12208;g2399;g672
GO:0044257	cellular protein catabolic process	7	7	1	1	g11042;g5674;g9209;g577;g3457;g10152;g3137
GO:0051603	proteolysis involved in cellular protein catabolic process	7	7	1	1	g11042;g5674;g9209;g577;g3457;g10152;g3137
GO:0070647	protein modification by small protein conjugation or removal	7	7	1	1	g1347;g16006;g7307;g5633;g3457;g11042;g9209
GO:0070727	cellular macromolecule localization	7	7	1	1	g6710;g7665;g6814;g12208;g8930;g795;g3137
GO:1902580	single-organism cellular localization	7	7	1	1	g6710;g7564;g12208;g795;g3137;g7282;g15925
GO:1903047	mitotic cell cycle process	7	7	1	1	g5719;g16122;g13214;g11042;g7564;g3697;g11225
GO:0006399	tRNA metabolic process	6	6	1	1	g6095;g3857;g16006;g4061;g15714;g11041
GO:0006511	ubiquitin-dependent protein catabolic process	6	6	1	1	g11042;g9209;g577;g3457;g10152;g3137
GO:0006732	coenzyme metabolic process	6	6	1	1	g7749;g4821;g8896;g6334;g2737;g10143
GO:0006886	intracellular protein transport	6	6	1	1	g6710;g7665;g6814;g12208;g795;g3137
GO:0006913	nucleocytoplasmic transport	6	6	1	1	g6710;g15306;g15714;g15889;g7282;g15925
GO:0007010	cytoskeleton organization	6	6	1	1	g637;g7564;g3337;g1048;g4023;g11225
GO:0009116	nucleoside metabolic process	6	6	1	1	g8896;g6012;g1110;g504;g11145;g10348
GO:0009890	negative regulation of biosynthetic process	6	6	1	1	g1635;g5719;g14315;g8930;g672;g2488
GO:0010558	negative regulation of macromolecule biosynthetic process	6	6	1	1	g1635;g5719;g14315;g8930;g672;g2488
GO:0019693	ribose phosphate metabolic process	6	6	1	1	g6012;g1110;g6334;g2737;g504;g2509
GO:0022618	ribonucleoprotein complex assembly	6	6	1	1	g6138;g3822;g6125;g7282;g12573;g4832
GO:0031324	negative regulation of cellular metabolic process	6	6	1	1	g1635;g5719;g14315;g8930;g672;g2488
GO:0031325	positive regulation of cellular metabolic process	6	6	1	1	g1057;g2663;g672;g475;g12225;g4057
GO:0031327	negative regulation of cellular biosynthetic process	6	6	1	1	g1635;g5719;g14315;g8930;g672;g2488
GO:0034655	nucleobase-containing compound catabolic process	6	6	1	1	g8896;g4289;g7453;g2194;g4970;g1333
GO:0043087	regulation of GTPase activity	6	6	1	1	g9797;g11221;g4857;g4328;g2929;g15737
GO:0043414	macromolecule methylation	6	6	1	1	g8536;g12037;g6281;g2353;g8010;g6247
GO:0044093	positive regulation of molecular function	6	6	1	1	g2663;g672;g9797;g11221;g4057;g3788
GO:0044282	small molecule catabolic process	6	6	1	1	g5849;g10143;g1598;g5806;g15134;g14291
GO:0045892	negative regulation of transcription, DNA-templated	6	6	1	1	g1635;g5719;g14315;g8930;g672;g2488
GO:0045934	negative regulation of nucleobase-containing compound metabolic process	6	6	1	1	g1635;g5719;g14315;g8930;g672;g2488
GO:0051169	nuclear transport	6	6	1	1	g6710;g15306;g15714;g15889;g7282;g15925
GO:0051172	negative regulation of nitrogen compound metabolic process	6	6	1	1	g1635;g5719;g14315;g8930;g672;g2488
GO:0051186	cofactor metabolic process	6	6	1	1	g7749;g4821;g8896;g6334;g2737;g10143
GO:0051253	negative regulation of RNA metabolic process	6	6	1	1	g1635;g5719;g14315;g8930;g672;g2488
GO:0051640	organelle localization	6	6	1	1	g7564;g5719;g7282;g3250;g3247;g15925
GO:0051656	establishment of organelle localization	6	6	1	1	g7564;g5719;g7282;g3250;g3247;g15925
GO:0071103	DNA conformation change	6	6	1	1	g5719;g16122;g13214;g10811;g15889;g672
GO:0071822	protein complex subunit organization	6	6	1	1	g637;g4773;g4792;g12928;g11225;g5674
GO:0071826	ribonucleoprotein complex subunit organization	6	6	1	1	g6138;g3822;g6125;g7282;g12573;g4832
GO:0090305	nucleic acid phosphodiester bond hydrolysis	6	6	1	1	g5803;g7932;g4970;g15421;g15889;g4289
GO:0098655	cation transmembrane transport	6	6	1	1	g15911;g12208;g6522;g4153;g11986;g9915
GO:0098660	inorganic ion transmembrane transport	6	6	1	1	g15911;g12208;g4153;g11986;g7359;g9915
GO:1901657	glycosyl compound metabolic process	6	6	1	1	g8896;g6012;g1110;g504;g11145;g10348
GO:1902679	negative regulation of RNA biosynthetic process	6	6	1	1	g1635;g5719;g14315;g8930;g672;g2488
GO:1903507	negative regulation of nucleic acid-templated transcription	6	6	1	1	g1635;g5719;g14315;g8930;g672;g2488
GO:2000113	negative regulation of cellular macromolecule biosynthetic process	6	6	1	1	g1635;g5719;g14315;g8930;g672;g2488
GO:0000375	RNA splicing, via transesterification reactions	5	5	1	1	g4782;g11117;g6138;g3822;g6125
GO:0000377	RNA splicing, via transesterification reactions with bulged adenosine as nucleophile	5	5	1	1	g4782;g11117;g6138;g3822;g6125
GO:0000398	mRNA splicing, via spliceosome	5	5	1	1	g4782;g11117;g6138;g3822;g6125
GO:0005976	polysaccharide metabolic process	5	5	1	1	g11330;g5886;g11568;g4623;g7594
GO:0006091	generation of precursor metabolites and energy	5	5	1	1	g4910;g4289;g1110;g4623;g7594
GO:0006401	RNA catabolic process	5	5	1	1	g4289;g7453;g2194;g4970;g1333
GO:0006470	protein dephosphorylation	5	5	1	1	g2764;g2983;g10152;g470;g16122
GO:0006479	protein methylation	5	5	1	1	g8536;g12037;g2353;g8010;g6247
GO:0006644	phospholipid metabolic process	5	5	1	1	g4211;g16101;g7416;g5678;g2971
GO:0006733	oxidoreduction coenzyme metabolic process	5	5	1	1	g7749;g8896;g6334;g2737;g10143
GO:0008213	protein alkylation	5	5	1	1	g8536;g12037;g2353;g8010;g6247
GO:0008380	RNA splicing	5	5	1	1	g4782;g11117;g6138;g3822;g6125
GO:0009072	aromatic amino acid family metabolic process	5	5	1	1	g10143;g9820;g1994;g502;g15134
GO:0010604	positive regulation of macromolecule metabolic process	5	5	1	1	g1057;g2663;g672;g475;g12225
GO:0015698	inorganic anion transport	5	5	1	1	g15911;g6962;g10983;g11825;g7359
GO:0015980	energy derivation by oxidation of organic compounds	5	5	1	1	g4910;g4289;g1110;g4623;g7594
GO:0016052	carbohydrate catabolic process	5	5	1	1	g11330;g5886;g11568;g7594;g14291
GO:0019362	pyridine nucleotide metabolic process	5	5	1	1	g7749;g8896;g6334;g2737;g10143
GO:0030001	metal ion transport	5	5	1	1	g1553;g15911;g3866;g4153;g11986
GO:0032268	regulation of cellular protein metabolic process	5	5	1	1	g2663;g475;g7590;g4057;g12225
GO:0032446	protein modification by small protein conjugation	5	5	1	1	g16006;g7307;g5633;g3457;g11042
GO:0043085	positive regulation of catalytic activity	5	5	1	1	g2663;g672;g9797;g11221;g4057
GO:0046496	nicotinamide nucleotide metabolic process	5	5	1	1	g7749;g8896;g6334;g2737;g10143
GO:0051128	regulation of cellular component organization	5	5	1	1	g637;g1635;g12225;g16006;g1572
GO:0051246	regulation of protein metabolic process	5	5	1	1	g2663;g475;g7590;g4057;g12225
GO:0071705	nitrogen compound transport	5	5	1	1	g9672;g3660;g15714;g8610;g15889
GO:0072521	purine-containing compound metabolic process	5	5	1	1	g8896;g504;g2509;g1110;g7873
GO:0072524	pyridine-containing compound metabolic process	5	5	1	1	g7749;g8896;g6334;g2737;g10143
GO:0098662	inorganic cation transmembrane transport	5	5	1	1	g15911;g12208;g4153;g11986;g9915
GO:0000272	polysaccharide catabolic process	4	4	1	1	g11330;g5886;g11568;g7594
GO:0000280	nuclear division	4	4	1	1	g5719;g16122;g13214;g672
GO:0006338	chromatin remodeling	4	4	1	1	g16122;g5922;g15316;g672
GO:0006364	rRNA processing	4	4	1	1	g7282;g6281;g1635;g2324
GO:0006457	protein folding	4	4	1	1	g2152;g15536;g15513;g795
GO:0006605	protein targeting	4	4	1	1	g6710;g12208;g795;g3137
GO:0006897	endocytosis	4	4	1	1	g637;g316;g2477;g12208
GO:0007005	mitochondrion organization	4	4	1	1	g6095;g795;g4792;g12928
GO:0007017	microtubule-based process	4	4	1	1	g7564;g3337;g4023;g11225
GO:0007034	vacuolar transport	4	4	1	1	g4537;g15457;g12208;g3137
GO:0008654	phospholipid biosynthetic process	4	4	1	1	g4211;g16101;g5678;g2971
GO:0009084	glutamine family amino acid biosynthetic process	4	4	1	1	g1559;g3988;g8625;g7249
GO:0009112	nucleobase metabolic process	4	4	1	1	g504;g2509;g7873;g4762
GO:0009123	nucleoside monophosphate metabolic process	4	4	1	1	g1110;g504;g2509;g11145
GO:0009161	ribonucleoside monophosphate metabolic process	4	4	1	1	g1110;g504;g2509;g11145
GO:0009259	ribonucleotide metabolic process	4	4	1	1	g6012;g1110;g504;g2509
GO:0009451	RNA modification	4	4	1	1	g15713;g3857;g16006;g6281
GO:0015672	monovalent inorganic cation transport	4	4	1	1	g12208;g4153;g11986;g9915
GO:0015931	nucleobase-containing compound transport	4	4	1	1	g3660;g15714;g8610;g15889
GO:0016054	organic acid catabolic process	4	4	1	1	g5849;g10143;g5806;g15134
GO:0016072	rRNA metabolic process	4	4	1	1	g7282;g6281;g1635;g2324
GO:0016458	gene silencing	4	4	1	1	g5803;g5719;g672;g2488
GO:0016567	protein ubiquitination	4	4	1	1	g7307;g5633;g3457;g11042
GO:0032787	monocarboxylic acid metabolic process	4	4	1	1	g10143;g5849;g10711;g15455
GO:0033365	protein localization to organelle	4	4	1	1	g6710;g12208;g795;g3137
GO:0035556	intracellular signal transduction	4	4	1	1	g16101;g7134;g2852;g2080
GO:0046395	carboxylic acid catabolic process	4	4	1	1	g5849;g10143;g5806;g15134
GO:0046486	glycerolipid metabolic process	4	4	1	1	g16101;g4365;g5678;g2971
GO:0048285	organelle fission	4	4	1	1	g5719;g16122;g13214;g672
GO:0048878	chemical homeostasis	4	4	1	1	g11986;g3445;g12208;g2399
GO:0051052	regulation of DNA metabolic process	4	4	1	1	g5719;g16122;g15889;g672
GO:0051168	nuclear export	4	4	1	1	g15714;g15889;g7282;g15925
GO:0051173	positive regulation of nitrogen compound metabolic process	4	4	1	1	g1057;g672;g475;g12225
GO:0051188	cofactor biosynthetic process	4	4	1	1	g7749;g8896;g4821;g10143
GO:0051301	cell division	4	4	1	1	g7564;g3697;g3115;g16006
GO:0051345	positive regulation of hydrolase activity	4	4	1	1	g2663;g672;g9797;g11221
GO:0070085	glycosylation	4	4	1	1	g1768;g11142;g1160;g15452
GO:0071166	ribonucleoprotein complex localization	4	4	1	1	g15714;g15889;g7282;g15925
GO:0071426	ribonucleoprotein complex export from nucleus	4	4	1	1	g15714;g15889;g7282;g15925
GO:0072594	establishment of protein localization to organelle	4	4	1	1	g6710;g12208;g795;g3137
GO:1901565	organonitrogen compound catabolic process	4	4	1	1	g8896;g10143;g5806;g15134
GO:0000003	reproduction	3	3	1	1	g672;g16006;g16122
GO:0000018	regulation of DNA recombination	3	3	1	1	g5719;g16122;g15889
GO:0000019	regulation of mitotic recombination	3	3	1	1	g5719;g16122;g15889
GO:0000070	mitotic sister chromatid segregation	3	3	1	1	g5719;g16122;g13214
GO:0000096	sulfur amino acid metabolic process	3	3	1	1	g7225;g7449;g5903
GO:0000097	sulfur amino acid biosynthetic process	3	3	1	1	g7225;g7449;g5903
GO:0000226	microtubule cytoskeleton organization	3	3	1	1	g7564;g3337;g11225
GO:0000413	protein peptidyl-prolyl isomerization	3	3	1	1	g2152;g15513;g10256
GO:0000819	sister chromatid segregation	3	3	1	1	g5719;g16122;g13214
GO:0002181	cytoplasmic translation	3	3	1	1	g4832;g904;g12573
GO:0002183	cytoplasmic translational initiation	3	3	1	1	g4832;g904;g12573
GO:0005996	monosaccharide metabolic process	3	3	1	1	g5932;g15829;g1685
GO:0006073	cellular glucan metabolic process	3	3	1	1	g11330;g4623;g7594
GO:0006081	cellular aldehyde metabolic process	3	3	1	1	g6334;g2737;g5810
GO:0006144	purine nucleobase metabolic process	3	3	1	1	g504;g2509;g7873
GO:0006163	purine nucleotide metabolic process	3	3	1	1	g1110;g504;g2509
GO:0006289	nucleotide-excision repair	3	3	1	1	g15889;g15421;g2682
GO:0006323	DNA packaging	3	3	1	1	g5719;g16122;g13214
GO:0006342	chromatin silencing	3	3	1	1	g5719;g672;g2488
GO:0006352	DNA-templated transcription, initiation	3	3	1	1	g9081;g3788;g15889
GO:0006367	transcription initiation from RNA polymerase II promoter	3	3	1	1	g9081;g3788;g15889
GO:0006417	regulation of translation	3	3	1	1	g475;g4057;g12225
GO:0006418	tRNA aminoacylation for protein translation	3	3	1	1	g6095;g4061;g11041
GO:0006461	protein complex assembly	3	3	1	1	g4792;g12928;g5674
GO:0006525	arginine metabolic process	3	3	1	1	g3987;g3988;g8625
GO:0006541	glutamine metabolic process	3	3	1	1	g6012;g4762;g2451
GO:0006568	tryptophan metabolic process	3	3	1	1	g10143;g502;g15134
GO:0006576	cellular biogenic amine metabolic process	3	3	1	1	g10143;g502;g15134
GO:0006586	indolalkylamine metabolic process	3	3	1	1	g10143;g502;g15134
GO:0006643	membrane lipid metabolic process	3	3	1	1	g4211;g7416;g2971
GO:0006650	glycerophospholipid metabolic process	3	3	1	1	g16101;g5678;g2971
GO:0006790	sulfur compound metabolic process	3	3	1	1	g7225;g7449;g5903
GO:0006818	hydrogen transport	3	3	1	1	g12208;g9915;g11986
GO:0006887	exocytosis	3	3	1	1	g3250;g3247;g7746
GO:0006979	response to oxidative stress	3	3	1	1	g15591;g5674;g16006
GO:0007059	chromosome segregation	3	3	1	1	g5719;g16122;g13214
GO:0007067	mitotic nuclear division	3	3	1	1	g5719;g16122;g13214
GO:0007076	mitotic chromosome condensation	3	3	1	1	g5719;g16122;g13214
GO:0008033	tRNA processing	3	3	1	1	g3857;g16006;g15714
GO:0009063	cellular amino acid catabolic process	3	3	1	1	g10143;g5806;g15134
GO:0009108	coenzyme biosynthetic process	3	3	1	1	g7749;g8896;g10143
GO:0009119	ribonucleoside metabolic process	3	3	1	1	g8896;g6012;g1110
GO:0009124	nucleoside monophosphate biosynthetic process	3	3	1	1	g504;g2509;g11145
GO:0009126	purine nucleoside monophosphate metabolic process	3	3	1	1	g1110;g504;g2509
GO:0009150	purine ribonucleotide metabolic process	3	3	1	1	g1110;g504;g2509
GO:0009156	ribonucleoside monophosphate biosynthetic process	3	3	1	1	g504;g2509;g11145
GO:0009167	purine ribonucleoside monophosphate metabolic process	3	3	1	1	g1110;g504;g2509
GO:0009260	ribonucleotide biosynthetic process	3	3	1	1	g6012;g504;g2509
GO:0009308	amine metabolic process	3	3	1	1	g10143;g502;g15134
GO:0009435	NAD biosynthetic process	3	3	1	1	g7749;g8896;g10143
GO:0009891	positive regulation of biosynthetic process	3	3	1	1	g1057;g475;g12225
GO:0009966	regulation of signal transduction	3	3	1	1	g727;g7038;g4127
GO:0010557	positive regulation of macromolecule biosynthetic process	3	3	1	1	g1057;g475;g12225
GO:0010608	posttranscriptional regulation of gene expression	3	3	1	1	g475;g4057;g12225
GO:0010628	positive regulation of gene expression	3	3	1	1	g1057;g475;g12225
GO:0010646	regulation of cell communication	3	3	1	1	g727;g7038;g4127
GO:0015893	drug transport	3	3	1	1	g15156;g6410;g11098
GO:0015992	proton transport	3	3	1	1	g12208;g9915;g11986
GO:0016051	carbohydrate biosynthetic process	3	3	1	1	g5932;g4623;g12130
GO:0016569	covalent chromatin modification	3	3	1	1	g6087;g8536;g12037
GO:0016570	histone modification	3	3	1	1	g6087;g8536;g12037
GO:0018208	peptidyl-proline modification	3	3	1	1	g2152;g15513;g10256
GO:0019318	hexose metabolic process	3	3	1	1	g5932;g15829;g1685
GO:0019359	nicotinamide nucleotide biosynthetic process	3	3	1	1	g7749;g8896;g10143
GO:0019363	pyridine nucleotide biosynthetic process	3	3	1	1	g7749;g8896;g10143
GO:0019674	NAD metabolic process	3	3	1	1	g7749;g8896;g10143
GO:0023051	regulation of signaling	3	3	1	1	g727;g7038;g4127
GO:0030258	lipid modification	3	3	1	1	g1768;g11142;g16101
GO:0030261	chromosome condensation	3	3	1	1	g5719;g16122;g13214
GO:0031328	positive regulation of cellular biosynthetic process	3	3	1	1	g1057;g475;g12225
GO:0032270	positive regulation of cellular protein metabolic process	3	3	1	1	g2663;g475;g12225
GO:0032392	DNA geometric change	3	3	1	1	g10811;g15889;g672
GO:0032940	secretion by cell	3	3	1	1	g3250;g3247;g7746
GO:0034248	regulation of cellular amide metabolic process	3	3	1	1	g475;g4057;g12225
GO:0035023	regulation of Rho protein signal transduction	3	3	1	1	g727;g7038;g4127
GO:0040029	regulation of gene expression, epigenetic	3	3	1	1	g5719;g672;g2488
GO:0042430	indole-containing compound metabolic process	3	3	1	1	g10143;g502;g15134
GO:0042493	response to drug	3	3	1	1	g15156;g6410;g11098
GO:0043038	amino acid activation	3	3	1	1	g6095;g4061;g11041
GO:0043039	tRNA aminoacylation	3	3	1	1	g6095;g4061;g11041
GO:0043254	regulation of protein complex assembly	3	3	1	1	g637;g1635;g1572
GO:0043623	cellular protein complex assembly	3	3	1	1	g4792;g12928;g5674
GO:0043648	dicarboxylic acid metabolic process	3	3	1	1	g1559;g10143;g9820
GO:0043650	dicarboxylic acid biosynthetic process	3	3	1	1	g1559;g10143;g9820
GO:0044042	glucan metabolic process	3	3	1	1	g11330;g4623;g7594
GO:0044087	regulation of cellular component biogenesis	3	3	1	1	g637;g1635;g1572
GO:0044106	cellular amine metabolic process	3	3	1	1	g10143;g502;g15134
GO:0044264	cellular polysaccharide metabolic process	3	3	1	1	g11330;g4623;g7594
GO:0044272	sulfur compound biosynthetic process	3	3	1	1	g7225;g7449;g5903
GO:0044275	cellular carbohydrate catabolic process	3	3	1	1	g11330;g7594;g14291
GO:0045017	glycerolipid biosynthetic process	3	3	1	1	g16101;g5678;g2971
GO:0045333	cellular respiration	3	3	1	1	g4910;g4289;g1110
GO:0045814	negative regulation of gene expression, epigenetic	3	3	1	1	g5719;g672;g2488
GO:0046112	nucleobase biosynthetic process	3	3	1	1	g504;g2509;g4762
GO:0046390	ribose phosphate biosynthetic process	3	3	1	1	g6012;g504;g2509
GO:0046467	membrane lipid biosynthetic process	3	3	1	1	g4211;g7416;g2971
GO:0046474	glycerophospholipid biosynthetic process	3	3	1	1	g16101;g5678;g2971
GO:0046578	regulation of Ras protein signal transduction	3	3	1	1	g727;g7038;g4127
GO:0046903	secretion	3	3	1	1	g3250;g3247;g7746
GO:0048583	regulation of response to stimulus	3	3	1	1	g727;g7038;g4127
GO:0050801	ion homeostasis	3	3	1	1	g11986;g12208;g2399
GO:0051056	regulation of small GTPase mediated signal transduction	3	3	1	1	g727;g7038;g4127
GO:0051247	positive regulation of protein metabolic process	3	3	1	1	g2663;g475;g12225
GO:0055080	cation homeostasis	3	3	1	1	g11986;g12208;g2399
GO:0070271	protein complex biogenesis	3	3	1	1	g4792;g12928;g5674
GO:0070887	cellular response to chemical stimulus	3	3	1	1	g5674;g16006;g8930
GO:0072525	pyridine-containing compound biosynthetic process	3	3	1	1	g7749;g8896;g10143
GO:0098656	anion transmembrane transport	3	3	1	1	g6962;g15911;g7359
GO:0098771	inorganic ion homeostasis	3	3	1	1	g11986;g12208;g2399
GO:0098813	nuclear chromosome segregation	3	3	1	1	g5719;g16122;g13214
GO:1901606	alpha-amino acid catabolic process	3	3	1	1	g10143;g5806;g15134
GO:1902531	regulation of intracellular signal transduction	3	3	1	1	g727;g7038;g4127
GO:1902600	hydrogen ion transmembrane transport	3	3	1	1	g12208;g9915;g11986
GO:0000054	ribosomal subunit export from nucleus	2	2	1	1	g7282;g15925
GO:0000082	G1/S transition of mitotic cell cycle	2	2	1	1	g3697;g11042
GO:0000103	sulfate assimilation	2	2	1	1	g7449;g5903
GO:0000393	spliceosomal conformational changes to generate catalytic conformation	2	2	1	1	g6138;g6125
GO:0000723	telomere maintenance	2	2	1	1	g10820;g672
GO:0000956	nuclear-transcribed mRNA catabolic process	2	2	1	1	g4289;g7453
GO:0001112	DNA-templated transcriptional open complex formation	2	2	1	1	g3788;g15889
GO:0001113	transcriptional open complex formation at RNA polymerase II promoter	2	2	1	1	g3788;g15889
GO:0001120	protein-DNA complex remodeling	2	2	1	1	g3788;g15889
GO:0001732	formation of cytoplasmic translation initiation complex	2	2	1	1	g12573;g4832
GO:0001932	regulation of protein phosphorylation	2	2	1	1	g7590;g4057
GO:0005977	glycogen metabolic process	2	2	1	1	g4623;g7594
GO:0005984	disaccharide metabolic process	2	2	1	1	g6254;g12130
GO:0005991	trehalose metabolic process	2	2	1	1	g6254;g12130
GO:0006066	alcohol metabolic process	2	2	1	1	g14291;g14321
GO:0006098	pentose-phosphate shunt	2	2	1	1	g6334;g2737
GO:0006099	tricarboxylic acid cycle	2	2	1	1	g4910;g4289
GO:0006101	citrate metabolic process	2	2	1	1	g4910;g4289
GO:0006112	energy reserve metabolic process	2	2	1	1	g4623;g7594
GO:0006164	purine nucleotide biosynthetic process	2	2	1	1	g504;g2509
GO:0006188	IMP biosynthetic process	2	2	1	1	g504;g2509
GO:0006189	'de novo' IMP biosynthetic process	2	2	1	1	g504;g2509
GO:0006261	DNA-dependent DNA replication	2	2	1	1	g5719;g16122
GO:0006265	DNA topological change	2	2	1	1	g5719;g16122
GO:0006271	DNA strand elongation involved in DNA replication	2	2	1	1	g5719;g16122
GO:0006310	DNA recombination	2	2	1	1	g672;g16122
GO:0006333	chromatin assembly or disassembly	2	2	1	1	g5719;g16122
GO:0006354	DNA-templated transcription, elongation	2	2	1	1	g6087;g5719
GO:0006368	transcription elongation from RNA polymerase II promoter	2	2	1	1	g6087;g5719
GO:0006400	tRNA modification	2	2	1	1	g3857;g16006
GO:0006402	mRNA catabolic process	2	2	1	1	g4289;g7453
GO:0006403	RNA localization	2	2	1	1	g15714;g15889
GO:0006405	RNA export from nucleus	2	2	1	1	g15714;g15889
GO:0006414	translational elongation	2	2	1	1	g12225;g7633
GO:0006526	arginine biosynthetic process	2	2	1	1	g3988;g8625
GO:0006569	tryptophan catabolic process	2	2	1	1	g10143;g15134
GO:0006623	protein targeting to vacuole	2	2	1	1	g12208;g3137
GO:0006631	fatty acid metabolic process	2	2	1	1	g10711;g15455
GO:0006633	fatty acid biosynthetic process	2	2	1	1	g10711;g15455
GO:0006661	phosphatidylinositol biosynthetic process	2	2	1	1	g16101;g2971
GO:0006664	glycolipid metabolic process	2	2	1	1	g4211;g2971
GO:0006665	sphingolipid metabolic process	2	2	1	1	g4211;g7416
GO:0006673	inositolphosphoceramide metabolic process	2	2	1	1	g4211;g7416
GO:0006739	NADP metabolic process	2	2	1	1	g6334;g2737
GO:0006797	polyphosphate metabolic process	2	2	1	1	g15457;g15911
GO:0006839	mitochondrial transport	2	2	1	1	g12425;g795
GO:0006885	regulation of pH	2	2	1	1	g11986;g12208
GO:0006903	vesicle targeting	2	2	1	1	g3250;g3247
GO:0006904	vesicle docking involved in exocytosis	2	2	1	1	g3250;g3247
GO:0007033	vacuole organization	2	2	1	1	g15457;g12208
GO:0007126	meiotic nuclear division	2	2	1	1	g672;g16122
GO:0007127	meiosis I	2	2	1	1	g672;g16122
GO:0007131	reciprocal meiotic recombination	2	2	1	1	g672;g16122
GO:0007186	G-protein coupled receptor signaling pathway	2	2	1	1	g8648;g10823
GO:0007346	regulation of mitotic cell cycle	2	2	1	1	g8930;g16122
GO:0008064	regulation of actin polymerization or depolymerization	2	2	1	1	g637;g1572
GO:0008643	carbohydrate transport	2	2	1	1	g6164;g5237
GO:0009060	aerobic respiration	2	2	1	1	g4910;g4289
GO:0009069	serine family amino acid metabolic process	2	2	1	1	g5806;g7225
GO:0009073	aromatic amino acid family biosynthetic process	2	2	1	1	g9820;g502
GO:0009074	aromatic amino acid family catabolic process	2	2	1	1	g10143;g15134
GO:0009081	branched-chain amino acid metabolic process	2	2	1	1	g3076;g4580
GO:0009082	branched-chain amino acid biosynthetic process	2	2	1	1	g3076;g4580
GO:0009113	purine nucleobase biosynthetic process	2	2	1	1	g504;g2509
GO:0009127	purine nucleoside monophosphate biosynthetic process	2	2	1	1	g504;g2509
GO:0009141	nucleoside triphosphate metabolic process	2	2	1	1	g6012;g1110
GO:0009152	purine ribonucleotide biosynthetic process	2	2	1	1	g504;g2509
GO:0009168	purine ribonucleoside monophosphate biosynthetic process	2	2	1	1	g504;g2509
GO:0009199	ribonucleoside triphosphate metabolic process	2	2	1	1	g6012;g1110
GO:0009225	nucleotide-sugar metabolic process	2	2	1	1	g8806;g8631
GO:0009247	glycolipid biosynthetic process	2	2	1	1	g4211;g2971
GO:0009251	glucan catabolic process	2	2	1	1	g11330;g7594
GO:0009310	amine catabolic process	2	2	1	1	g10143;g15134
GO:0009311	oligosaccharide metabolic process	2	2	1	1	g6254;g12130
GO:0009636	response to toxic substance	2	2	1	1	g9478;g4365
GO:0015074	DNA integration	2	2	1	1	g7908;g1377
GO:0015711	organic anion transport	2	2	1	1	g9672;g12425
GO:0015849	organic acid transport	2	2	1	1	g9672;g12425
GO:0016197	endosomal transport	2	2	1	1	g7665;g3137
GO:0016571	histone methylation	2	2	1	1	g8536;g12037
GO:0016579	protein deubiquitination	2	2	1	1	g1347;g9209
GO:0017004	cytochrome complex assembly	2	2	1	1	g4792;g12928
GO:0017038	protein import	2	2	1	1	g6710;g795
GO:0017062	respiratory chain complex III assembly	2	2	1	1	g4792;g12928
GO:0018022	peptidyl-lysine methylation	2	2	1	1	g8536;g12037
GO:0018205	peptidyl-lysine modification	2	2	1	1	g8536;g12037
GO:0019220	regulation of phosphate metabolic process	2	2	1	1	g7590;g4057
GO:0019673	GDP-mannose metabolic process	2	2	1	1	g8806;g8631
GO:0019682	glyceraldehyde-3-phosphate metabolic process	2	2	1	1	g6334;g2737
GO:0019725	cellular homeostasis	2	2	1	1	g9478;g12208
GO:0019751	polyol metabolic process	2	2	1	1	g14291;g14321
GO:0019932	second-messenger-mediated signaling	2	2	1	1	g15457;g1774
GO:0022406	membrane docking	2	2	1	1	g3250;g3247
GO:0022414	reproductive process	2	2	1	1	g672;g16122
GO:0022616	DNA strand elongation	2	2	1	1	g5719;g16122
GO:0030029	actin filament-based process	2	2	1	1	g637;g1048
GO:0030036	actin cytoskeleton organization	2	2	1	1	g637;g1048
GO:0030148	sphingolipid biosynthetic process	2	2	1	1	g4211;g7416
GO:0030259	lipid glycosylation	2	2	1	1	g1768;g11142
GO:0030832	regulation of actin filament length	2	2	1	1	g637;g1572
GO:0030833	regulation of actin filament polymerization	2	2	1	1	g637;g1572
GO:0031047	gene silencing by RNA	2	2	1	1	g5803;g2488
GO:0031399	regulation of protein modification process	2	2	1	1	g7590;g4057
GO:0032200	telomere organization	2	2	1	1	g10820;g672
GO:0032271	regulation of protein polymerization	2	2	1	1	g637;g1572
GO:0032508	DNA duplex unwinding	2	2	1	1	g10811;g15889
GO:0032535	regulation of cellular component size	2	2	1	1	g637;g1572
GO:0032956	regulation of actin cytoskeleton organization	2	2	1	1	g637;g1572
GO:0032970	regulation of actin filament-based process	2	2	1	1	g637;g1572
GO:0033043	regulation of organelle organization	2	2	1	1	g637;g1572
GO:0033108	mitochondrial respiratory chain complex assembly	2	2	1	1	g4792;g12928
GO:0033750	ribosome localization	2	2	1	1	g7282;g15925
GO:0033753	establishment of ribosome localization	2	2	1	1	g7282;g15925
GO:0034250	positive regulation of cellular amide metabolic process	2	2	1	1	g475;g12225
GO:0034367	macromolecular complex remodeling	2	2	1	1	g3788;g15889
GO:0034551	mitochondrial respiratory chain complex III assembly	2	2	1	1	g4792;g12928
GO:0034599	cellular response to oxidative stress	2	2	1	1	g5674;g16006
GO:0034637	cellular carbohydrate biosynthetic process	2	2	1	1	g4623;g12130
GO:0034968	histone lysine methylation	2	2	1	1	g8536;g12037
GO:0035335	peptidyl-tyrosine dephosphorylation	2	2	1	1	g470;g16122
GO:0035825	reciprocal DNA recombination	2	2	1	1	g672;g16122
GO:0042278	purine nucleoside metabolic process	2	2	1	1	g8896;g1110
GO:0042325	regulation of phosphorylation	2	2	1	1	g7590;g4057
GO:0042402	cellular biogenic amine catabolic process	2	2	1	1	g10143;g15134
GO:0042436	indole-containing compound catabolic process	2	2	1	1	g10143;g15134
GO:0042440	pigment metabolic process	2	2	1	1	g504;g2509
GO:0042537	benzene-containing compound metabolic process	2	2	1	1	g10143;g15134
GO:0043044	ATP-dependent chromatin remodeling	2	2	1	1	g5922;g15316
GO:0043547	positive regulation of GTPase activity	2	2	1	1	g9797;g11221
GO:0043549	regulation of kinase activity	2	2	1	1	g7590;g4057
GO:0044247	cellular polysaccharide catabolic process	2	2	1	1	g11330;g7594
GO:0044702	single organism reproductive process	2	2	1	1	g672;g16122
GO:0044724	single-organism carbohydrate catabolic process	2	2	1	1	g7594;g14291
GO:0044770	cell cycle phase transition	2	2	1	1	g11042;g3697
GO:0044772	mitotic cell cycle phase transition	2	2	1	1	g11042;g3697
GO:0044802	single-organism membrane organization	2	2	1	1	g15457;g3445
GO:0044843	cell cycle G1/S phase transition	2	2	1	1	g3697;g11042
GO:0045727	positive regulation of translation	2	2	1	1	g475;g12225
GO:0045786	negative regulation of cell cycle	2	2	1	1	g8930;g16122
GO:0045859	regulation of protein kinase activity	2	2	1	1	g7590;g4057
GO:0045930	negative regulation of mitotic cell cycle	2	2	1	1	g8930;g16122
GO:0045935	positive regulation of nucleobase-containing compound metabolic process	2	2	1	1	g1057;g672
GO:0046040	IMP metabolic process	2	2	1	1	g504;g2509
GO:0046128	purine ribonucleoside metabolic process	2	2	1	1	g8896;g1110
GO:0046148	pigment biosynthetic process	2	2	1	1	g504;g2509
GO:0046218	indolalkylamine catabolic process	2	2	1	1	g10143;g15134
GO:0046416	D-amino acid metabolic process	2	2	1	1	g3274;g15480
GO:0046488	phosphatidylinositol metabolic process	2	2	1	1	g16101;g2971
GO:0046618	drug export	2	2	1	1	g15156;g6410
GO:0046942	carboxylic acid transport	2	2	1	1	g9672;g12425
GO:0048193	Golgi vesicle transport	2	2	1	1	g9797;g2595
GO:0048278	vesicle docking	2	2	1	1	g3250;g3247
GO:0050657	nucleic acid transport	2	2	1	1	g15714;g15889
GO:0050658	RNA transport	2	2	1	1	g15714;g15889
GO:0051130	positive regulation of cellular component organization	2	2	1	1	g637;g12225
GO:0051156	glucose 6-phosphate metabolic process	2	2	1	1	g6334;g2737
GO:0051174	regulation of phosphorus metabolic process	2	2	1	1	g7590;g4057
GO:0051236	establishment of RNA localization	2	2	1	1	g15714;g15889
GO:0051321	meiotic cell cycle	2	2	1	1	g672;g16122
GO:0051338	regulation of transferase activity	2	2	1	1	g7590;g4057
GO:0051493	regulation of cytoskeleton organization	2	2	1	1	g637;g1572
GO:0051648	vesicle localization	2	2	1	1	g3250;g3247
GO:0051650	establishment of vesicle localization	2	2	1	1	g3250;g3247
GO:0051726	regulation of cell cycle	2	2	1	1	g8930;g16122
GO:0055065	metal ion homeostasis	2	2	1	1	g12208;g2399
GO:0055067	monovalent inorganic cation homeostasis	2	2	1	1	g11986;g12208
GO:0055070	copper ion homeostasis	2	2	1	1	g12208;g2399
GO:0055076	transition metal ion homeostasis	2	2	1	1	g12208;g2399
GO:0060249	anatomical structure homeostasis	2	2	1	1	g10820;g672
GO:0061024	membrane organization	2	2	1	1	g15457;g3445
GO:0070646	protein modification by small protein removal	2	2	1	1	g1347;g9209
GO:0070813	hydrogen sulfide metabolic process	2	2	1	1	g7449;g5903
GO:0070814	hydrogen sulfide biosynthetic process	2	2	1	1	g7449;g5903
GO:0071428	rRNA-containing ribonucleoprotein complex export from nucleus	2	2	1	1	g7282;g15925
GO:0071824	protein-DNA complex subunit organization	2	2	1	1	g3788;g15889
GO:0071897	DNA biosynthetic process	2	2	1	1	g7432;g3810
GO:0072330	monocarboxylic acid biosynthetic process	2	2	1	1	g10711;g15455
GO:0072350	tricarboxylic acid metabolic process	2	2	1	1	g4910;g4289
GO:0072522	purine-containing compound biosynthetic process	2	2	1	1	g504;g2509
GO:0072527	pyrimidine-containing compound metabolic process	2	2	1	1	g6012;g4762
GO:0072528	pyrimidine-containing compound biosynthetic process	2	2	1	1	g6012;g4762
GO:0072665	protein localization to vacuole	2	2	1	1	g12208;g3137
GO:0072666	establishment of protein localization to vacuole	2	2	1	1	g12208;g3137
GO:0090066	regulation of anatomical structure size	2	2	1	1	g637;g1572
GO:0090522	vesicle tethering involved in exocytosis	2	2	1	1	g3250;g3247
GO:0097033	mitochondrial respiratory chain complex III biogenesis	2	2	1	1	g4792;g12928
GO:0098754	detoxification	2	2	1	1	g9478;g4365
GO:1901136	carbohydrate derivative catabolic process	2	2	1	1	g8896;g14381
GO:1901264	carbohydrate derivative transport	2	2	1	1	g3660;g8610
GO:1901615	organic hydroxy compound metabolic process	2	2	1	1	g14291;g14321
GO:1903046	meiotic cell cycle process	2	2	1	1	g672;g16122
GO:1903509	liposaccharide metabolic process	2	2	1	1	g4211;g2971
GO:1990748	cellular detoxification	2	2	1	1	g9478;g4365
GO:0000027	ribosomal large subunit assembly	1	1	1	1	g7282
GO:0000032	cell wall mannoprotein biosynthetic process	1	1	1	1	g1160
GO:0000041	transition metal ion transport	1	1	1	1	g15911
GO:0000055	ribosomal large subunit export from nucleus	1	1	1	1	g7282
GO:0000075	cell cycle checkpoint	1	1	1	1	g16122
GO:0000083	regulation of transcription involved in G1/S transition of mitotic cell cycle	1	1	1	1	g3697
GO:0000086	G2/M transition of mitotic cell cycle	1	1	1	1	g11042
GO:0000105	histidine biosynthetic process	1	1	1	1	g4286
GO:0000122	negative regulation of transcription from RNA polymerase II promoter	1	1	1	1	g8930
GO:0000132	establishment of mitotic spindle orientation	1	1	1	1	g7564
GO:0000154	rRNA modification	1	1	1	1	g6281
GO:0000162	tryptophan biosynthetic process	1	1	1	1	g502
GO:0000183	chromatin silencing at rDNA	1	1	1	1	g5719
GO:0000244	spliceosomal tri-snRNP complex assembly	1	1	1	1	g3822
GO:0000271	polysaccharide biosynthetic process	1	1	1	1	g4623
GO:0000288	nuclear-transcribed mRNA catabolic process, deadenylation-dependent decay	1	1	1	1	g7453
GO:0000290	deadenylation-dependent decapping of nuclear-transcribed mRNA	1	1	1	1	g7453
GO:0000291	nuclear-transcribed mRNA catabolic process, exonucleolytic	1	1	1	1	g4289
GO:0000349	generation of catalytic spliceosome for first transesterification step	1	1	1	1	g6125
GO:0000350	generation of catalytic spliceosome for second transesterification step	1	1	1	1	g6138
GO:0000387	spliceosomal snRNP assembly	1	1	1	1	g3822
GO:0000460	maturation of 5.8S rRNA	1	1	1	1	g7282
GO:0000463	maturation of LSU-rRNA from tricistronic rRNA transcript (SSU-rRNA, 5.8S rRNA, LSU-rRNA)	1	1	1	1	g7282
GO:0000466	maturation of 5.8S rRNA from tricistronic rRNA transcript (SSU-rRNA, 5.8S rRNA, LSU-rRNA)	1	1	1	1	g7282
GO:0000470	maturation of LSU-rRNA	1	1	1	1	g7282
GO:0000712	resolution of meiotic recombination intermediates	1	1	1	1	g16122
GO:0000722	telomere maintenance via recombination	1	1	1	1	g672
GO:0000902	cell morphogenesis	1	1	1	1	g9133
GO:0000959	mitochondrial RNA metabolic process	1	1	1	1	g6095
GO:0001109	promoter clearance during DNA-templated transcription	1	1	1	1	g15889
GO:0001111	promoter clearance from RNA polymerase II promoter	1	1	1	1	g15889
GO:0001172	transcription, RNA-templated	1	1	1	1	g2488
GO:0001173	DNA-templated transcriptional start site selection	1	1	1	1	g3788
GO:0001174	transcriptional start site selection at RNA polymerase II promoter	1	1	1	1	g3788
GO:0001403	invasive growth in response to glucose limitation	1	1	1	1	g16006
GO:0001510	RNA methylation	1	1	1	1	g6281
GO:0001558	regulation of cell growth	1	1	1	1	g16006
GO:0002097	tRNA wobble base modification	1	1	1	1	g16006
GO:0002098	tRNA wobble uridine modification	1	1	1	1	g16006
GO:0002143	tRNA wobble position uridine thiolation	1	1	1	1	g16006
GO:0002191	cap-dependent translational initiation	1	1	1	1	g4832
GO:0002943	tRNA dihydrouridine synthesis	1	1	1	1	g3857
GO:0005978	glycogen biosynthetic process	1	1	1	1	g4623
GO:0005980	glycogen catabolic process	1	1	1	1	g7594
GO:0005992	trehalose biosynthetic process	1	1	1	1	g12130
GO:0006000	fructose metabolic process	1	1	1	1	g15829
GO:0006003	fructose 2,6-bisphosphate metabolic process	1	1	1	1	g15829
GO:0006006	glucose metabolic process	1	1	1	1	g5932
GO:0006013	mannose metabolic process	1	1	1	1	g1685
GO:0006020	inositol metabolic process	1	1	1	1	g14291
GO:0006022	aminoglycan metabolic process	1	1	1	1	g4435
GO:0006023	aminoglycan biosynthetic process	1	1	1	1	g4435
GO:0006030	chitin metabolic process	1	1	1	1	g4435
GO:0006031	chitin biosynthetic process	1	1	1	1	g4435
GO:0006040	amino sugar metabolic process	1	1	1	1	g4435
GO:0006056	mannoprotein metabolic process	1	1	1	1	g1160
GO:0006057	mannoprotein biosynthetic process	1	1	1	1	g1160
GO:0006071	glycerol metabolic process	1	1	1	1	g14321
GO:0006072	glycerol-3-phosphate metabolic process	1	1	1	1	g14381
GO:0006094	gluconeogenesis	1	1	1	1	g5932
GO:0006119	oxidative phosphorylation	1	1	1	1	g1110
GO:0006148	inosine catabolic process	1	1	1	1	g8896
GO:0006152	purine nucleoside catabolic process	1	1	1	1	g8896
GO:0006206	pyrimidine nucleobase metabolic process	1	1	1	1	g4762
GO:0006207	'de novo' pyrimidine nucleobase biosynthetic process	1	1	1	1	g4762
GO:0006213	pyrimidine nucleoside metabolic process	1	1	1	1	g6012
GO:0006220	pyrimidine nucleotide metabolic process	1	1	1	1	g6012
GO:0006221	pyrimidine nucleotide biosynthetic process	1	1	1	1	g6012
GO:0006241	CTP biosynthetic process	1	1	1	1	g6012
GO:0006275	regulation of DNA replication	1	1	1	1	g16122
GO:0006304	DNA modification	1	1	1	1	g3374
GO:0006307	DNA dealkylation involved in DNA repair	1	1	1	1	g3374
GO:0006311	meiotic gene conversion	1	1	1	1	g672
GO:0006312	mitotic recombination	1	1	1	1	g672
GO:0006359	regulation of transcription from RNA polymerase III promoter	1	1	1	1	g14315
GO:0006360	transcription from RNA polymerase I promoter	1	1	1	1	g1635
GO:0006406	mRNA export from nucleus	1	1	1	1	g15889
GO:0006409	tRNA export from nucleus	1	1	1	1	g15714
GO:0006419	alanyl-tRNA aminoacylation	1	1	1	1	g6095
GO:0006432	phenylalanyl-tRNA aminoacylation	1	1	1	1	g4061
GO:0006436	tryptophanyl-tRNA aminoacylation	1	1	1	1	g11041
GO:0006448	regulation of translational elongation	1	1	1	1	g12225
GO:0006449	regulation of translational termination	1	1	1	1	g12225
GO:0006452	translational frameshifting	1	1	1	1	g12225
GO:0006486	protein glycosylation	1	1	1	1	g1160
GO:0006493	protein O-linked glycosylation	1	1	1	1	g1160
GO:0006497	protein lipidation	1	1	1	1	g2971
GO:0006505	GPI anchor metabolic process	1	1	1	1	g2971
GO:0006506	GPI anchor biosynthetic process	1	1	1	1	g2971
GO:0006515	misfolded or incompletely synthesized protein catabolic process	1	1	1	1	g5674
GO:0006534	cysteine metabolic process	1	1	1	1	g7225
GO:0006535	cysteine biosynthetic process from serine	1	1	1	1	g7225
GO:0006536	glutamate metabolic process	1	1	1	1	g1559
GO:0006537	glutamate biosynthetic process	1	1	1	1	g1559
GO:0006544	glycine metabolic process	1	1	1	1	g5806
GO:0006546	glycine catabolic process	1	1	1	1	g5806
GO:0006547	histidine metabolic process	1	1	1	1	g4286
GO:0006551	leucine metabolic process	1	1	1	1	g4580
GO:0006560	proline metabolic process	1	1	1	1	g7249
GO:0006561	proline biosynthetic process	1	1	1	1	g7249
GO:0006563	L-serine metabolic process	1	1	1	1	g7225
GO:0006575	cellular modified amino acid metabolic process	1	1	1	1	g15134
GO:0006591	ornithine metabolic process	1	1	1	1	g3988
GO:0006592	ornithine biosynthetic process	1	1	1	1	g3988
GO:0006606	protein import into nucleus	1	1	1	1	g6710
GO:0006626	protein targeting to mitochondrion	1	1	1	1	g795
GO:0006636	unsaturated fatty acid biosynthetic process	1	1	1	1	g10711
GO:0006638	neutral lipid metabolic process	1	1	1	1	g4365
GO:0006639	acylglycerol metabolic process	1	1	1	1	g4365
GO:0006641	triglyceride metabolic process	1	1	1	1	g4365
GO:0006642	triglyceride mobilization	1	1	1	1	g4365
GO:0006675	mannosyl-inositol phosphorylceramide metabolic process	1	1	1	1	g4211
GO:0006687	glycosphingolipid metabolic process	1	1	1	1	g4211
GO:0006688	glycosphingolipid biosynthetic process	1	1	1	1	g4211
GO:0006720	isoprenoid metabolic process	1	1	1	1	g7614
GO:0006799	polyphosphate biosynthetic process	1	1	1	1	g15457
GO:0006813	potassium ion transport	1	1	1	1	g4153
GO:0006814	sodium ion transport	1	1	1	1	g11986
GO:0006817	phosphate ion transport	1	1	1	1	g15911
GO:0006821	chloride transport	1	1	1	1	g7359
GO:0006828	manganese ion transport	1	1	1	1	g15911
GO:0006842	tricarboxylic acid transport	1	1	1	1	g12425
GO:0006843	mitochondrial citrate transport	1	1	1	1	g12425
GO:0006855	drug transmembrane transport	1	1	1	1	g11098
GO:0006862	nucleotide transport	1	1	1	1	g8610
GO:0006865	amino acid transport	1	1	1	1	g9672
GO:0006869	lipid transport	1	1	1	1	g8942
GO:0006873	cellular ion homeostasis	1	1	1	1	g12208
GO:0006875	cellular metal ion homeostasis	1	1	1	1	g12208
GO:0006878	cellular copper ion homeostasis	1	1	1	1	g12208
GO:0006879	cellular iron ion homeostasis	1	1	1	1	g12208
GO:0006914	autophagy	1	1	1	1	g15457
GO:0006928	movement of cell or subcellular component	1	1	1	1	g7564
GO:0006997	nucleus organization	1	1	1	1	g3445
GO:0006998	nuclear envelope organization	1	1	1	1	g3445
GO:0007015	actin filament organization	1	1	1	1	g637
GO:0007018	microtubule-based movement	1	1	1	1	g7564
GO:0007035	vacuolar acidification	1	1	1	1	g12208
GO:0007051	spindle organization	1	1	1	1	g11225
GO:0007052	mitotic spindle organization	1	1	1	1	g11225
GO:0007093	mitotic cell cycle checkpoint	1	1	1	1	g16122
GO:0007097	nuclear migration	1	1	1	1	g5719
GO:0007114	cell budding	1	1	1	1	g16006
GO:0007163	establishment or maintenance of cell polarity	1	1	1	1	g7564
GO:0007264	small GTPase mediated signal transduction	1	1	1	1	g2852
GO:0008299	isoprenoid biosynthetic process	1	1	1	1	g7614
GO:0008617	guanosine metabolic process	1	1	1	1	g8896
GO:0009070	serine family amino acid biosynthetic process	1	1	1	1	g7225
GO:0009071	serine family amino acid catabolic process	1	1	1	1	g5806
GO:0009098	leucine biosynthetic process	1	1	1	1	g4580
GO:0009100	glycoprotein metabolic process	1	1	1	1	g1160
GO:0009101	glycoprotein biosynthetic process	1	1	1	1	g1160
GO:0009142	nucleoside triphosphate biosynthetic process	1	1	1	1	g6012
GO:0009144	purine nucleoside triphosphate metabolic process	1	1	1	1	g1110
GO:0009147	pyrimidine nucleoside triphosphate metabolic process	1	1	1	1	g6012
GO:0009148	pyrimidine nucleoside triphosphate biosynthetic process	1	1	1	1	g6012
GO:0009163	nucleoside biosynthetic process	1	1	1	1	g6012
GO:0009164	nucleoside catabolic process	1	1	1	1	g8896
GO:0009201	ribonucleoside triphosphate biosynthetic process	1	1	1	1	g6012
GO:0009205	purine ribonucleoside triphosphate metabolic process	1	1	1	1	g1110
GO:0009208	pyrimidine ribonucleoside triphosphate metabolic process	1	1	1	1	g6012
GO:0009209	pyrimidine ribonucleoside triphosphate biosynthetic process	1	1	1	1	g6012
GO:0009218	pyrimidine ribonucleotide metabolic process	1	1	1	1	g6012
GO:0009220	pyrimidine ribonucleotide biosynthetic process	1	1	1	1	g6012
GO:0009226	nucleotide-sugar biosynthetic process	1	1	1	1	g8806
GO:0009250	glucan biosynthetic process	1	1	1	1	g4623
GO:0009262	deoxyribonucleotide metabolic process	1	1	1	1	g2139
GO:0009263	deoxyribonucleotide biosynthetic process	1	1	1	1	g2139
GO:0009298	GDP-mannose biosynthetic process	1	1	1	1	g8806
GO:0009303	rRNA transcription	1	1	1	1	g1635
GO:0009309	amine biosynthetic process	1	1	1	1	g502
GO:0009312	oligosaccharide biosynthetic process	1	1	1	1	g12130
GO:0009314	response to radiation	1	1	1	1	g2682
GO:0009411	response to UV	1	1	1	1	g2682
GO:0009416	response to light stimulus	1	1	1	1	g2682
GO:0009423	chorismate biosynthetic process	1	1	1	1	g9820
GO:0009628	response to abiotic stimulus	1	1	1	1	g2682
GO:0009653	anatomical structure morphogenesis	1	1	1	1	g9133
GO:0010035	response to inorganic substance	1	1	1	1	g8930
GO:0010038	response to metal ion	1	1	1	1	g8930
GO:0010256	endomembrane system organization	1	1	1	1	g3445
GO:0010324	membrane invagination	1	1	1	1	g15457
GO:0010389	regulation of G2/M transition of mitotic cell cycle	1	1	1	1	g8930
GO:0010498	proteasomal protein catabolic process	1	1	1	1	g11042
GO:0010525	regulation of transposition, RNA-mediated	1	1	1	1	g15889
GO:0010528	regulation of transposition	1	1	1	1	g15889
GO:0010562	positive regulation of phosphorus metabolic process	1	1	1	1	g4057
GO:0010564	regulation of cell cycle process	1	1	1	1	g8930
GO:0010570	regulation of filamentous growth	1	1	1	1	g16006
GO:0010621	negative regulation of transcription by transcription factor localization	1	1	1	1	g8930
GO:0010638	positive regulation of organelle organization	1	1	1	1	g637
GO:0010639	negative regulation of organelle organization	1	1	1	1	g1572
GO:0010876	lipid localization	1	1	1	1	g8942
GO:0010948	negative regulation of cell cycle process	1	1	1	1	g8930
GO:0010952	positive regulation of peptidase activity	1	1	1	1	g2663
GO:0010972	negative regulation of G2/M transition of mitotic cell cycle	1	1	1	1	g8930
GO:0015693	magnesium ion transport	1	1	1	1	g3866
GO:0015703	chromate transport	1	1	1	1	g11825
GO:0015746	citrate transport	1	1	1	1	g12425
GO:0015748	organophosphate ester transport	1	1	1	1	g8610
GO:0015780	nucleotide-sugar transport	1	1	1	1	g8610
GO:0015783	GDP-fucose transport	1	1	1	1	g8610
GO:0015858	nucleoside transport	1	1	1	1	g3660
GO:0015942	formate metabolic process	1	1	1	1	g5849
GO:0015988	energy coupled proton transmembrane transport, against electrochemical gradient	1	1	1	1	g12208
GO:0015991	ATP hydrolysis coupled proton transport	1	1	1	1	g12208
GO:0016024	CDP-diacylglycerol biosynthetic process	1	1	1	1	g5678
GO:0016042	lipid catabolic process	1	1	1	1	g4365
GO:0016074	snoRNA metabolic process	1	1	1	1	g6125
GO:0016226	iron-sulfur cluster assembly	1	1	1	1	g16047
GO:0016237	lysosomal microautophagy	1	1	1	1	g15457
GO:0016480	negative regulation of transcription from RNA polymerase III promoter	1	1	1	1	g14315
GO:0016973	poly(A)+ mRNA export from nucleus	1	1	1	1	g15889
GO:0017182	peptidyl-diphthamide metabolic process	1	1	1	1	g821
GO:0017183	peptidyl-diphthamide biosynthetic process from peptidyl-histidine	1	1	1	1	g821
GO:0018108	peptidyl-tyrosine phosphorylation	1	1	1	1	g12080
GO:0018117	protein adenylylation	1	1	1	1	g16006
GO:0018175	protein nucleotidylation	1	1	1	1	g16006
GO:0018192	enzyme active site formation via cysteine modification to L-cysteine persulfide	1	1	1	1	g16006
GO:0018198	peptidyl-cysteine modification	1	1	1	1	g16006
GO:0018202	peptidyl-histidine modification	1	1	1	1	g821
GO:0018212	peptidyl-tyrosine modification	1	1	1	1	g12080
GO:0018307	enzyme active site formation	1	1	1	1	g16006
GO:0019310	inositol catabolic process	1	1	1	1	g14291
GO:0019319	hexose biosynthetic process	1	1	1	1	g5932
GO:0019344	cysteine biosynthetic process	1	1	1	1	g7225
GO:0019357	nicotinate nucleotide biosynthetic process	1	1	1	1	g8896
GO:0019358	nicotinate nucleotide salvage	1	1	1	1	g8896
GO:0019365	pyridine nucleotide salvage	1	1	1	1	g8896
GO:0019400	alditol metabolic process	1	1	1	1	g14321
GO:0019441	tryptophan catabolic process to kynurenine	1	1	1	1	g15134
GO:0019722	calcium-mediated signaling	1	1	1	1	g1774
GO:0019805	quinolinate biosynthetic process	1	1	1	1	g10143
GO:0019856	pyrimidine nucleobase biosynthetic process	1	1	1	1	g4762
GO:0019954	asexual reproduction	1	1	1	1	g16006
GO:0022411	cellular component disassembly	1	1	1	1	g4773
GO:0022900	electron transport chain	1	1	1	1	g1110
GO:0022904	respiratory electron transport chain	1	1	1	1	g1110
GO:0030003	cellular cation homeostasis	1	1	1	1	g12208
GO:0030004	cellular monovalent inorganic cation homeostasis	1	1	1	1	g12208
GO:0030010	establishment of cell polarity	1	1	1	1	g7564
GO:0030150	protein import into mitochondrial matrix	1	1	1	1	g795
GO:0030162	regulation of proteolysis	1	1	1	1	g2663
GO:0030243	cellulose metabolic process	1	1	1	1	g11330
GO:0030245	cellulose catabolic process	1	1	1	1	g11330
GO:0030447	filamentous growth	1	1	1	1	g16006
GO:0030491	heteroduplex formation	1	1	1	1	g672
GO:0030641	regulation of cellular pH	1	1	1	1	g12208
GO:0030702	chromatin silencing at centromere	1	1	1	1	g672
GO:0030837	negative regulation of actin filament polymerization	1	1	1	1	g1572
GO:0030838	positive regulation of actin filament polymerization	1	1	1	1	g637
GO:0031048	chromatin silencing by small RNA	1	1	1	1	g2488
GO:0031055	chromatin remodeling at centromere	1	1	1	1	g16122
GO:0031136	positive regulation of conjugation	1	1	1	1	g2080
GO:0031137	regulation of conjugation with cellular fusion	1	1	1	1	g2080
GO:0031139	positive regulation of conjugation with cellular fusion	1	1	1	1	g2080
GO:0031146	SCF-dependent proteasomal ubiquitin-dependent protein catabolic process	1	1	1	1	g11042
GO:0031163	metallo-sulfur cluster assembly	1	1	1	1	g16047
GO:0031167	rRNA methylation	1	1	1	1	g6281
GO:0031333	negative regulation of protein complex assembly	1	1	1	1	g1572
GO:0031334	positive regulation of protein complex assembly	1	1	1	1	g637
GO:0031506	cell wall glycoprotein biosynthetic process	1	1	1	1	g1160
GO:0031570	DNA integrity checkpoint	1	1	1	1	g16122
GO:0031929	TOR signaling	1	1	1	1	g2080
GO:0032069	regulation of nuclease activity	1	1	1	1	g672
GO:0032070	regulation of deoxyribonuclease activity	1	1	1	1	g672
GO:0032071	regulation of endodeoxyribonuclease activity	1	1	1	1	g672
GO:0032075	positive regulation of nuclease activity	1	1	1	1	g672
GO:0032077	positive regulation of deoxyribonuclease activity	1	1	1	1	g672
GO:0032079	positive regulation of endodeoxyribonuclease activity	1	1	1	1	g672
GO:0032272	negative regulation of protein polymerization	1	1	1	1	g1572
GO:0032273	positive regulation of protein polymerization	1	1	1	1	g637
GO:0032447	protein urmylation	1	1	1	1	g16006
GO:0032502	developmental process	1	1	1	1	g9133
GO:0032505	reproduction of a single-celled organism	1	1	1	1	g16006
GO:0032509	endosome transport via multivesicular body sorting pathway	1	1	1	1	g3137
GO:0032511	late endosome to vacuole transport via multivesicular body sorting pathway	1	1	1	1	g3137
GO:0032543	mitochondrial translation	1	1	1	1	g6095
GO:0032984	macromolecular complex disassembly	1	1	1	1	g4773
GO:0032989	cellular component morphogenesis	1	1	1	1	g9133
GO:0033013	tetrapyrrole metabolic process	1	1	1	1	g3987
GO:0033014	tetrapyrrole biosynthetic process	1	1	1	1	g3987
GO:0033559	unsaturated fatty acid metabolic process	1	1	1	1	g10711
GO:0033674	positive regulation of kinase activity	1	1	1	1	g4057
GO:0033683	nucleotide-excision repair, DNA incision	1	1	1	1	g15889
GO:0033692	cellular polysaccharide biosynthetic process	1	1	1	1	g4623
GO:0034227	tRNA thio-modification	1	1	1	1	g16006
GO:0034247	snoRNA splicing	1	1	1	1	g6125
GO:0034314	Arp2/3 complex-mediated actin nucleation	1	1	1	1	g637
GO:0034354	'de novo' NAD biosynthetic process from tryptophan	1	1	1	1	g10143
GO:0034356	NAD biosynthesis via nicotinamide riboside salvage pathway	1	1	1	1	g8896
GO:0034427	nuclear-transcribed mRNA catabolic process, exonucleolytic, 3'-5'	1	1	1	1	g4289
GO:0034504	protein localization to nucleus	1	1	1	1	g6710
GO:0034627	'de novo' NAD biosynthetic process	1	1	1	1	g10143
GO:0034644	cellular response to UV	1	1	1	1	g2682
GO:0035268	protein mannosylation	1	1	1	1	g1160
GO:0035269	protein O-linked mannosylation	1	1	1	1	g1160
GO:0035494	SNARE complex disassembly	1	1	1	1	g4773
GO:0035510	DNA dealkylation	1	1	1	1	g3374
GO:0035725	sodium ion transmembrane transport	1	1	1	1	g11986
GO:0035822	gene conversion	1	1	1	1	g672
GO:0036079	purine nucleotide-sugar transport	1	1	1	1	g8610
GO:0036085	GDP-fucose import into Golgi lumen	1	1	1	1	g8610
GO:0036092	phosphatidylinositol-3-phosphate biosynthetic process	1	1	1	1	g16101
GO:0036267	invasive filamentous growth	1	1	1	1	g16006
GO:0036297	interstrand cross-link repair	1	1	1	1	g2682
GO:0040001	establishment of mitotic spindle localization	1	1	1	1	g7564
GO:0040007	growth	1	1	1	1	g16006
GO:0040008	regulation of growth	1	1	1	1	g16006
GO:0040023	establishment of nucleus localization	1	1	1	1	g5719
GO:0042026	protein refolding	1	1	1	1	g795
GO:0042144	vacuole fusion, non-autophagic	1	1	1	1	g15457
GO:0042157	lipoprotein metabolic process	1	1	1	1	g2971
GO:0042158	lipoprotein biosynthetic process	1	1	1	1	g2971
GO:0042180	cellular ketone metabolic process	1	1	1	1	g15134
GO:0042183	formate catabolic process	1	1	1	1	g5849
GO:0042255	ribosome assembly	1	1	1	1	g7282
GO:0042273	ribosomal large subunit biogenesis	1	1	1	1	g7282
GO:0042327	positive regulation of phosphorylation	1	1	1	1	g4057
GO:0042401	cellular biogenic amine biosynthetic process	1	1	1	1	g502
GO:0042435	indole-containing compound biosynthetic process	1	1	1	1	g502
GO:0042450	arginine biosynthetic process via ornithine	1	1	1	1	g3988
GO:0042454	ribonucleoside catabolic process	1	1	1	1	g8896
GO:0042455	ribonucleoside biosynthetic process	1	1	1	1	g6012
GO:0042546	cell wall biogenesis	1	1	1	1	g1160
GO:0042773	ATP synthesis coupled electron transport	1	1	1	1	g1110
GO:0042790	transcription of nuclear large rRNA transcript from RNA polymerase I promoter	1	1	1	1	g1635
GO:0043094	cellular metabolic compound salvage	1	1	1	1	g8896
GO:0043144	snoRNA processing	1	1	1	1	g6125
GO:0043161	proteasome-mediated ubiquitin-dependent protein catabolic process	1	1	1	1	g11042
GO:0043162	ubiquitin-dependent protein catabolic process via the multivesicular body sorting pathway	1	1	1	1	g3137
GO:0043173	nucleotide salvage	1	1	1	1	g8896
GO:0043241	protein complex disassembly	1	1	1	1	g4773
GO:0043243	positive regulation of protein complex disassembly	1	1	1	1	g12225
GO:0043244	regulation of protein complex disassembly	1	1	1	1	g12225
GO:0043328	protein targeting to vacuole involved in ubiquitin-dependent protein catabolic process via the multivesicular body sorting pathway	1	1	1	1	g3137
GO:0043388	positive regulation of DNA binding	1	1	1	1	g3788
GO:0043413	macromolecule glycosylation	1	1	1	1	g1160
GO:0043420	anthranilate metabolic process	1	1	1	1	g10143
GO:0043545	molybdopterin cofactor metabolic process	1	1	1	1	g4821
GO:0043624	cellular protein complex disassembly	1	1	1	1	g4773
GO:0043900	regulation of multi-organism process	1	1	1	1	g2080
GO:0043902	positive regulation of multi-organism process	1	1	1	1	g2080
GO:0044036	cell wall macromolecule metabolic process	1	1	1	1	g1160
GO:0044038	cell wall macromolecule biosynthetic process	1	1	1	1	g1160
GO:0044089	positive regulation of cellular component biogenesis	1	1	1	1	g637
GO:0044182	filamentous growth of a population of unicellular organisms	1	1	1	1	g16006
GO:0044210	'de novo' CTP biosynthetic process	1	1	1	1	g6012
GO:0044743	intracellular protein transmembrane import	1	1	1	1	g795
GO:0044744	protein targeting to nucleus	1	1	1	1	g6710
GO:0044767	single-organism developmental process	1	1	1	1	g9133
GO:0044774	mitotic DNA integrity checkpoint	1	1	1	1	g16122
GO:0044801	single-organism membrane fusion	1	1	1	1	g15457
GO:0044839	cell cycle G2/M phase transition	1	1	1	1	g11042
GO:0044845	chain elongation of O-linked mannose residue	1	1	1	1	g1160
GO:0045010	actin nucleation	1	1	1	1	g637
GO:0045132	meiotic chromosome segregation	1	1	1	1	g16122
GO:0045324	late endosome to vacuole transport	1	1	1	1	g3137
GO:0045454	cell redox homeostasis	1	1	1	1	g9478
GO:0045851	pH reduction	1	1	1	1	g12208
GO:0045862	positive regulation of proteolysis	1	1	1	1	g2663
GO:0045893	positive regulation of transcription, DNA-templated	1	1	1	1	g1057
GO:0045898	regulation of RNA polymerase II transcriptional preinitiation complex assembly	1	1	1	1	g1635
GO:0045901	positive regulation of translational elongation	1	1	1	1	g12225
GO:0045905	positive regulation of translational termination	1	1	1	1	g12225
GO:0045937	positive regulation of phosphate metabolic process	1	1	1	1	g4057
GO:0045944	positive regulation of transcription from RNA polymerase II promoter	1	1	1	1	g1057
GO:0046034	ATP metabolic process	1	1	1	1	g1110
GO:0046036	CTP metabolic process	1	1	1	1	g6012
GO:0046083	adenine metabolic process	1	1	1	1	g504
GO:0046102	inosine metabolic process	1	1	1	1	g8896
GO:0046115	guanosine catabolic process	1	1	1	1	g8896
GO:0046130	purine ribonucleoside catabolic process	1	1	1	1	g8896
GO:0046131	pyrimidine ribonucleoside metabolic process	1	1	1	1	g6012
GO:0046132	pyrimidine ribonucleoside biosynthetic process	1	1	1	1	g6012
GO:0046134	pyrimidine nucleoside biosynthetic process	1	1	1	1	g6012
GO:0046164	alcohol catabolic process	1	1	1	1	g14291
GO:0046168	glycerol-3-phosphate catabolic process	1	1	1	1	g14381
GO:0046174	polyol catabolic process	1	1	1	1	g14291
GO:0046219	indolalkylamine biosynthetic process	1	1	1	1	g502
GO:0046341	CDP-diacylglycerol metabolic process	1	1	1	1	g5678
GO:0046349	amino sugar biosynthetic process	1	1	1	1	g4435
GO:0046351	disaccharide biosynthetic process	1	1	1	1	g12130
GO:0046364	monosaccharide biosynthetic process	1	1	1	1	g5932
GO:0046417	chorismate metabolic process	1	1	1	1	g9820
GO:0046434	organophosphate catabolic process	1	1	1	1	g14381
GO:0046497	nicotinate nucleotide metabolic process	1	1	1	1	g8896
GO:0046834	lipid phosphorylation	1	1	1	1	g16101
GO:0046835	carbohydrate phosphorylation	1	1	1	1	g15829
GO:0046854	phosphatidylinositol phosphorylation	1	1	1	1	g16101
GO:0046874	quinolinate metabolic process	1	1	1	1	g10143
GO:0046916	cellular transition metal ion homeostasis	1	1	1	1	g12208
GO:0046950	cellular ketone body metabolic process	1	1	1	1	g1598
GO:0046952	ketone body catabolic process	1	1	1	1	g1598
GO:0046999	regulation of conjugation	1	1	1	1	g2080
GO:0048015	phosphatidylinositol-mediated signaling	1	1	1	1	g16101
GO:0048016	inositol phosphate-mediated signaling	1	1	1	1	g15457
GO:0048017	inositol lipid-mediated signaling	1	1	1	1	g16101
GO:0048284	organelle fusion	1	1	1	1	g15457
GO:0048856	anatomical structure development	1	1	1	1	g9133
GO:0048869	cellular developmental process	1	1	1	1	g9133
GO:0050793	regulation of developmental process	1	1	1	1	g15911
GO:0051012	microtubule sliding	1	1	1	1	g7564
GO:0051028	mRNA transport	1	1	1	1	g15889
GO:0051031	tRNA transport	1	1	1	1	g15714
GO:0051054	positive regulation of DNA metabolic process	1	1	1	1	g672
GO:0051098	regulation of binding	1	1	1	1	g3788
GO:0051099	positive regulation of binding	1	1	1	1	g3788
GO:0051101	regulation of DNA binding	1	1	1	1	g3788
GO:0051123	RNA polymerase II transcriptional preinitiation complex assembly	1	1	1	1	g3788
GO:0051129	negative regulation of cellular component organization	1	1	1	1	g1572
GO:0051131	chaperone-mediated protein complex assembly	1	1	1	1	g5674
GO:0051170	nuclear import	1	1	1	1	g6710
GO:0051189	prosthetic group metabolic process	1	1	1	1	g4821
GO:0051254	positive regulation of RNA metabolic process	1	1	1	1	g1057
GO:0051273	beta-glucan metabolic process	1	1	1	1	g11330
GO:0051275	beta-glucan catabolic process	1	1	1	1	g11330
GO:0051293	establishment of spindle localization	1	1	1	1	g7564
GO:0051294	establishment of spindle orientation	1	1	1	1	g7564
GO:0051304	chromosome separation	1	1	1	1	g16122
GO:0051306	mitotic sister chromatid separation	1	1	1	1	g16122
GO:0051307	meiotic chromosome separation	1	1	1	1	g16122
GO:0051347	positive regulation of transferase activity	1	1	1	1	g4057
GO:0051452	intracellular pH reduction	1	1	1	1	g12208
GO:0051453	regulation of intracellular pH	1	1	1	1	g12208
GO:0051494	negative regulation of cytoskeleton organization	1	1	1	1	g1572
GO:0051495	positive regulation of cytoskeleton organization	1	1	1	1	g637
GO:0051568	histone H3-K4 methylation	1	1	1	1	g8536
GO:0051592	response to calcium ion	1	1	1	1	g8930
GO:0051604	protein maturation	1	1	1	1	g10700
GO:0051647	nucleus localization	1	1	1	1	g5719
GO:0051653	spindle localization	1	1	1	1	g7564
GO:0051999	mannosyl-inositol phosphorylceramide biosynthetic process	1	1	1	1	g4211
GO:0052547	regulation of peptidase activity	1	1	1	1	g2663
GO:0052646	alditol phosphate metabolic process	1	1	1	1	g14381
GO:0052803	imidazole-containing compound metabolic process	1	1	1	1	g4286
GO:0055072	iron ion homeostasis	1	1	1	1	g12208
GO:0055082	cellular chemical homeostasis	1	1	1	1	g12208
GO:0055088	lipid homeostasis	1	1	1	1	g3445
GO:0060260	regulation of transcription initiation from RNA polymerase II promoter	1	1	1	1	g1635
GO:0061025	membrane fusion	1	1	1	1	g15457
GO:0065002	intracellular protein transmembrane transport	1	1	1	1	g795
GO:0065004	protein-DNA complex assembly	1	1	1	1	g3788
GO:0070127	tRNA aminoacylation for mitochondrial protein translation	1	1	1	1	g6095
GO:0070143	mitochondrial alanyl-tRNA aminoacylation	1	1	1	1	g6095
GO:0070189	kynurenine metabolic process	1	1	1	1	g15134
GO:0070407	oxidation-dependent protein catabolic process	1	1	1	1	g5674
GO:0070585	protein localization to mitochondrion	1	1	1	1	g795
GO:0070589	cellular component macromolecule biosynthetic process	1	1	1	1	g1160
GO:0070783	growth of unicellular organism as a thread of attached cells	1	1	1	1	g16006
GO:0070784	regulation of growth of unicellular organism as a thread of attached cells	1	1	1	1	g16006
GO:0070816	phosphorylation of RNA polymerase II C-terminal domain	1	1	1	1	g15889
GO:0070838	divalent metal ion transport	1	1	1	1	g3866
GO:0070897	DNA-templated transcriptional preinitiation complex assembly	1	1	1	1	g3788
GO:0070914	UV-damage excision repair	1	1	1	1	g2682
GO:0070925	organelle assembly	1	1	1	1	g7282
GO:0071108	protein K48-linked deubiquitination	1	1	1	1	g1347
GO:0071214	cellular response to abiotic stimulus	1	1	1	1	g2682
GO:0071241	cellular response to inorganic substance	1	1	1	1	g8930
GO:0071248	cellular response to metal ion	1	1	1	1	g8930
GO:0071277	cellular response to calcium ion	1	1	1	1	g8930
GO:0071421	manganese ion transmembrane transport	1	1	1	1	g15911
GO:0071427	mRNA-containing ribonucleoprotein complex export from nucleus	1	1	1	1	g15889
GO:0071431	tRNA-containing ribonucleoprotein complex export from nucleus	1	1	1	1	g15714
GO:0071478	cellular response to radiation	1	1	1	1	g2682
GO:0071482	cellular response to light stimulus	1	1	1	1	g2682
GO:0071528	tRNA re-export from nucleus	1	1	1	1	g15714
GO:0071554	cell wall organization or biogenesis	1	1	1	1	g1160
GO:0071804	cellular potassium ion transport	1	1	1	1	g4153
GO:0071805	potassium ion transmembrane transport	1	1	1	1	g4153
GO:0071806	protein transmembrane transport	1	1	1	1	g795
GO:0072329	monocarboxylic acid catabolic process	1	1	1	1	g5849
GO:0072511	divalent inorganic cation transport	1	1	1	1	g3866
GO:0072523	purine-containing compound catabolic process	1	1	1	1	g8896
GO:0072530	purine-containing compound transmembrane transport	1	1	1	1	g8610
GO:0072655	establishment of protein localization to mitochondrion	1	1	1	1	g795
GO:0090329	regulation of DNA-dependent DNA replication	1	1	1	1	g16122
GO:0090342	regulation of cell aging	1	1	1	1	g15911
GO:0090480	purine nucleotide-sugar transmembrane transport	1	1	1	1	g8610
GO:0090501	RNA phosphodiester bond hydrolysis	1	1	1	1	g4289
GO:0090503	RNA phosphodiester bond hydrolysis, exonucleolytic	1	1	1	1	g4289
GO:0090662	ATP hydrolysis coupled transmembrane transport	1	1	1	1	g12208
GO:0097046	replication fork progression beyond termination site	1	1	1	1	g16122
GO:0097080	plasma membrane selenite transport	1	1	1	1	g15911
GO:0097428	protein maturation by iron-sulfur cluster transfer	1	1	1	1	g10700
GO:0097502	mannosylation	1	1	1	1	g1160
GO:0097576	vacuole fusion	1	1	1	1	g15457
GO:0098661	inorganic anion transmembrane transport	1	1	1	1	g7359
GO:0098781	ncRNA transcription	1	1	1	1	g1635
GO:0098822	peptidyl-cysteine modification to L-cysteine persulfide	1	1	1	1	g16006
GO:0098869	cellular oxidant detoxification	1	1	1	1	g9478
GO:1900062	regulation of replicative cell aging	1	1	1	1	g15911
GO:1900428	regulation of filamentous growth of a population of unicellular organisms	1	1	1	1	g16006
GO:1901068	guanosine-containing compound metabolic process	1	1	1	1	g8896
GO:1901069	guanosine-containing compound catabolic process	1	1	1	1	g8896
GO:1901071	glucosamine-containing compound metabolic process	1	1	1	1	g4435
GO:1901073	glucosamine-containing compound biosynthetic process	1	1	1	1	g4435
GO:1901255	nucleotide-excision repair involved in interstrand cross-link repair	1	1	1	1	g2682
GO:1901616	organic hydroxy compound catabolic process	1	1	1	1	g14291
GO:1901642	nucleoside transmembrane transport	1	1	1	1	g3660
GO:1901658	glycosyl compound catabolic process	1	1	1	1	g8896
GO:1901659	glycosyl compound biosynthetic process	1	1	1	1	g6012
GO:1901679	nucleotide transmembrane transport	1	1	1	1	g8610
GO:1901987	regulation of cell cycle phase transition	1	1	1	1	g8930
GO:1901988	negative regulation of cell cycle phase transition	1	1	1	1	g8930
GO:1901990	regulation of mitotic cell cycle phase transition	1	1	1	1	g8930
GO:1901991	negative regulation of mitotic cell cycle phase transition	1	1	1	1	g8930
GO:1902224	ketone body metabolic process	1	1	1	1	g1598
GO:1902476	chloride transmembrane transport	1	1	1	1	g7359
GO:1902534	single-organism membrane invagination	1	1	1	1	g15457
GO:1902593	single-organism nuclear import	1	1	1	1	g6710
GO:1902680	positive regulation of RNA biosynthetic process	1	1	1	1	g1057
GO:1902749	regulation of cell cycle G2/M phase transition	1	1	1	1	g8930
GO:1902750	negative regulation of cell cycle G2/M phase transition	1	1	1	1	g8930
GO:1903508	positive regulation of nucleic acid-templated transcription	1	1	1	1	g1057
GO:1990074	polyuridylation-dependent mRNA catabolic process	1	1	1	1	g4289
GO:1990542	mitochondrial transmembrane transport	1	1	1	1	g795
GO:2000142	regulation of DNA-templated transcription, initiation	1	1	1	1	g1635
GO:2000220	regulation of pseudohyphal growth	1	1	1	1	g16006
GO:2000241	regulation of reproductive process	1	1	1	1	g2080
GO:2000243	positive regulation of reproductive process	1	1	1	1	g2080
GO:2000621	regulation of DNA replication termination	1	1	1	1	g16122
GO:2000677	regulation of transcription regulatory region DNA binding	1	1	1	1	g3788
GO:2000679	positive regulation of transcription regulatory region DNA binding	1	1	1	1	g3788
