# Supplementary material for: A Comprehensive Assessment of Ultraviolet-Radiation-Induced Mutations in Flammulina filiformis Using Whole-Genome Resequencing
Source: MDPI journal article supplement (doi:10.3390/jof10030228), 2024-03-20
Supplement: s1 [file s1]

Table Effects of flanking bases on mutation frequency of adenine

| Motif              | Base substitution |        |        | Total |
|--------------------|-------------------|--------|--------|-------|
|                    | A→G               | A→T    | A→C    |       |
| AAA                | 63                | 13     | 11     | 87    |
| TAA                | 178               | 72     | 66     | 316   |
| CAA                | 63                | 14     | 7      | 84    |
| GAA                | 54                | 11     | 2      | 67    |
| AAT                | 49                | 102    | 14     | 165   |
| TAT                | 32                | 62     | 10     | 104   |
| CAT                | 15                | 18     | 3      | 36    |
| GAT                | 14                | 16     | 4      | 34    |
| AAC                | 6                 | 16     | 4      | 26    |
| TAC                | 3                 | 18     | 2      | 23    |
| CAC                | 3                 | 5      | 2      | 10    |
| GAC                | 6                 | 4      | 0      | 10    |
| AAG                | 57                | 18     | 3      | 78    |
| TAG                | 71                | 14     | 5      | 90    |
| CAG                | 21                | 4      | 1      | 26    |
| GAG                | 16                | 7      | 1      | 24    |
| Total              | 651               | 394    | 135    | 1 180 |
| Mutation frequency | 55.17%            | 33.39% | 11.44% | 100%  |

Table Effects of flanking bases on mutation frequency of cytosine

| Motif              | Base substitution |       |       | Total |
|--------------------|-------------------|-------|-------|-------|
|                    | C→T               | C→A   | C→G   |       |
| ACA                | 39                | 13    | 3     | 55    |
| TCA                | 226               | 24    | 8     | 258   |
| CCA                | 149               | 33    | 5     | 187   |
| GCA                | 17                | 3     | 6     | 26    |
| ACT                | 141               | 8     | 3     | 152   |
| TCT                | 352               | 20    | 6     | 378   |
| CCT                | 211               | 16    | 4     | 231   |
| GCT                | 67                | 6     | 0     | 73    |
| ACC                | 106               | 18    | 2     | 126   |
| TCC                | 348               | 31    | 4     | 383   |
| CCC                | 175               | 8     | 5     | 188   |
| GCC                | 55                | 8     | 2     | 65    |
| ACG                | 32                | 8     | 7     | 47    |
| TCG                | 216               | 14    | 5     | 235   |
| CCG                | 92                | 9     | 5     | 106   |
| GCG                | 13                | 2     | 2     | 17    |
| Total              | 2 239             | 221   | 67    | 2 527 |
| Mutation frequency | 88.60%            | 8.75% | 2.65% | 100%  |

Table Total number of motifs in *Flammulina filiformis*

| Base at 5' side of adenine  |           |           |           |           |
|-----------------------------|-----------|-----------|-----------|-----------|
| motif                       | AA        | TA        | CA        | GA        |
| number                      | 3 897 395 | 4 277 842 | 4 800 411 | 5 153 977 |
| Base at 3' side of adenine  |           |           |           |           |
| motif                       | AA        | AT        | AC        | AG        |
| number                      | 3 897 395 | 4 287 842 | 4 803 034 | 5 153 631 |
| Base at 5' side of cytosine |           |           |           |           |
| motif                       | AC        | TC        | CC        | GC        |
| number                      | 4 803 034 | 4 716 410 | 3 605 656 | 4 571 199 |
| Base at 3' side of cytosine |           |           |           |           |
| motif                       | CA        | CT        | CC        | CG        |
| number                      | 4 800 411 | 4 976 392 | 3 605 656 | 4 573 199 |
