# Supplementary material for: A Comprehensive Assessment of Ultraviolet-Radiation-Induced Mutations in Flammulina filiformis Using Whole-Genome Resequencing
Source: MDPI journal article supplement (doi:10.3390/jof10030228), 2024-03-20
Supplement: s1 [file s1]

Table Mutational spectra of different base combinations

| Before mutation | After mutation | NO. | Total |
|-----------------|----------------|-----|-------|
| AA              | TT             | 1   | 10    |
|                 | TG             | 4   |       |
|                 | CG             | 1   |       |
|                 | GG             | 4   |       |
| AT              | TC             | 1   | 7     |
|                 | CA             | 1   |       |
|                 | CG             | 1   |       |
|                 | GA             | 1   |       |
|                 | GC             | 3   |       |
| AC              | TT             | 3   | 11    |
|                 | CT             | 1   |       |
|                 | CG             | 1   |       |
|                 | GT             | 6   |       |
| AG              | TA             | 6   | 11    |
|                 | GA             | 5   |       |
| TA              | AT             | 1   | 11    |
|                 | AC             | 1   |       |
|                 | AG             | 4   |       |
|                 | CC             | 1   |       |
|                 | CG             | 4   |       |
| TT              | AC             | 1   | 5     |
|                 | CA             | 2   |       |
|                 | CC             | 1   |       |
|                 | CG             | 1   |       |
| TC              | AT             | 4   | 12    |
|                 | AG             | 1   |       |
|                 | CT             | 6   |       |
|                 | CG             | 1   |       |
| TG              | AA             | 4   | 12    |
|                 | CA             | 8   |       |
| CA              | AG             | 2   | 14    |
|                 | TT             | 4   |       |
|                 | TC             | 1   |       |
|                 | TG             | 7   |       |
|                 | TA             | 2   |       |
| CT              | TC             | 4   | 8     |
|                 | TG             | 2   |       |
|                 | AT             | 2   |       |
| CC              | TA             | 2   | 33    |
|                 | TT             | 2   |       |
|                 | TT             | 28  |       |

|    |    |    |    |
|----|----|----|----|
| CG | GT | 1  | 17 |
|    | AA | 1  |    |
|    | TA | 14 |    |
|    | TT | 1  |    |
| GA | GT | 1  | 12 |
|    | AT | 3  |    |
|    | AC | 1  |    |
|    | AG | 7  |    |
| GT | TG | 1  | 10 |
|    | AA | 7  |    |
|    | AC | 3  |    |
|    | AT | 1  |    |
| GC | AA | 1  | 28 |
|    | AT | 26 |    |
|    | TT | 1  |    |
|    | TA | 1  |    |
| GG | AA | 20 | 27 |
|    | AT | 1  |    |
|    | TA | 6  |    |
|    | GT | 1  |    |

Table Distribution of tandem mutations in mutants

| Times of mutation | Numbers of mutants | Mutants                                                                                                                                                            |
|-------------------|--------------------|--------------------------------------------------------------------------------------------------------------------------------------------------------------------|
| 0                 | 24                 | R02-1, R09, R02-2, R12, R22, R23, R33, R02-4, R49, R05-7, R05-11, R05-14, R03-1, R05-15, R03-2, R04-16, R02-12, R04-17, R04-19, R03-5, R03-7, R04-2, R03-9, R03-23 |
| 1                 | 21                 | R24, R25, R29, R37, R02-22, R05-1, R05-5, R05-9, R05-13, R02-8, R04-15, R03-4, R04-24, R02-14, R02-24, R04-4, R03-11, R03-12, R06-20, R03-21, R06-22               |
| 2                 | 14                 | R08, R14, R26, R35, R41, R42, R05-3, R02-6, R02-13, R03-3, R04-20, R04-1, R02-15, R02-19                                                                           |
| 3                 | 17                 | R02, R13, R15, R16, R02-17, R02-18, R31, R02-21, R04-13, R04-14, R04-18, R06-17, R04-23, R04-3, R02-10, R02-23, R06-23                                             |
| 4                 | 13                 | R05, R02-5, R05-4, R05-6, R02-7, R06-6, R04-21, R04-22, R02-11, R03-10, R02-3, R02-9, R06-24, R05-2, R06-18, R02-16                                                |
| 5                 | 3                  | R05-2, R06-18, R02-16                                                                                                                                              |
| 6                 | 4                  | R47, R48, R05-10, R03-8                                                                                                                                            |

|    |   |        |
|----|---|--------|
| 7  | 1 | R02-20 |
| 8  | 1 | R03-24 |
| 9  | 1 | R06-19 |
| 13 | 1 | R05-12 |

---
