# Supplementary material for: A Comprehensive Assessment of Ultraviolet-Radiation-Induced Mutations in Flammulina filiformis Using Whole-Genome Resequencing
Source: MDPI journal article supplement (doi:10.3390/jof10030228), 2024-03-20
Supplement: s1 [file s1]

Table Components for detection and gradient temperature PCR

| Components         | Volume (μL) |
|--------------------|-------------|
| 2×rTaq Mix         | 12.5        |
| ddH <sub>2</sub> O | 9.5         |
| Primer1            | 1           |
| Primer2            | 1           |
| Template           | 1           |

Table PCR components for product sequencing

| Components         | Volume (μL) |
|--------------------|-------------|
| 2×rTaq Mix         | 25          |
| ddH <sub>2</sub> O | 19          |
| Primer1            | 2           |
| Primer2            | 2           |
| Template           | 2           |

Table Deleted DNA fragments and their detection primers

| Amplified fragments | Length (bp) | T <sub>m</sub> (°C) | Extension time (s) | Primers (5'→3')                                      |
|---------------------|-------------|---------------------|--------------------|------------------------------------------------------|
| 84-1                | 1430        | 55                  | 95                 | F: CAAGACTTACGGATGGTGG<br>R: AGATTTCTGCTGACGAGGGA    |
| 42-3                | 517         | 51.3                | 54                 | F: TTGTGATGATTATTGGGCAGTT<br>R: CTATGTTGAGCCGTCGAACC |

Table PCR program for 84-1 fragment

| 94°C  | 34 cycles |      |      |       | 72°C |
|-------|-----------|------|------|-------|------|
|       | 94°C      | 55°C | 72°C |       |      |
| 300 s | 30 s      | 30 s | 90 s | 600 s |      |

Table PCR program for 42-3 fragment

| 94°C  | 34 cycles |      |      |       | 72°C |
|-------|-----------|------|------|-------|------|
|       | 94°C      | 52°C | 72°C |       |      |
| 300 s | 30 s      | 30 s | 35 s | 600 s |      |
