# Supplementary material for: A Comprehensive Assessment of Ultraviolet-Radiation-Induced Mutations in Flammulina filiformis Using Whole-Genome Resequencing
Source: MDPI journal article supplement (doi:10.3390/jof10030228), 2024-03-20
Supplement: s1 [file Supplementary Material S1.xlsx]

## Sheet: Sheet1
		Q20(%)	Q30(%)	GC(%)
R02	R02	96.49	91.71	47.37	2
R02-1	R02-1	96.18	90.87	49.56	4
R05	R05	96.7	92.13	48.34	5
R08	R08	96.44	91.59	49.41	8
R09	R09	96.72	92.15	50.2	9
R02-2	R02-2	96.22	90.99	49.07	11
R12	R12	96.74	92.17	49.58	12
R13	R13	95.85	90.58	46.34	13
R14	R14	96.47	91.68	48.66	14
R15	R15	96.4	91.55	48.73	15
R16	R16	96.97	92.67	50.22	16
R02-17	R02-17	96.89	92.21	49.87	19
R02-18	R02-18	96.29	91.1	48.86	20
R22	R22	96.47	91.67	49.19	22
R23	R23	95.68	90.31	43.63	23
R24	R24	96.55	91.83	48.27	24
R25	R25	96.04	90.9	48.04	25
R26	R26	95.87	90.62	48.17	26
R29	R29	95.55	90.1	42.62	29
R31	R31	95.98	90.78	49.47	31
R33	R33	95.87	90.59	47.64	33
R02-4	R02-4	96.17	90.85	48.93	34
R35	R35	96.42	91.6	48.66	35
R37	R37	96.62	91.94	48.59	37
R41	R41	96.17	91.11	49.18	41
R42	R42	96.5	91.73	49.61	42
R02-21	R02-21	96.41	91.27	49.74	44
R02-5	R02-5	95.63	89.92	48.19	45
R47	R47	96.6	92	49.93	47
R48	R48	96.42	91.6	49.33	48
R49	R49	96.07	90.96	47.71	49
R02-22	R02-22	96.87	92.22	49.46	50
R05-1	R05-1	95.85	90.34	49.43	52
R05-2	R05-2	95.62	89.9	49.34	53
R05-3	R05-3	95.14	89.16	43.33	56
R05-4	R05-4	95.27	89.29	47.99	59
R05-5	R05-5	95.02	88.82	51	60
R05-6	R05-6	95.29	89.32	49	61
R05-7	R05-7	95.41	89.52	50.11	62
R05-9	R05-9	95.66	89.92	49.26	65
R05-10	R05-10	95.34	89.41	45.18	68
R05-11	R05-11	95.55	89.73	48.45	69
R02-6	R02-6	96.19	90.99	45.46	70
R05-12	R05-12	96.57	91.74	44.02	72
R02-7	R02-7	95.95	90.51	48.19	74
R05-13	R05-13	96.48	91.48	49.1	75
R02-8	R02-8	96.08	90.72	48.5	76
R05-14	R05-14	96.36	91.23	50.18	77
R03-1	R03-1	95.49	89.49	50.09	78
R05-15	R05-15	95.78	90.15	49.22	79
R04-13	R04-13	95.74	90.04	49.91	80
R02-13	R02-13	96.07	90.7	50	82
R04-14	R04-14	95.69	90.01	45.81	83
R03-2	R03-2	95.79	90.04	49.54	84
R04-15	R04-15	96.01	90.53	47.59	85
R04-16	R04-16	96.01	90.48	49.48	86
R03-3	R03-3	96.09	90.53	49.85	90
R02-12	R02-12	96.07	90.71	47.47	91
R04-17	R04-17	95.82	90.14	49.93	92
R04-18	R04-18	96.36	91.12	50.17	93
R03-4	R03-4	95.55	89.59	50.13	95
R04-19	R04-19	96.52	91.48	48.72	96
R04-20	R04-20	96.8	92.05	48.98	97
R03-5	R03-5	96.3	91.04	48.88	102
R06-6	R06-6	95.09	88.71	43.43	103
R04-21	R04-21	96.52	91.48	48.43	104
R06-17	R06-17	95.44	89.25	45.89	105
R03-7	R03-7	95.76	90.04	48.68	106
R04-22	R04-22	96.38	91.26	48.7	107
R04-23	R04-23	96.06	90.65	47.72	112
R04-24	R04-24	96.55	91.54	49.64	113
R04-1	R04-1	96.13	90.77	49.66	115
R04-2	R04-2	95.99	90.61	49.22	119
R03-8	R03-8	96.24	90.9	49.77	120
R02-14	R02-14	96.23	90.98	49.6	121
R04-3	R04-3	95.86	90.26	49.73	123
R02-24	R02-24	96.89	92.21	49.13	124
R02-11	R02-11	96.27	91.07	48.07	125
R04-4	R04-4	95.68	90.01	46.42	126
R06-18	R06-18	95.71	89.74	46.06	128
R02-10	R02-10	96.56	91.61	50.01	129
R03-9	R03-9	95.34	89.36	46.45	130
R02-23	R02-23	96.64	91.81	47.64	132
R03-10	R03-10	95.78	90.08	48.79	137
R03-11	R03-11	95.47	89.64	42.95	138
R06-19	R06-19	95.43	89.15	49.34	143
R03-12	R03-12	95.87	90.28	48.26	144
R03-24	R03-24	96.46	91.41	46.9	145
R02-15	R02-15	95.96	90.5	47.43	147
R02-3	R02-3	96.03	90.59	49.55	148
R06-20	R06-20	95.38	89.22	43.42	148
R03-21	R03-21	96.13	90.73	47.04	149
R06-22	R06-22	95.52	89.43	48.74	150
R02-9	R02-9	96.64	91.76	49.15	151
R06-23	R06-23	95.58	89.46	49.15	152
R03-23	R03-23	95.84	90.24	46.59	153
R02-16	R02-16	96.41	91.28	49.61	154
R02-19	R02-19	96.65	91.75	48.59	155
R06-24	R06-24	95.51	89.4	46.79	156
R02-20	R02-20	96.38	91.26	49.44	157
R03-22	R03-22	96.44	91.38	46.46	WT583

## Sheet: Sheet3
strain ID	raw reads	clean reads	clean base	seq_depth	Q20(%)	Q30(%)	GC(%)
R02	14401118	14305580	4275514954	57.061	96.49	91.71	47.37
R05	15596755	15515864	4639996900	61.8885	96.7	92.13	48.34
R08	12976909	12871733	3844959242	51.3418	96.44	91.59	49.41
R09	22382917	21958459	6541397214	87.5863	96.72	92.15	50.2
R12	21045982	20788050	6201261062	82.9178	96.74	92.17	49.58
R13	20789904	20736871	6208063592	82.7137	95.85	90.58	46.34
R14	20782937	20670796	6181494316	82.4501	96.47	91.68	48.66
R15	19678209	19576410	5854014272	78.0849	96.4	91.55	48.73
R16	22468975	21863544	6487828578	87.2077	96.97	92.67	50.22
R22	19846820	19663357	5873516338	78.4317	96.47	91.67	49.19
R23	13681845	13636276	4081494540	54.3914	95.68	90.31	43.63
R24	19164088	19028548	5687763264	75.8996	96.55	91.83	48.27
R25	15197571	15019349	4490162924	59.9081	96.04	90.9	48.04
R26	13663043	13600634	4069072266	54.2492	95.87	90.62	48.17
R29	12884841	12822547	3837862622	51.1456	95.55	90.1	42.62
R31	18616873	18468197	5518993330	73.6646	95.98	90.78	49.47
R33	17107765	16966724	5072028648	67.6756	95.87	90.59	47.64
R35	19047132	18910155	5652025198	75.4274	96.42	91.6	48.66
R37	17375239	17101952	5104192550	68.215	96.62	91.94	48.59
R41	13967061	13853325	4142435038	55.2571	96.17	91.11	49.18
R42	17040550	16751952	4995788764	66.8189	96.5	91.73	49.61
R47	20199897	19594853	5831518028	78.1585	96.6	92	49.93
R48	17990780	17834866	5329848974	71.1384	96.42	91.6	49.33
R49	17322862	17194553	5140897884	68.5843	96.07	90.96	47.71
R02-1	13346671	13254983	3958765488	52.8705	96.18	90.87	49.56
R02-10	18237688	18013443	5366145756	71.8507	96.56	91.61	50.01
R02-11	12255235	12216901	3653843808	48.7299	96.27	91.07	48.07
R02-12	16648109	16616966	4973689898	66.2805	96.07	90.71	47.47
R02-13	15317504	15228070	4550947176	60.7406	96.07	90.7	50
R02-14	17489266	17417655	5207628412	69.4742	96.23	90.98	49.6
R02-15	14019688	13995179	4189992476	55.8229	95.96	90.5	47.43
R02-16	15049803	15004816	4488929638	59.8501	96.41	91.28	49.61
R02-17	17169985	17021296	5078161886	67.8933	96.89	92.21	49.87
R02-18	16348815	16304249	4878958312	65.0332	96.29	91.1	48.86
R02-19	21321707	21216766	6342791454	84.6278	96.65	91.75	48.59
R02-2	13969054	13905992	4157480028	55.4672	96.22	90.99	49.07
R02-20	17860725	17779594	5316601412	70.9179	96.38	91.26	49.44
R02-21	19209718	19153286	5731125358	76.3972	96.41	91.27	49.74
R02-22	24092590	24008823	7179993608	95.7646	96.87	92.22	49.46
R02-23	18959112	18903437	5654951382	75.4006	96.64	91.81	47.64
R02-24	21046347	20994886	6282202730	83.7428	96.89	92.21	49.13
R02-3	15706631	15615796	4668475824	62.2871	96.03	90.59	49.55
R02-4	18399723	18345798	5488992410	73.1763	96.17	90.85	48.93
R02-5	13389252	13356113	3997320304	53.2739	95.63	89.92	48.19
R02-6	17031000	16974321	5075904276	67.7059	96.19	90.99	45.46
R02-7	14126878	14069697	4206805254	56.1202	95.95	90.51	48.19
R02-8	17004738	16954496	5072994824	67.6268	96.08	90.72	48.5
R02-9	17035642	16943388	5061075492	67.5825	96.64	91.76	49.15
R03-1	13084345	13059186	3909724020	52.0895	95.49	89.49	50.09
R03-10	18761254	18689211	5586659972	74.5461	95.78	90.08	48.79
R03-11	15875449	15829781	4736164540	63.1406	95.47	89.64	42.95
R03-12	14872165	14833468	4437147894	59.1666	95.87	90.28	48.26
R03-2	13371979	13350146	3996960306	53.2501	95.79	90.04	49.54
R03-21	15687206	15654327	4683700378	62.4408	96.13	90.73	47.04
R03-22	17119519	17094846	5117046720	68.1866	96.44	91.38	46.46
R03-23	18580709	18549340	5552140768	73.9882	95.84	90.24	46.59
R03-24	18306247	18259641	5461692424	72.8327	96.46	91.41	46.9
R03-3	13958281	13912791	4161594550	55.4943	96.09	90.53	49.85
R03-4	17106900	17065850	5107455918	68.071	95.55	89.59	50.13
R03-5	11163568	11117722	3322404942	44.3455	96.3	91.04	48.88
R03-7	14340196	14301802	4278187124	57.046	95.76	90.04	48.68
R03-8	18896056	18809469	5620982626	75.0258	96.24	90.9	49.77
R03-9	13123237	13085290	3915461796	52.1936	95.34	89.36	46.45
R04-1	13358750	13292988	3972127340	53.0221	96.13	90.77	49.66
R04-13	15015525	14960062	4474335376	59.6716	95.74	90.04	49.91
R04-14	17208474	17178758	5142157690	68.5213	95.69	90.01	45.81
R04-15	17774857	17752806	5315578400	70.8111	96.01	90.53	47.59
R04-16	19439537	19416208	5814314222	77.4459	96.01	90.48	49.48
R04-17	15638748	15576462	4658414398	62.1302	95.82	90.14	49.93
R04-18	16167279	16120265	4822910078	64.2993	96.36	91.12	50.17
R04-19	22696050	22630038	6767918948	90.265	96.52	91.48	48.72
R04-2	15292582	15165874	4523629208	60.4925	95.99	90.61	49.22
R04-20	21177337	21137596	6322776352	84.3121	96.8	92.05	48.98
R04-21	17844310	17796138	5321623762	70.9839	96.52	91.48	48.43
R04-22	19652892	19602423	5865822858	78.1887	96.38	91.26	48.7
R04-23	15349118	15323679	4587239282	61.1219	96.06	90.65	47.72
R04-24	19973920	19890619	5946498418	79.3382	96.55	91.54	49.64
R04-3	13884632	13758849	4101661698	54.8803	95.86	90.26	49.73
R04-4	11572187	11511150	3439401872	45.9148	95.68	90.01	46.42
R05-1	13817692	13686541	4081045790	54.5919	95.85	90.34	49.43
R05-10	16911519	16858492	5042602786	67.2439	95.34	89.41	45.18
R05-11	15499746	15421528	4608006224	61.5122	95.55	89.73	48.45
R05-12	20761756	20714726	6194431658	82.6253	96.57	91.74	44.02
R05-13	19964967	19842190	5923363440	79.145	96.48	91.48	49.1
R05-14	10891557	10741041	3197609996	42.8431	96.36	91.23	50.18
R05-15	17589984	17503175	5231455438	69.8154	95.78	90.15	49.22
R05-2	13916937	13877972	4152268114	55.3554	95.62	89.9	49.34
R05-3	12237970	12194111	3647189598	48.639	95.14	89.16	43.33
R05-4	12832294	12792921	3826752584	51.0274	95.27	89.29	47.99
R05-5	11482737	11431838	3417402230	45.5985	95.02	88.82	51
R05-6	14583461	14535012	4347982704	57.9762	95.29	89.32	49
R05-7	9735079	9688658	2896537844	38.6454	95.41	89.52	50.11
R05-9	15094322	15032822	4494994480	59.9618	95.66	89.92	49.26
R06-17	16599005	16570374	4959264520	66.0947	95.44	89.25	45.89
R06-18	18637447	18597028	5563607914	74.1784	95.71	89.74	46.06
R06-19	18806421	18760500	5612263094	74.8305	95.43	89.15	49.34
R06-20	14872795	14854247	4447197524	59.2495	95.38	89.22	43.42
R06-22	17106272	17052516	5100578258	68.0178	95.52	89.43	48.74
R06-23	15724824	15692104	4695954534	62.5915	95.58	89.46	49.15
R06-24	11901046	11873068	3551986202	47.3584	95.51	89.4	46.79
R06-6	14323923	14287545	4275411476	56.9891	95.09	88.71	43.43
average	1.65134e+07	1.64234e+07	4.90968e+09	65.5085	96.0687	90.7267	48.3102
