# Supplementary material for: A Comprehensive Assessment of Ultraviolet-Radiation-Induced Mutations in Flammulina filiformis Using Whole-Genome Resequencing
Source: MDPI journal article supplement (doi:10.3390/jof10030228), 2024-03-20
Supplement: s1 [file Supplementary Material S4.xlsx]

## Sheet: Sheet1
mutation position	base before mutation	base after mutation	type of mutation	mutated gene	aa before mutation	aa after mutation
tig00000023_pilon_pilon_69027	C	T	non-CDS	g5075
tig00000122_pilon_pilon_1967979	G	A	non-CDS	g15942
tig00000122_pilon_pilon_1967993	C	T	non-CDS	g15942
tig00000117_pilon_pilon_420161	T	A	non-CDS	g13319
tig00000122_pilon_pilon_1967771	A	T	non-CDS	g15942
tig00000122_pilon_pilon_1967772	C	T	non-CDS	g15942
tig00000122_pilon_pilon_37037	C	G	non-synonymous	g15076	L	V
tig00000117_pilon_pilon_424892	A	G	synonymous	g13319	L	L
tig00000105_pilon_pilon_2120685	A	T	non-CDS	g11418
tig00000105_pilon_pilon_2120686	T	A	non-CDS	g11418
tig00000107_pilon_pilon_935043	T	C	non-synonymous	g12125	M	T
tig00000107_pilon_pilon_1416552	A	G	promoter	g12307
tig00000121_pilon_pilon_565040	A	G	synonymous	g14013	E	E
tig00000001_pilon_pilon_1502125	G	A	synonymous	g649	P	P
tig00000001_pilon_pilon_1502126	G	A	non-synonymous	g649	P	L
tig00000035_pilon_pilon_1405162	C	T	promoter	g7595
tig00000105_pilon_pilon_703271	A	T	non-synonymous	g10791	N	I
tig00000122_pilon_pilon_2206280	T	A	non-synonymous	g16048	Y	F
tig00000122_pilon_pilon_2206282	C	A	non-synonymous	g16048	Q	H
tig00000044_pilon_pilon_404461	A	G	non-CDS	g8582
tig00000035_pilon_pilon_1170841	C	T	non-synonymous	g7510	S	F
tig00000105_pilon_pilon_782773	G	T	non-synonymous	g10821	S	I
tig00000107_pilon_pilon_1442010	A	G	promoter	g12318
tig00000107_pilon_pilon_1442011	T	C	promoter	g12318
tig00000001_pilon_pilon_601927	G	A	synonymous	g239	E	E
tig00000011_pilon_pilon_1807185	A	T	promoter	g2738
tig00000011_pilon_pilon_836621	G	T	non-synonymous	g2313	F	L
tig00000054_pilon_pilon_338892	C	T	non-synonymous	g10495	P	L
tig00000023_pilon_pilon_2583516	C	A	non-synonymous	g6200	P	T
tig00000023_pilon_pilon_2583517	C	T	non-synonymous	g6200	P	L
tig00000035_pilon_pilon_1759922	A	T	non-synonymous	g7749	N	I
tig00000035_pilon_pilon_1673841	G	A	non-synonymous	g7709	P	L
tig00000035_pilon_pilon_1673842	G	A	non-synonymous	g7709	P	S
tig00000001_pilon_pilon_947291	A	T	non-synonymous	g392	I	K
tig00000107_pilon_pilon_868713	G	A	synonymous	g12095	L	L
tig00000118_pilon_pilon_39463	T	A	non-synonymous	g13686	D	E
tig00000044_pilon_pilon_2268971	C	T	non-CDS	g9383
tig00000121_pilon_pilon_568710	T	C	synonymous	g14013	F	F
tig00000023_pilon_pilon_289963	G	A	non-synonymous	g5171	G	E
tig00000035_pilon_pilon_2139001	G	A	non-synonymous	g7932	L	F
tig00000044_pilon_pilon_2119204	C	G	synonymous	g9322	A	A
tig00000122_pilon_pilon_709068	A	C	non-synonymous	g15358	K	N
tig00000020_pilon_pilon_636091	C	T	non-synonymous	g3941	S	F
tig00000011_pilon_pilon_3404722	A	T	non-CDS	g3498
tig00000001_pilon_pilon_4001629	C	T	non-CDS	g1745
tig00000023_pilon_pilon_3488732	A	G	synonymous	g6600	S	S
tig00000044_pilon_pilon_363691	T	A	non-CDS	g8560
tig00000107_pilon_pilon_337412	G	A	non-CDS	g11852
tig00000122_pilon_pilon_459041	T	C	promoter	g15249
tig00000011_pilon_pilon_890702	T	G	synonymous	g2334	V	V
tig00000011_pilon_pilon_890703	G	C	non-synonymous	g2334	D	H
tig00000001_pilon_pilon_600792	C	T	non-CDS	g239
tig00000001_pilon_pilon_2015625	T	A	non-synonymous	g882	K	*
tig00000023_pilon_pilon_2015164	C	T	promoter	g5939
tig00000011_pilon_pilon_362469	G	A	synonymous	g2111	I	I
tig00000020_pilon_pilon_1408015	G	A	non-CDS	g4316
tig00000035_pilon_pilon_1017776	A	G	non-CDS	g7442
tig00000117_pilon_pilon_1072745	C	T	non-synonymous	g13614	G	E
tig00000122_pilon_pilon_797302	C	T	non-synonymous	g15401	S	L
tig00000011_pilon_pilon_1414698	C	T	promoter	g2556
tig00000020_pilon_pilon_384886	G	A	synonymous	g3824	I	I
tig00000023_pilon_pilon_2398014	T	A	non-synonymous	g6111	T	S
tig00000030_pilon_pilon_238063	C	T	non-synonymous	g6919	G	R
tig00000044_pilon_pilon_1183609	C	T	non-synonymous	g8919	E	K
tig00000001_pilon_pilon_772173	T	C	non-CDS	g319
tig00000117_pilon_pilon_328254	G	A	non-CDS	g13273
tig00000117_pilon_pilon_328255	T	A	non-CDS	g13273
tig00000001_pilon_pilon_4127565	G	A	non-synonymous	g1809	L	F
tig00000023_pilon_pilon_1147546	G	A	non-synonymous	g5569	P	L
tig00000011_pilon_pilon_3404970	G	A	non-synonymous	g3498	P	S
tig00000001_pilon_pilon_1376909	G	A	non-synonymous	g583	E	K
tig00000035_pilon_pilon_93145	C	T	synonymous	g7044	S	S
tig00000001_pilon_pilon_1432513	G	A	synonymous	g613	L	L
tig00000035_pilon_pilon_658296	G	A	synonymous	g7284	V	V
tig00000122_pilon_pilon_2710496	C	T	non-synonymous	g16270	S	L
tig00000011_pilon_pilon_1248646	A	C	promoter	g2490
tig00000011_pilon_pilon_1248648	A	C	promoter	g2490
tig00000011_pilon_pilon_1248651	A	T	promoter	g2490
tig00000001_pilon_pilon_4127240	T	G	synonymous	g1809	V	V
tig00000011_pilon_pilon_473143	T	A	non-CDS	g2164
tig00000023_pilon_pilon_1291423	C	T	synonymous	g5633	S	S
tig00000023_pilon_pilon_1291425	T	C	non-synonymous	g5633	L	S
tig00000046_pilon_pilon_1655797	G	A	non-synonymous	g10138	P	L
tig00000011_pilon_pilon_1500731	A	G	promoter	g2592
tig00000001_pilon_pilon_1005608	G	A	promoter	g417
tig00000107_pilon_pilon_173292	G	A	non-synonymous	g11775	L	F
tig00000011_pilon_pilon_2794571	C	A	non-synonymous	g3204	W	L
tig00000011_pilon_pilon_2982752	C	T	synonymous	g3301	T	T
tig00000041_pilon_pilon_484586	C	T	non-CDS	g8324
tig00000121_pilon_pilon_2450531	T	G	non-CDS	g14793
tig00000122_pilon_pilon_1076885	C	T	non-synonymous	g15528	P	S
tig00000001_pilon_pilon_601531	A	T	non-synonymous	g239	I	L
tig00000011_pilon_pilon_2097305	G	T	promoter	g2881
tig00000107_pilon_pilon_1013071	G	A	promoter	g12158
tig00000044_pilon_pilon_403303	C	T	synonymous	g8582	F	F
tig00000035_pilon_pilon_1106696	C	T	synonymous	g7483	I	I
tig00000107_pilon_pilon_846395	A	T	non-CDS	g12084
tig00000107_pilon_pilon_846396	C	T	non-CDS	g12084
tig00000113_pilon_pilon_8132	C	T	non-synonymous	g12928	P	S
tig00000044_pilon_pilon_1809901	A	G	promoter	g9183
tig00000023_pilon_pilon_2676832	T	C	non-synonymous	g6247	I	M
tig00000023_pilon_pilon_2691276	C	T	non-synonymous	g6254	P	S
tig00000023_pilon_pilon_2692061	C	A	non-CDS	g6254
tig00000023_pilon_pilon_2692062	C	T	non-CDS	g6254
tig00000117_pilon_pilon_1072872	G	A	synonymous	g13614	L	L
tig00000054_pilon_pilon_129780	C	T	non-synonymous	g10397	E	K
tig00000113_pilon_pilon_315503	C	T	non-CDS	g13057
tig00000121_pilon_pilon_1275591	A	C	promoter	g14332
tig00000023_pilon_pilon_432764	G	A	synonymous	g5250	A	A
tig00000117_pilon_pilon_396491	T	G	promoter	g13302
tig00000124_pilon_pilon_33672	C	T	non-synonymous	g16294	L	F
tig00000001_pilon_pilon_3458915	T	C	promoter	g1511
tig00000023_pilon_pilon_260957	C	T	non-synonymous	g5157	V	M
tig00000020_pilon_pilon_169515	G	A	non-CDS	g3727
tig00000035_pilon_pilon_1017193	G	A	non-CDS	g7442
tig00000044_pilon_pilon_1191363	A	T	non-synonymous	g8924	V	D
tig00000054_pilon_pilon_339565	C	T	non-synonymous	g10495	P	S
tig00000105_pilon_pilon_508567	C	T	synonymous	g10703	D	D
tig00000121_pilon_pilon_2035074	A	T	non-synonymous	g14634	I	F
tig00000121_pilon_pilon_2035100	T	A	synonymous	g14634	G	G
tig00000011_pilon_pilon_2400531	T	A	promoter	g3024
tig00000118_pilon_pilon_219885	C	T	non-CDS	g13756
tig00000122_pilon_pilon_2723933	G	A	non-synonymous	g16274	M	I
tig00000011_pilon_pilon_834339	A	G	synonymous	g2313	L	L
tig00000035_pilon_pilon_471338	T	C	non-CDS	g7203
tig00000035_pilon_pilon_471372	A	T	non-synonymous	g7203	D	E
tig00000001_pilon_pilon_1954068	T	C	non-CDS	g850
tig00000121_pilon_pilon_2035036	C	T	non-synonymous	g14634	A	V
tig00000011_pilon_pilon_2890686	A	G	non-synonymous	g3250	K	E
tig00000122_pilon_pilon_594123	A	C	non-synonymous	g15305	L	F
tig00000011_pilon_pilon_835509	G	A	synonymous	g2313	V	V
tig00000105_pilon_pilon_1080502	G	A	synonymous	g10960	L	L
tig00000107_pilon_pilon_1387345	T	A	non-synonymous	g12293	N	K
tig00000124_pilon_pilon_39883	C	T	non-synonymous	g16296	W	*
tig00000011_pilon_pilon_1300375	T	A	non-synonymous	g2509	L	*
tig00000020_pilon_pilon_2402606	C	T	non-synonymous	g4792	G	E
tig00000054_pilon_pilon_127749	A	T	synonymous	g10397	G	G
tig00000122_pilon_pilon_1738604	G	T	non-synonymous	g15837	F	L
tig00000044_pilon_pilon_164712	C	T	non-synonymous	g8475	H	Y
tig00000011_pilon_pilon_3294053	C	T	non-synonymous	g3442	G	R
tig00000001_pilon_pilon_771699	A	G	non-synonymous	g319	Q	R
tig00000001_pilon_pilon_771740	A	G	non-CDS	g319
tig00000023_pilon_pilon_2345638	G	A	non-synonymous	g6087	T	I
tig00000023_pilon_pilon_2581869	C	A	non-synonymous	g6200	L	I
tig00000105_pilon_pilon_2119841	T	C	non-synonymous	g11418	L	P
tig00000107_pilon_pilon_213397	G	A	non-synonymous	g11794	S	F
tig00000121_pilon_pilon_1758688	C	T	promoter	g14528
tig00000122_pilon_pilon_2118432	T	A	promoter	g16014
tig00000011_pilon_pilon_3294299	C	T	non-CDS	g3442
tig00000107_pilon_pilon_558603	C	T	non-synonymous	g11950	G	S
tig00000105_pilon_pilon_269797	G	T	promoter	g10604
tig00000035_pilon_pilon_723082	T	C	non-synonymous	g7307	S	P
tig00000001_pilon_pilon_147035	A	G	non-synonymous	g50	E	G
tig00000001_pilon_pilon_1694798	G	A	non-synonymous	g742	L	F
tig00000001_pilon_pilon_1954831	T	C	non-CDS	g851
tig00000001_pilon_pilon_2550270	G	A	synonymous	g1112	I	I
tig00000001_pilon_pilon_3304381	C	T	non-synonymous	g1438	P	L
tig00000011_pilon_pilon_356020	G	A	intergenic-region
tig00000011_pilon_pilon_526184	G	A	non-synonymous	g2186	S	F
tig00000011_pilon_pilon_526186	G	A	synonymous	g2186	D	D
tig00000011_pilon_pilon_604954	C	T	intergenic-region
tig00000011_pilon_pilon_2154372	A	G	non-synonymous	g2913	Q	R
tig00000011_pilon_pilon_2265578	A	G	promoter	g2963
tig00000011_pilon_pilon_2349228	G	A	synonymous	g3000	I	I
tig00000011_pilon_pilon_2599459	G	A	non-synonymous	g3121	T	I
tig00000011_pilon_pilon_2637118	G	C	synonymous	g3136	A	A
tig00000011_pilon_pilon_2637119	G	T	non-synonymous	g3136	A	D
tig00000011_pilon_pilon_2720734	T	C	non-synonymous	g3174	F	L
tig00000011_pilon_pilon_3212997	G	A	non-synonymous	g3411	S	L
tig00000011_pilon_pilon_3241427	G	A	intergenic-region
tig00000020_pilon_pilon_71995	A	T	non-synonymous	g3671	K	*
tig00000020_pilon_pilon_1228187	A	G	non-CDS	g4232
tig00000020_pilon_pilon_1245596	A	G	synonymous	g4241	I	I
tig00000020_pilon_pilon_1245598	T	A	non-synonymous	g4241	I	F
tig00000020_pilon_pilon_1794437	A	G	promoter	g4504
tig00000020_pilon_pilon_2061081	C	A	intergenic-region
tig00000020_pilon_pilon_2256039	G	A	non-CDS	g4729
tig00000020_pilon_pilon_2364389	T	C	non-synonymous	g4773	I	M
tig00000020_pilon_pilon_2389431	A	G	non-CDS	g4786
tig00000023_pilon_pilon_358776	C	T	intergenic-region
tig00000023_pilon_pilon_644586	C	T	non-CDS	g5351
tig00000023_pilon_pilon_2393522	C	T	intergenic-region
tig00000023_pilon_pilon_2571271	G	C	non-synonymous	g6194	S	*
tig00000023_pilon_pilon_3254472	G	A	non-synonymous	g6497	S	L
tig00000023_pilon_pilon_3402389	T	C	synonymous	g6565	L	L
tig00000023_pilon_pilon_3630310	T	C	promoter	g6663
tig00000030_pilon_pilon_224019	T	C	intergenic-region
tig00000030_pilon_pilon_302672	G	T	non-synonymous	g6945	R	L
tig00000030_pilon_pilon_374601	A	T	intergenic-region
tig00000035_pilon_pilon_48430	C	T	non-CDS	g7027
tig00000035_pilon_pilon_530186	A	G	non-synonymous	g7225	L	P
tig00000035_pilon_pilon_768941	G	A	non-synonymous	g7327	W	*
tig00000035_pilon_pilon_768942	G	A	non-synonymous	g7327	W	*
tig00000035_pilon_pilon_943781	G	A	non-CDS	g7411
tig00000035_pilon_pilon_2340599	C	T	intergenic-region
tig00000044_pilon_pilon_799674	C	T	non-synonymous	g8749	S	L
tig00000044_pilon_pilon_1199256	A	G	promoter	g8929
tig00000046_pilon_pilon_547456	A	T	non-synonymous	g9672	Y	N
tig00000046_pilon_pilon_1565431	G	A	synonymous	g10097	I	I
tig00000046_pilon_pilon_1729476	C	G	non-synonymous	g10171	A	P
tig00000052_pilon_pilon_4796	C	T	intergenic-region
tig00000107_pilon_pilon_616428	C	T	non-CDS	g11976
tig00000107_pilon_pilon_659668	A	C	intergenic-region
tig00000107_pilon_pilon_1017119	A	G	intergenic-region
tig00000107_pilon_pilon_1779341	T	C	synonymous	g12477	L	L
tig00000113_pilon_pilon_318178	A	G	intergenic-region
tig00000117_pilon_pilon_110321	C	T	non-synonymous	g13177	R	C
tig00000117_pilon_pilon_395831	G	A	non-CDS	g13302
tig00000118_pilon_pilon_5906	C	T	synonymous	g13670	D	D
tig00000121_pilon_pilon_1572137	G	T	intergenic-region
tig00000122_pilon_pilon_846021	C	T	non-CDS	g15423
tig00000122_pilon_pilon_1381477	A	C	promoter	g15673
tig00000122_pilon_pilon_1758332	A	G	promoter	g15848
tig00000122_pilon_pilon_2086755	A	C	promoter	g15998
tig00000122_pilon_pilon_2280547	A	G	non-CDS	g16082
tig00000122_pilon_pilon_2719421	A	G	intergenic-region
tig00000001_pilon_pilon_686644	A	G	non-synonymous	g278	S	G
tig00000001_pilon_pilon_884394	A	G	non-synonymous	g368	M	T
tig00000001_pilon_pilon_1203250	G	A	non-CDS	g504
tig00000001_pilon_pilon_1920268	G	T	non-synonymous	g835	Q	H
tig00000001_pilon_pilon_2628272	G	A	non-CDS	g1150
tig00000001_pilon_pilon_3631660	G	A	non-CDS	g1581
tig00000020_pilon_pilon_349465	C	T	non-synonymous	g3810	G	S
tig00000020_pilon_pilon_525172	G	T	non-CDS	g3894
tig00000020_pilon_pilon_1192368	G	A	non-synonymous	g4211	P	S
tig00000023_pilon_pilon_485372	A	G	non-CDS	g5279
tig00000023_pilon_pilon_1039044	C	T	non-CDS	g5524
tig00000023_pilon_pilon_1435628	A	G	intergenic-region
tig00000023_pilon_pilon_1441759	A	G	synonymous	g5694	L	L
tig00000023_pilon_pilon_1546163	G	A	non-synonymous	g5743	T	M
tig00000023_pilon_pilon_2566467	G	A	non-CDS	g6192
tig00000023_pilon_pilon_2711541	C	T	intergenic-region
tig00000023_pilon_pilon_2865003	A	G	non-synonymous	g6326	K	R
tig00000035_pilon_pilon_39833	C	T	synonymous	g7024	Y	Y
tig00000035_pilon_pilon_437318	C	T	non-synonymous	g7187	P	L
tig00000035_pilon_pilon_617226	C	T	non-synonymous	g7264	P	S
tig00000035_pilon_pilon_670083	A	T	synonymous	g7289	G	G
tig00000046_pilon_pilon_197395	T	G	non-synonymous	g9534	L	R
tig00000046_pilon_pilon_375012	C	T	intergenic-region
tig00000046_pilon_pilon_392953	G	A	non-CDS	g9605
tig00000046_pilon_pilon_864373	T	A	non-synonymous	g9802	M	K
tig00000046_pilon_pilon_1204318	C	T	non-synonymous	g9945	E	K
tig00000054_pilon_pilon_113913	G	C	non-synonymous	g10390	F	L
tig00000105_pilon_pilon_1409016	T	C	intergenic-region
tig00000105_pilon_pilon_1853645	T	C	non-CDS	g11309
tig00000107_pilon_pilon_384989	T	C	intergenic-region
tig00000107_pilon_pilon_464153	C	T	non-synonymous	g11912	R	Q
tig00000117_pilon_pilon_1099095	C	T	intergenic-region
tig00000118_pilon_pilon_37505	C	T	non-synonymous	g13684	P	L
tig00000121_pilon_pilon_228077	C	T	intergenic-region
tig00000122_pilon_pilon_2627753	C	T	promoter	g16221
tig00000001_pilon_pilon_398062	C	T	intergenic-region
tig00000001_pilon_pilon_4031333	T	C	non-synonymous	g1760	K	E
tig00000011_pilon_pilon_2480907	G	A	non-synonymous	g3064	P	S
tig00000011_pilon_pilon_2480936	G	T	non-synonymous	g3064	P	H
tig00000011_pilon_pilon_2480937	G	A	non-synonymous	g3064	P	S
tig00000011_pilon_pilon_3300405	C	T	non-CDS	g3446
tig00000020_pilon_pilon_2023466	G	A	non-CDS	g4616
tig00000020_pilon_pilon_2193819	T	C	non-CDS	g4697
tig00000020_pilon_pilon_2470580	A	T	non-synonymous	g4829	V	D
tig00000023_pilon_pilon_529259	G	A	synonymous	g5300	Q	Q
tig00000023_pilon_pilon_709175	C	T	non-synonymous	g5377	G	D
tig00000023_pilon_pilon_1201978	C	T	non-synonymous	g5595	S	L
tig00000023_pilon_pilon_2332280	A	T	non-CDS	g6080
tig00000023_pilon_pilon_2332281	G	A	non-CDS	g6080
tig00000023_pilon_pilon_3505474	G	A	non-CDS	g6607
tig00000030_pilon_pilon_48652	G	A	intergenic-region
tig00000035_pilon_pilon_35308	G	A	non-synonymous	g7022	S	F
tig00000035_pilon_pilon_1482874	G	A	non-synonymous	g7633	L	F
tig00000035_pilon_pilon_1749456	A	T	non-CDS	g7745
tig00000035_pilon_pilon_2088211	C	T	non-synonymous	g7905	S	F
tig00000035_pilon_pilon_2224886	C	T	non-synonymous	g7973	P	L
tig00000035_pilon_pilon_2261202	T	A	non-CDS	g7989
tig00000035_pilon_pilon_2369806	A	T	non-CDS	g8034
tig00000044_pilon_pilon_182988	A	G	non-CDS	g8484
tig00000044_pilon_pilon_505815	C	T	non-synonymous	g8624	S	F
tig00000044_pilon_pilon_1083341	G	A	synonymous	g8869	I	I
tig00000044_pilon_pilon_1975996	T	A	non-synonymous	g9261	Y	F
tig00000054_pilon_pilon_137042	G	C	non-CDS	g10401
tig00000105_pilon_pilon_1255976	C	T	non-synonymous	g11042	S	L
tig00000105_pilon_pilon_1579155	T	C	promoter	g11184
tig00000105_pilon_pilon_1764960	C	A	synonymous	g11269	L	L
tig00000105_pilon_pilon_2379575	G	A	synonymous	g11531	F	F
tig00000107_pilon_pilon_738264	G	A	non-synonymous	g12037	E	K
tig00000117_pilon_pilon_1003301	C	T	non-synonymous	g13590	P	S
tig00000117_pilon_pilon_1003302	C	T	non-synonymous	g13590	P	L
tig00000121_pilon_pilon_1325627	C	T	non-synonymous	g14354	A	V
tig00000121_pilon_pilon_1348939	G	A	non-synonymous	g14365	S	F
tig00000001_pilon_pilon_152096	T	C	non-synonymous	g54	R	G
tig00000001_pilon_pilon_2171806	T	G	promoter	g952
tig00000020_pilon_pilon_270463	T	C	non-CDS	g3775
tig00000020_pilon_pilon_2892062	C	T	intergenic-region
tig00000023_pilon_pilon_1687578	G	A	synonymous	g5801	G	G
tig00000030_pilon_pilon_213416	C	A	intergenic-region
tig00000035_pilon_pilon_1202606	C	T	non-synonymous	g7522	P	L
tig00000035_pilon_pilon_1751107	C	T	non-synonymous	g7746	D	N
tig00000035_pilon_pilon_2310471	T	G	non-synonymous	g8010	Y	D
tig00000041_pilon_pilon_184489	A	C	non-CDS	g8204
tig00000041_pilon_pilon_184490	T	C	non-CDS	g8204
tig00000041_pilon_pilon_280539	A	T	non-CDS	g8241
tig00000044_pilon_pilon_216270	T	G	synonymous	g8506	T	T
tig00000046_pilon_pilon_812984	C	T	non-synonymous	g9775	P	S
tig00000105_pilon_pilon_351149	G	A	synonymous	g10637	P	P
tig00000105_pilon_pilon_1663838	C	T	non-CDS	g11219
tig00000107_pilon_pilon_430570	G	A	non-CDS	g11895
tig00000107_pilon_pilon_430572	G	A	non-CDS	g11895
tig00000107_pilon_pilon_1200762	G	A	non-CDS	g12223
tig00000107_pilon_pilon_1200763	G	A	non-CDS	g12223
tig00000107_pilon_pilon_2024490	G	A	synonymous	g12569	F	F
tig00000117_pilon_pilon_225394	A	T	promoter	g13226
tig00000001_pilon_pilon_838566	C	T	intergenic-region
tig00000023_pilon_pilon_3147494	C	T	synonymous	g6456	A	A
tig00000023_pilon_pilon_3706347	C	T	intergenic-region
tig00000035_pilon_pilon_337435	C	T	non-CDS	g7144
tig00000044_pilon_pilon_306727	G	T	promoter	g8540
tig00000046_pilon_pilon_1841284	A	G	intergenic-region
tig00000048_pilon_pilon_97569	G	C	intergenic-region
tig00000001_pilon_pilon_610368	C	T	synonymous	g243	K	K
tig00000020_pilon_pilon_799239	G	A	non-synonymous	g4023	Q	*
tig00000023_pilon_pilon_3534256	A	G	intergenic-region
tig00000035_pilon_pilon_154793	C	T	non-synonymous	g7073	P	S
tig00000035_pilon_pilon_695904	T	A	non-synonymous	g7295	N	Y
tig00000041_pilon_pilon_155254	C	T	synonymous	g8195	L	L
tig00000046_pilon_pilon_1708443	A	C	intergenic-region
tig00000105_pilon_pilon_1663714	A	T	non-CDS	g11219
tig00000107_pilon_pilon_652664	G	A	non-synonymous	g11996	S	F
tig00000107_pilon_pilon_832304	G	A	synonymous	g12079	I	I
tig00000107_pilon_pilon_1638439	T	A	non-synonymous	g12425	I	L
tig00000117_pilon_pilon_182863	G	A	non-synonymous	g13209	G	R
tig00000121_pilon_pilon_1555969	G	A	non-synonymous	g14444	P	S
tig00000122_pilon_pilon_11493	G	A	synonymous	g15064	F	F
tig00000122_pilon_pilon_204926	G	A	synonymous	g15129	L	L
tig00000122_pilon_pilon_924667	C	T	non-synonymous	g15455	S	N
tig00000001_pilon_pilon_670457	C	T	promoter	g269
tig00000001_pilon_pilon_2338741	A	G	synonymous	g1030	Q	Q
tig00000011_pilon_pilon_764008	C	T	promoter	g2283
tig00000011_pilon_pilon_764009	T	C	promoter	g2283
tig00000020_pilon_pilon_549634	G	A	non-CDS	g3905
tig00000020_pilon_pilon_1944459	A	G	synonymous	g4576	L	L
tig00000023_pilon_pilon_1064395	A	G	intergenic-region
tig00000023_pilon_pilon_2319645	C	T	non-CDS	g6075
tig00000023_pilon_pilon_3342073	G	T	synonymous	g6539	L	L
tig00000030_pilon_pilon_68361	G	A	intergenic-region
tig00000035_pilon_pilon_1432789	T	G	non-CDS	g7607
tig00000035_pilon_pilon_2009514	T	C	non-synonymous	g7869	F	S
tig00000041_pilon_pilon_454120	T	C	intergenic-region
tig00000046_pilon_pilon_1625600	G	A	non-synonymous	g10125	R	C
tig00000046_pilon_pilon_1625601	T	C	synonymous	g10125	Q	Q
tig00000107_pilon_pilon_612994	T	A	intergenic-region
tig00000107_pilon_pilon_752711	A	C	non-synonymous	g12045	Y	S
tig00000107_pilon_pilon_1019525	G	A	intergenic-region
tig00000113_pilon_pilon_321464	C	T	non-synonymous	g13060	P	S
tig00000117_pilon_pilon_438325	A	G	non-CDS	g13322
tig00000001_pilon_pilon_42846	T	C	non-synonymous	g16	S	P
tig00000001_pilon_pilon_136462	A	G	intergenic-region
tig00000001_pilon_pilon_3948904	G	A	synonymous	g1720	F	F
tig00000011_pilon_pilon_765149	A	C	intergenic-region
tig00000011_pilon_pilon_2815048	C	A	synonymous	g3212	I	I
tig00000011_pilon_pilon_2816835	T	A	non-CDS	g3213
tig00000020_pilon_pilon_1326343	G	A	non-synonymous	g4281	S	N
tig00000020_pilon_pilon_1953060	G	A	non-synonymous	g4580	G	R
tig00000020_pilon_pilon_2249027	G	A	synonymous	g4724	S	S
tig00000020_pilon_pilon_2249028	G	A	non-synonymous	g4724	S	F
tig00000023_pilon_pilon_357756	C	T	non-CDS	g5208
tig00000023_pilon_pilon_1134031	G	T	non-synonymous	g5564	G	V
tig00000023_pilon_pilon_1468404	A	T	non-synonymous	g5706	*	L
tig00000023_pilon_pilon_1468405	G	A	synonymous	g5706	*	*
tig00000023_pilon_pilon_1468761	G	T	non-synonymous	g5707	D	Y
tig00000023_pilon_pilon_1562346	G	A	intergenic-region
tig00000030_pilon_pilon_131069	G	T	non-synonymous	g6869	P	T
tig00000035_pilon_pilon_1773799	G	A	non-synonymous	g7757	L	F
tig00000035_pilon_pilon_1777509	C	T	non-synonymous	g7759	S	F
tig00000035_pilon_pilon_1829760	C	T	synonymous	g7785	S	S
tig00000041_pilon_pilon_632582	A	T	intergenic-region
tig00000044_pilon_pilon_869034	T	A	non-CDS	g8779
tig00000044_pilon_pilon_1138108	G	A	synonymous	g8898	E	E
tig00000054_pilon_pilon_318230	G	A	non-synonymous	g10485	G	R
tig00000054_pilon_pilon_354229	C	A	non-synonymous	g10503	Q	K
tig00000105_pilon_pilon_639134	G	A	intergenic-region
tig00000105_pilon_pilon_1858164	A	G	synonymous	g11311	V	V
tig00000105_pilon_pilon_2394916	C	T	non-synonymous	g11538	S	F
tig00000107_pilon_pilon_117829	G	A	non-synonymous	g11743	D	N
tig00000117_pilon_pilon_912562	G	A	intergenic-region
tig00000121_pilon_pilon_1876819	C	T	non-CDS	g14574
tig00000122_pilon_pilon_365541	T	A	intergenic-region
tig00000122_pilon_pilon_1896920	G	A	synonymous	g15909	*	*
tig00000122_pilon_pilon_2396166	C	T	intergenic-region
tig00000001_pilon_pilon_190190	C	T	promoter	g71
tig00000001_pilon_pilon_2417375	G	A	intergenic-region
tig00000001_pilon_pilon_2940738	G	A	non-synonymous	g1284	L	F
tig00000001_pilon_pilon_2940739	G	T	synonymous	g1284	G	G
tig00000011_pilon_pilon_414784	C	T	intergenic-region
tig00000011_pilon_pilon_1173773	C	T	non-synonymous	g2454	E	K
tig00000011_pilon_pilon_3144904	C	T	non-synonymous	g3374	P	S
tig00000020_pilon_pilon_293498	C	T	promoter	g3783
tig00000020_pilon_pilon_1435952	C	T	non-synonymous	g4328	P	L
tig00000020_pilon_pilon_1995733	G	A	non-CDS	g4600
tig00000020_pilon_pilon_2032926	C	T	non-CDS	g4620
tig00000020_pilon_pilon_2032927	C	T	non-CDS	g4620
tig00000023_pilon_pilon_1712784	G	A	non-CDS	g5811
tig00000023_pilon_pilon_1765570	G	A	synonymous	g5835	F	F
tig00000023_pilon_pilon_2121988	C	T	promoter	g5985
tig00000023_pilon_pilon_2922544	T	C	non-synonymous	g6354	D	G
tig00000023_pilon_pilon_3551710	C	T	intergenic-region
tig00000023_pilon_pilon_3562933	G	A	non-synonymous	g6632	V	I
tig00000030_pilon_pilon_264833	T	A	non-CDS	g6930
tig00000041_pilon_pilon_230163	C	A	promoter	g8222
tig00000044_pilon_pilon_180446	C	T	non-synonymous	g8483	D	N
tig00000044_pilon_pilon_1299221	G	A	intergenic-region
tig00000044_pilon_pilon_2054516	A	G	non-synonymous	g9295	Y	H
tig00000046_pilon_pilon_204802	C	T	promoter	g9536
tig00000105_pilon_pilon_755169	T	G	non-synonymous	g10811	F	V
tig00000105_pilon_pilon_755170	T	C	non-synonymous	g10811	F	S
tig00000105_pilon_pilon_1622207	A	G	intergenic-region
tig00000105_pilon_pilon_1847930	C	T	promoter	g11307
tig00000118_pilon_pilon_224635	T	A	intergenic-region
tig00000122_pilon_pilon_1383606	C	A	non-synonymous	g15674	S	*
tig00000001_pilon_pilon_1002195	T	C	non-synonymous	g415	L	P
tig00000001_pilon_pilon_1018599	C	T	intergenic-region
tig00000001_pilon_pilon_1018600	C	T	intergenic-region
tig00000001_pilon_pilon_1251486	G	A	non-synonymous	g527	Q	*
tig00000001_pilon_pilon_1510266	G	A	synonymous	g655	L	L
tig00000001_pilon_pilon_2042069	G	T	non-synonymous	g892	T	N
tig00000001_pilon_pilon_2055135	C	T	synonymous	g896	I	I
tig00000011_pilon_pilon_1807363	C	T	non-synonymous	g2739	P	S
tig00000011_pilon_pilon_2132873	G	A	non-CDS	g2901
tig00000011_pilon_pilon_2132874	T	A	non-CDS	g2901
tig00000011_pilon_pilon_3205939	G	A	synonymous	g3408	S	S
tig00000020_pilon_pilon_705117	A	G	synonymous	g3976	L	L
tig00000020_pilon_pilon_1242416	A	G	non-synonymous	g4239	N	D
tig00000020_pilon_pilon_1263744	C	T	intergenic-region
tig00000020_pilon_pilon_1412232	T	A	non-synonymous	g4319	S	C
tig00000020_pilon_pilon_2785949	G	T	non-synonymous	g4968	S	Y
tig00000020_pilon_pilon_2886867	C	T	intergenic-region
tig00000023_pilon_pilon_2110603	G	A	non-synonymous	g5979	D	N
tig00000023_pilon_pilon_2181280	G	A	synonymous	g6014	P	P
tig00000023_pilon_pilon_3015467	G	A	non-synonymous	g6404	P	L
tig00000023_pilon_pilon_3015468	G	A	non-synonymous	g6404	P	S
tig00000023_pilon_pilon_3447331	A	G	non-CDS	g6583
tig00000030_pilon_pilon_254372	T	G	intergenic-region
tig00000035_pilon_pilon_171939	A	G	non-CDS	g7082
tig00000035_pilon_pilon_2258725	T	C	synonymous	g7987	L	L
tig00000046_pilon_pilon_711948	C	A	non-synonymous	g9729	G	V
tig00000105_pilon_pilon_2504428	C	T	intergenic-region
tig00000117_pilon_pilon_201569	A	T	non-CDS	g13216
tig00000122_pilon_pilon_1344347	G	A	synonymous	g15656	V	V
tig00000124_pilon_pilon_172405	C	T	intergenic-region
tig00000001_pilon_pilon_30733	C	T	intergenic-region
tig00000001_pilon_pilon_1052261	C	T	non-synonymous	g433	Q	*
tig00000001_pilon_pilon_1975516	C	T	promoter	g862
tig00000001_pilon_pilon_2069628	C	T	non-synonymous	g904	L	F
tig00000001_pilon_pilon_3608726	G	A	non-synonymous	g1571	P	S
tig00000011_pilon_pilon_1875400	C	T	non-synonymous	g2770	G	E
tig00000011_pilon_pilon_1962292	C	T	synonymous	g2814	I	I
tig00000011_pilon_pilon_3006157	C	T	non-CDS	g3312
tig00000011_pilon_pilon_3006158	T	C	non-CDS	g3312
tig00000011_pilon_pilon_3104885	C	T	non-CDS	g3355
tig00000020_pilon_pilon_1225580	G	A	non-synonymous	g4232	A	V
tig00000020_pilon_pilon_1796551	C	T	intergenic-region
tig00000020_pilon_pilon_2189558	T	A	synonymous	g4696	R	R
tig00000020_pilon_pilon_2830186	T	G	non-synonymous	g4989	K	Q
tig00000020_pilon_pilon_2861071	G	A	non-synonymous	g5004	D	N
tig00000023_pilon_pilon_2962591	C	T	non-synonymous	g6372	L	F
tig00000023_pilon_pilon_3248509	C	T	non-CDS	g6496
tig00000023_pilon_pilon_3477720	G	A	non-CDS	g6597
tig00000030_pilon_pilon_84071	G	A	intergenic-region
tig00000035_pilon_pilon_371720	C	T	intergenic-region
tig00000035_pilon_pilon_697230	C	T	non-synonymous	g7296	P	L
tig00000035_pilon_pilon_943219	A	G	promoter	g7410
tig00000035_pilon_pilon_1563853	C	T	synonymous	g7664	F	F
tig00000044_pilon_pilon_205191	C	T	intergenic-region
tig00000046_pilon_pilon_1006731	A	G	intergenic-region
tig00000046_pilon_pilon_1006732	G	A	intergenic-region
tig00000046_pilon_pilon_1634752	C	T	synonymous	g10127	S	S
tig00000107_pilon_pilon_470768	G	A	synonymous	g11913	E	E
tig00000107_pilon_pilon_838077	C	T	non-CDS	g12081
tig00000107_pilon_pilon_1967672	C	T	intergenic-region
tig00000107_pilon_pilon_2082914	G	A	non-synonymous	g12594	L	F
tig00000121_pilon_pilon_1250418	G	T	non-synonymous	g14321	T	K
tig00000121_pilon_pilon_2325094	A	G	intergenic-region
tig00000122_pilon_pilon_35511	C	T	intergenic-region
tig00000122_pilon_pilon_440219	A	T	non-CDS	g15242
tig00000122_pilon_pilon_2120111	C	T	non-synonymous	g16014	S	F
tig00000001_pilon_pilon_737280	C	T	non-CDS	g301
tig00000001_pilon_pilon_1168714	G	A	non-synonymous	g486	S	L
tig00000001_pilon_pilon_1662703	C	T	non-synonymous	g727	M	I
tig00000001_pilon_pilon_3524124	G	A	synonymous	g1535	T	T
tig00000001_pilon_pilon_3524125	G	A	non-synonymous	g1535	T	I
tig00000001_pilon_pilon_3740504	C	T	non-synonymous	g1635	L	F
tig00000011_pilon_pilon_234389	T	A	non-CDS	g2058
tig00000011_pilon_pilon_1471214	T	A	non-synonymous	g2579	F	I
tig00000011_pilon_pilon_1825056	G	A	non-CDS	g2745
tig00000011_pilon_pilon_2724512	C	T	non-synonymous	g3176	P	S
tig00000011_pilon_pilon_2724513	C	A	non-synonymous	g3176	P	Q
tig00000020_pilon_pilon_685887	C	T	non-synonymous	g3967	V	I
tig00000020_pilon_pilon_1398920	C	T	non-synonymous	g4311	P	S
tig00000020_pilon_pilon_1900348	C	T	synonymous	g4557	I	I
tig00000020_pilon_pilon_2148217	G	A	non-synonymous	g4678	D	N
tig00000020_pilon_pilon_2395517	C	T	synonymous	g4787	L	L
tig00000023_pilon_pilon_690781	T	A	non-CDS	g5369
tig00000023_pilon_pilon_2943074	C	T	non-synonymous	g6364	L	F
tig00000030_pilon_pilon_58690	C	A	promoter	g6834
tig00000044_pilon_pilon_526376	G	A	intergenic-region
tig00000046_pilon_pilon_865160	G	A	non-CDS	g9802
tig00000046_pilon_pilon_1943908	C	T	synonymous	g10263	T	T
tig00000105_pilon_pilon_786521	G	A	non-synonymous	g10823	E	K
tig00000105_pilon_pilon_1183101	G	A	intergenic-region
tig00000105_pilon_pilon_1183102	G	A	intergenic-region
tig00000121_pilon_pilon_372220	G	A	synonymous	g13929	L	L
tig00000121_pilon_pilon_980807	C	A	intergenic-region
tig00000122_pilon_pilon_531594	G	A	intergenic-region
tig00000122_pilon_pilon_816920	G	A	synonymous	g15409	I	I
tig00000122_pilon_pilon_1233131	C	T	non-synonymous	g15607	D	N
tig00000122_pilon_pilon_1236924	G	A	non-synonymous	g15609	L	F
tig00000124_pilon_pilon_74187	T	C	intergenic-region
tig00000001_pilon_pilon_446608	G	A	non-synonymous	g174	W	*
tig00000001_pilon_pilon_2850310	C	T	non-synonymous	g1254	P	S
tig00000117_pilon_pilon_976431	A	G	non-CDS	g13573
tig00000044_pilon_pilon_1200853	T	C	non-synonymous	g8930	Y	C
tig00000001_pilon_pilon_1538649	T	A	non-synonymous	g672	I	F
tig00000001_pilon_pilon_1730224	A	T	non-synonymous	g760	L	Q
tig00000001_pilon_pilon_2009132	T	C	non-CDS	g880
tig00000001_pilon_pilon_2882423	G	T	non-synonymous	g1262	A	E
tig00000001_pilon_pilon_3945181	G	A	intergenic-region
tig00000001_pilon_pilon_4048855	C	T	non-CDS	g1768
tig00000011_pilon_pilon_865615	A	C	intergenic-region
tig00000011_pilon_pilon_1866457	C	T	non-synonymous	g2764	P	S
tig00000011_pilon_pilon_1866458	C	T	non-synonymous	g2764	P	L
tig00000011_pilon_pilon_2048570	T	C	non-synonymous	g2855	K	E
tig00000011_pilon_pilon_2474500	T	A	non-synonymous	g3060	H	L
tig00000011_pilon_pilon_2514039	C	T	synonymous	g3082	A	A
tig00000020_pilon_pilon_815057	C	T	non-synonymous	g4031	V	I
tig00000020_pilon_pilon_995633	T	A	non-CDS	g4119
tig00000023_pilon_pilon_2750719	C	T	non-CDS	g6273
tig00000023_pilon_pilon_2781206	T	C	non-synonymous	g6286	I	T
tig00000030_pilon_pilon_273093	C	T	non-synonymous	g6933	E	K
tig00000035_pilon_pilon_479871	C	T	non-synonymous	g7207	E	K
tig00000035_pilon_pilon_1547816	G	A	synonymous	g7659	K	K
tig00000044_pilon_pilon_2340127	C	T	intergenic-region
tig00000105_pilon_pilon_1877441	C	T	synonymous	g11322	F	F
tig00000122_pilon_pilon_147430	C	T	intergenic-region
tig00000122_pilon_pilon_744375	A	T	non-synonymous	g15379	I	F
tig00000122_pilon_pilon_979283	C	T	synonymous	g15478	G	G
tig00000122_pilon_pilon_979285	T	C	non-synonymous	g15478	F	S
tig00000122_pilon_pilon_2533677	C	T	synonymous	g16183	F	F
tig00000122_pilon_pilon_2566225	G	A	non-synonymous	g16195	P	L
tig00000122_pilon_pilon_2566226	G	A	non-synonymous	g16195	P	S
tig00000122_pilon_pilon_2646147	C	T	non-synonymous	g16231	P	S
tig00000001_pilon_pilon_220776	C	T	non-synonymous	g87	E	K
tig00000001_pilon_pilon_220777	C	T	synonymous	g87	E	E
tig00000001_pilon_pilon_2086237	T	C	synonymous	g912	S	S
tig00000001_pilon_pilon_2270293	G	A	synonymous	g1002	V	V
tig00000001_pilon_pilon_2300185	T	G	synonymous	g1012	T	T
tig00000001_pilon_pilon_3061696	C	T	non-CDS	g1333
tig00000001_pilon_pilon_3614808	G	A	non-CDS	g1573
tig00000020_pilon_pilon_382701	A	C	non-synonymous	g3823	*	S
tig00000020_pilon_pilon_2176703	G	T	non-synonymous	g4689	E	*
tig00000023_pilon_pilon_1066466	C	T	non-synonymous	g5535	E	K
tig00000023_pilon_pilon_1544602	G	A	synonymous	g5742	S	S
tig00000023_pilon_pilon_1544616	C	A	non-synonymous	g5742	E	*
tig00000035_pilon_pilon_2138659	A	T	non-synonymous	g7931	N	I
tig00000105_pilon_pilon_1195398	A	G	non-CDS	g11008
tig00000122_pilon_pilon_221644	T	C	intergenic-region
tig00000122_pilon_pilon_1152149	C	G	synonymous	g15569	T	T
tig00000001_pilon_pilon_464465	A	G	non-synonymous	g181	K	E
tig00000001_pilon_pilon_2144821	C	A	synonymous	g941	P	P
tig00000001_pilon_pilon_2144822	C	T	synonymous	g941	L	L
tig00000001_pilon_pilon_2378973	A	T	non-synonymous	g1048	I	N
tig00000001_pilon_pilon_2554401	G	A	synonymous	g1114	K	K
tig00000001_pilon_pilon_2566104	T	A	non-synonymous	g1119	L	*
tig00000001_pilon_pilon_2888984	G	A	non-CDS	g1264
tig00000011_pilon_pilon_1291969	G	A	non-synonymous	g2507	S	F
tig00000011_pilon_pilon_1291979	G	A	non-synonymous	g2507	P	S
tig00000011_pilon_pilon_3480000	C	T	intergenic-region
tig00000020_pilon_pilon_1932719	G	A	non-synonymous	g4571	L	F
tig00000020_pilon_pilon_1932720	G	T	non-synonymous	g4571	N	K
tig00000023_pilon_pilon_3326701	C	T	intergenic-region
tig00000035_pilon_pilon_826991	A	G	non-synonymous	g7359	V	A
tig00000035_pilon_pilon_964344	C	T	synonymous	g7420	I	I
tig00000035_pilon_pilon_2195458	C	T	non-CDS	g7962
tig00000044_pilon_pilon_1266695	C	T	promoter	g8956
tig00000044_pilon_pilon_1820225	C	T	non-CDS	g9186
tig00000105_pilon_pilon_1776018	T	C	non-CDS	g11274
tig00000105_pilon_pilon_2751490	G	A	non-synonymous	g11672	W	*
tig00000107_pilon_pilon_334609	A	G	synonymous	g11851	F	F
tig00000107_pilon_pilon_405943	A	G	non-synonymous	g11884	K	R
tig00000107_pilon_pilon_405946	G	A	non-synonymous	g11884	R	K
tig00000117_pilon_pilon_709299	T	A	non-synonymous	g13441	N	K
tig00000044_pilon_pilon_1704560	C	T	intergenic-region
tig00000001_pilon_pilon_1191505	T	C	non-CDS	g499
tig00000011_pilon_pilon_605466	T	A	intergenic-region
tig00000011_pilon_pilon_1451362	T	G	promoter	g2570
tig00000020_pilon_pilon_1823453	T	G	non-synonymous	g4519	K	T
tig00000023_pilon_pilon_2786064	G	T	promoter	g6288
tig00000044_pilon_pilon_598683	A	T	non-synonymous	g8666	N	I
tig00000046_pilon_pilon_278416	G	A	non-synonymous	g9568	P	L
tig00000046_pilon_pilon_1913623	T	A	non-CDS	g10248
tig00000105_pilon_pilon_158891	G	A	intergenic-region
tig00000105_pilon_pilon_1843323	A	T	synonymous	g11306	P	P
tig00000105_pilon_pilon_1975147	G	A	non-synonymous	g11365	S	F
tig00000107_pilon_pilon_113880	G	A	synonymous	g11742	I	I
tig00000107_pilon_pilon_2275886	C	T	synonymous	g12689	L	L
tig00000117_pilon_pilon_221408	C	T	non-synonymous	g13225	S	F
tig00000117_pilon_pilon_602679	C	T	non-synonymous	g13392	G	S
tig00000117_pilon_pilon_827758	G	A	non-synonymous	g13503	S	N
tig00000121_pilon_pilon_225043	G	A	non-CDS	g13874
tig00000121_pilon_pilon_598695	T	C	intergenic-region
tig00000001_pilon_pilon_524046	C	T	non-synonymous	g207	R	K
tig00000001_pilon_pilon_1384348	A	T	non-CDS	g588
tig00000001_pilon_pilon_1384349	T	C	non-CDS	g588
tig00000001_pilon_pilon_1663962	G	A	non-synonymous	g727	L	F
tig00000001_pilon_pilon_2172422	G	T	synonymous	g953	R	R
tig00000001_pilon_pilon_2805782	A	T	non-synonymous	g1234	N	Y
tig00000011_pilon_pilon_443008	C	T	synonymous	g2147	L	L
tig00000011_pilon_pilon_2013141	A	G	non-CDS	g2840
tig00000011_pilon_pilon_3355689	A	G	intergenic-region
tig00000020_pilon_pilon_221600	G	A	synonymous	g3753	N	N
tig00000020_pilon_pilon_2635367	T	A	non-CDS	g4900
tig00000023_pilon_pilon_615521	A	G	intergenic-region
tig00000023_pilon_pilon_2918542	C	T	non-synonymous	g6352	D	N
tig00000023_pilon_pilon_3032451	T	C	non-CDS	g6411
tig00000030_pilon_pilon_91677	G	A	intergenic-region
tig00000030_pilon_pilon_91697	A	G	intergenic-region
tig00000035_pilon_pilon_423985	A	C	non-CDS	g7181
tig00000035_pilon_pilon_2555210	G	A	intergenic-region
tig00000044_pilon_pilon_1953979	C	T	synonymous	g9252	S	S
tig00000054_pilon_pilon_372536	A	T	non-CDS	g10509
tig00000105_pilon_pilon_216481	A	G	intergenic-region
tig00000105_pilon_pilon_416963	T	C	synonymous	g10659	I	I
tig00000105_pilon_pilon_546378	T	C	synonymous	g10721	V	V
tig00000105_pilon_pilon_1560669	A	G	intergenic-region
tig00000107_pilon_pilon_834746	G	A	non-synonymous	g12080	G	D
tig00000107_pilon_pilon_1334353	G	A	non-synonymous	g12270	S	F
tig00000117_pilon_pilon_399604	G	A	non-CDS	g13305
tig00000117_pilon_pilon_546015	C	T	non-synonymous	g13370	P	S
tig00000122_pilon_pilon_1180708	G	A	non-CDS	g15583
tig00000122_pilon_pilon_1212239	A	G	intergenic-region
tig00000122_pilon_pilon_1325542	C	T	intergenic-region
tig00000122_pilon_pilon_1325543	T	C	intergenic-region
tig00000122_pilon_pilon_1931440	C	G	non-synonymous	g15926	L	F
tig00000001_pilon_pilon_187122	A	G	intergenic-region
tig00000001_pilon_pilon_218301	C	T	non-synonymous	g86	Q	*
tig00000001_pilon_pilon_1260813	T	G	intergenic-region
tig00000001_pilon_pilon_2379530	T	A	non-synonymous	g1048	Y	F
tig00000001_pilon_pilon_2379534	A	T	non-synonymous	g1048	F	I
tig00000001_pilon_pilon_3562826	A	T	non-synonymous	g1553	*	L
tig00000001_pilon_pilon_3915764	T	C	non-CDS	g1707
tig00000011_pilon_pilon_1008024	A	G	non-synonymous	g2380	L	S
tig00000011_pilon_pilon_2191134	T	A	synonymous	g2925	A	A
tig00000011_pilon_pilon_3042077	G	A	intergenic-region
tig00000011_pilon_pilon_3144431	A	G	synonymous	g3373	L	L
tig00000020_pilon_pilon_1958710	A	T	non-synonymous	g4583	H	Q
tig00000023_pilon_pilon_1043504	G	A	non-CDS	g5527
tig00000023_pilon_pilon_3307904	G	T	intergenic-region
tig00000023_pilon_pilon_3631928	G	A	non-synonymous	g6664	S	L
tig00000030_pilon_pilon_65975	T	A	non-synonymous	g6839	I	N
tig00000035_pilon_pilon_35465	G	T	non-synonymous	g7022	P	T
tig00000035_pilon_pilon_285470	C	T	synonymous	g7125	T	T
tig00000035_pilon_pilon_740428	T	C	synonymous	g7316	S	S
tig00000035_pilon_pilon_1013323	C	T	non-synonymous	g7440	L	F
tig00000044_pilon_pilon_2021972	A	T	non-synonymous	g9280	F	I
tig00000046_pilon_pilon_656095	T	A	intergenic-region
tig00000046_pilon_pilon_766400	G	T	intergenic-region
tig00000105_pilon_pilon_190737	G	A	intergenic-region
tig00000105_pilon_pilon_190738	T	A	intergenic-region
tig00000105_pilon_pilon_1479708	G	A	non-synonymous	g11137	S	F
tig00000107_pilon_pilon_2050599	G	T	intergenic-region
tig00000107_pilon_pilon_2310325	C	T	non-synonymous	g12707	P	S
tig00000122_pilon_pilon_2627500	A	T	non-synonymous	g16221	L	Q
tig00000001_pilon_pilon_1527231	C	T	synonymous	g666	L	L
tig00000001_pilon_pilon_1832053	T	C	non-CDS	g798
tig00000001_pilon_pilon_3953961	G	A	synonymous	g1723	R	R
tig00000011_pilon_pilon_1654354	G	A	synonymous	g2663	T	T
tig00000011_pilon_pilon_1654355	G	A	non-synonymous	g2663	T	I
tig00000011_pilon_pilon_2098794	A	G	non-synonymous	g2883	L	S
tig00000011_pilon_pilon_2654695	T	C	promoter	g3143
tig00000011_pilon_pilon_3207874	A	T	intergenic-region
tig00000020_pilon_pilon_874899	C	T	non-synonymous	g4061	D	N
tig00000020_pilon_pilon_2191672	A	G	non-CDS	g4697
tig00000020_pilon_pilon_2899560	C	T	non-synonymous	g5019	R	K
tig00000023_pilon_pilon_555402	A	T	non-synonymous	g5312	Q	H
tig00000023_pilon_pilon_573892	G	A	synonymous	g5320	I	I
tig00000023_pilon_pilon_2610597	G	A	synonymous	g6216	L	L
tig00000023_pilon_pilon_3046095	T	C	intergenic-region
tig00000035_pilon_pilon_518101	G	A	non-synonymous	g7221	P	S
tig00000035_pilon_pilon_1442576	G	A	synonymous	g7611	E	E
tig00000035_pilon_pilon_1600799	G	A	intergenic-region
tig00000044_pilon_pilon_1131802	G	A	non-synonymous	g8896	G	E
tig00000044_pilon_pilon_1225089	C	T	synonymous	g8939	F	F
tig00000046_pilon_pilon_176730	G	A	non-synonymous	g9528	G	E
tig00000046_pilon_pilon_805885	T	C	synonymous	g9770	L	L
tig00000046_pilon_pilon_1225430	C	T	intergenic-region
tig00000054_pilon_pilon_248412	T	A	synonymous	g10454	P	P
tig00000105_pilon_pilon_577432	G	A	non-synonymous	g10737	E	K
tig00000105_pilon_pilon_1707170	A	G	synonymous	g11240	F	F
tig00000107_pilon_pilon_112495	C	T	non-synonymous	g11741	R	K
tig00000117_pilon_pilon_214908	C	T	non-synonymous	g13222	P	S
tig00000117_pilon_pilon_896215	C	A	non-CDS	g13531
tig00000117_pilon_pilon_896217	A	C	non-CDS	g13531
tig00000118_pilon_pilon_208358	G	A	promoter	g13754
tig00000121_pilon_pilon_233205	A	T	non-synonymous	g13878	D	E
tig00000121_pilon_pilon_233207	C	T	non-synonymous	g13878	D	N
tig00000121_pilon_pilon_528242	A	G	synonymous	g13998	L	L
tig00000121_pilon_pilon_528243	G	A	non-synonymous	g13998	V	M
tig00000122_pilon_pilon_119032	C	T	intergenic-region
tig00000122_pilon_pilon_358823	C	T	non-synonymous	g15207	W	*
tig00000122_pilon_pilon_538285	T	A	intergenic-region
tig00000122_pilon_pilon_839520	A	G	non-synonymous	g15420	M	V
tig00000122_pilon_pilon_1353529	T	A	synonymous	g15659	T	T
tig00000124_pilon_pilon_115106	C	T	synonymous	g16334	Q	Q
tig00000001_pilon_pilon_3576604	G	A	non-synonymous	g1559	G	S
tig00000001_pilon_pilon_3576605	G	T	non-synonymous	g1559	G	V
tig00000011_pilon_pilon_637617	A	G	non-synonymous	g2232	K	E
tig00000011_pilon_pilon_3601762	A	T	promoter	g3578
tig00000020_pilon_pilon_1248918	A	G	synonymous	g4242	V	V
tig00000020_pilon_pilon_1822978	T	C	non-CDS	g4518
tig00000020_pilon_pilon_2408849	C	T	non-CDS	g4796
tig00000020_pilon_pilon_2484435	G	T	non-synonymous	g4833	S	*
tig00000020_pilon_pilon_2503913	C	T	non-CDS	g4841
tig00000020_pilon_pilon_2647033	G	A	non-synonymous	g4910	P	L
tig00000020_pilon_pilon_2647034	G	A	non-synonymous	g4910	P	S
tig00000023_pilon_pilon_2510197	T	A	non-synonymous	g6164	N	K
tig00000023_pilon_pilon_2659563	C	T	non-CDS	g6240
tig00000035_pilon_pilon_145195	G	A	synonymous	g7068	I	I
tig00000035_pilon_pilon_237456	C	T	synonymous	g7105	I	I
tig00000035_pilon_pilon_617664	G	A	non-CDS	g7265
tig00000035_pilon_pilon_1803927	C	T	non-synonymous	g7772	W	*
tig00000041_pilon_pilon_437584	A	G	intergenic-region
tig00000044_pilon_pilon_1358085	A	T	non-synonymous	g8997	L	I
tig00000044_pilon_pilon_1497504	C	A	non-synonymous	g9057	G	V
tig00000107_pilon_pilon_285737	C	T	synonymous	g11832	Q	Q
tig00000107_pilon_pilon_1205113	G	A	non-synonymous	g12224	G	E
tig00000117_pilon_pilon_436653	T	C	non-synonymous	g13322	K	E
tig00000121_pilon_pilon_443763	A	T	non-synonymous	g13956	F	L
tig00000122_pilon_pilon_779628	G	A	non-synonymous	g15397	P	L
tig00000001_pilon_pilon_1244590	A	T	promoter	g523
tig00000001_pilon_pilon_1773548	T	C	non-CDS	g775
tig00000001_pilon_pilon_2039603	C	G	non-synonymous	g891	Q	E
tig00000001_pilon_pilon_4351242	A	G	intergenic-region
tig00000001_pilon_pilon_4396344	G	A	non-synonymous	g1931	S	L
tig00000011_pilon_pilon_548815	G	A	synonymous	g2194	I	I
tig00000011_pilon_pilon_1910245	A	C	non-synonymous	g2790	L	F
tig00000011_pilon_pilon_3344626	G	A	synonymous	g3467	V	V
tig00000020_pilon_pilon_138235	G	A	non-CDS	g3710
tig00000020_pilon_pilon_1466608	T	C	intergenic-region
tig00000023_pilon_pilon_3491563	A	G	non-CDS	g6601
tig00000044_pilon_pilon_262094	C	T	synonymous	g8524	F	F
tig00000105_pilon_pilon_889532	G	A	synonymous	g10873	D	D
tig00000107_pilon_pilon_208927	G	A	promoter	g11791
tig00000107_pilon_pilon_208928	G	A	promoter	g11791
tig00000107_pilon_pilon_570172	T	A	intergenic-region
tig00000107_pilon_pilon_1921027	G	A	non-synonymous	g12526	L	F
tig00000107_pilon_pilon_2147007	C	T	non-synonymous	g12620	H	Y
tig00000113_pilon_pilon_235722	T	G	non-synonymous	g13019	L	*
tig00000115_pilon_pilon_76097	G	A	synonymous	g13107	E	E
tig00000117_pilon_pilon_21927	G	C	intergenic-region
tig00000117_pilon_pilon_930167	G	A	synonymous	g13548	D	D
tig00000118_pilon_pilon_153613	G	A	non-synonymous	g13730	P	L
tig00000121_pilon_pilon_449395	C	T	non-synonymous	g13959	L	F
tig00000121_pilon_pilon_1265108	G	A	non-synonymous	g14328	Q	*
tig00000122_pilon_pilon_725219	G	A	intergenic-region
tig00000122_pilon_pilon_1665555	G	A	synonymous	g15808	Y	Y
tig00000122_pilon_pilon_1665556	T	C	non-synonymous	g15808	Y	C
tig00000122_pilon_pilon_1949480	A	G	non-CDS	g15934
tig00000122_pilon_pilon_2202012	G	A	non-synonymous	g16047	S	L
tig00000122_pilon_pilon_2600309	C	T	non-synonymous	g16211	P	S
tig00000122_pilon_pilon_2602023	T	C	non-CDS	g16211
tig00000122_pilon_pilon_2661671	G	A	non-synonymous	g16240	V	I
tig00000122_pilon_pilon_2661672	T	A	non-synonymous	g16240	V	D
tig00000001_pilon_pilon_263337	A	T	non-synonymous	g107	L	*
tig00000001_pilon_pilon_1257963	G	A	non-synonymous	g529	W	*
tig00000011_pilon_pilon_604466	C	T	non-synonymous	g2219	A	V
tig00000020_pilon_pilon_2097068	C	T	synonymous	g4658	Q	Q
tig00000020_pilon_pilon_2097069	T	A	non-synonymous	g4658	Q	L
tig00000023_pilon_pilon_981690	C	T	non-synonymous	g5498	P	S
tig00000023_pilon_pilon_981691	C	T	non-synonymous	g5498	P	L
tig00000023_pilon_pilon_1987157	G	A	synonymous	g5926	E	E
tig00000023_pilon_pilon_3244923	G	A	synonymous	g6494	I	I
tig00000035_pilon_pilon_623196	A	T	non-synonymous	g7267	I	K
tig00000035_pilon_pilon_1013421	T	A	non-synonymous	g7440	F	L
tig00000035_pilon_pilon_1566576	C	T	non-synonymous	g7665	E	K
tig00000035_pilon_pilon_1713501	A	G	promoter	g7729
tig00000044_pilon_pilon_293983	C	T	synonymous	g8536	V	V
tig00000046_pilon_pilon_394108	G	A	synonymous	g9605	V	V
tig00000046_pilon_pilon_1974695	G	T	promoter	g10278
tig00000046_pilon_pilon_1974696	G	A	promoter	g10278
tig00000105_pilon_pilon_686822	T	A	non-CDS	g10781
tig00000105_pilon_pilon_1504724	G	A	non-CDS	g11147
tig00000105_pilon_pilon_2512828	G	A	synonymous	g11581	F	F
tig00000122_pilon_pilon_226594	T	A	intergenic-region
tig00000122_pilon_pilon_780772	G	A	intergenic-region
tig00000122_pilon_pilon_780773	G	A	intergenic-region
tig00000122_pilon_pilon_1283301	T	G	synonymous	g15631	V	V
tig00000122_pilon_pilon_1714187	C	T	intergenic-region
tig00000001_pilon_pilon_184616	A	T	non-CDS	g70
tig00000001_pilon_pilon_532859	C	T	synonymous	g213	L	L
tig00000001_pilon_pilon_693678	G	A	non-CDS	g281
tig00000001_pilon_pilon_728157	G	A	synonymous	g298	L	L
tig00000001_pilon_pilon_1122314	C	T	non-synonymous	g462	S	F
tig00000001_pilon_pilon_2435809	T	A	intergenic-region
tig00000001_pilon_pilon_2746424	C	T	synonymous	g1206	G	G
tig00000001_pilon_pilon_3454072	C	T	promoter	g1508
tig00000001_pilon_pilon_3628444	G	A	non-CDS	g1580
tig00000011_pilon_pilon_151503	T	C	intergenic-region
tig00000011_pilon_pilon_2159716	C	T	non-synonymous	g2917	L	F
tig00000011_pilon_pilon_2766949	G	T	non-synonymous	g3193	P	T
tig00000020_pilon_pilon_141633	G	A	non-synonymous	g3710	P	S
tig00000020_pilon_pilon_141634	T	A	non-synonymous	g3710	E	D
tig00000020_pilon_pilon_316125	C	T	intergenic-region
tig00000020_pilon_pilon_455849	A	T	non-synonymous	g3857	K	*
tig00000020_pilon_pilon_837016	A	C	non-synonymous	g4046	L	V
tig00000020_pilon_pilon_1182346	C	T	synonymous	g4207	N	N
tig00000020_pilon_pilon_2838326	C	G	intergenic-region
tig00000020_pilon_pilon_2838330	C	T	intergenic-region
tig00000023_pilon_pilon_2875762	G	A	promoter	g6332
tig00000023_pilon_pilon_2930344	G	A	non-CDS	g6358
tig00000030_pilon_pilon_254189	C	T	intergenic-region
tig00000035_pilon_pilon_61756	G	T	promoter	g7034
tig00000035_pilon_pilon_324398	G	A	promoter	g7137
tig00000035_pilon_pilon_970831	C	A	promoter	g7422
tig00000035_pilon_pilon_1087444	C	T	intergenic-region
tig00000035_pilon_pilon_1550466	A	T	non-CDS	g7659
tig00000035_pilon_pilon_1577765	T	A	non-synonymous	g7669	L	*
tig00000035_pilon_pilon_2067115	A	T	non-CDS	g7896
tig00000035_pilon_pilon_2125810	C	T	synonymous	g7925	L	L
tig00000041_pilon_pilon_68511	G	A	intergenic-region
tig00000041_pilon_pilon_68512	G	A	intergenic-region
tig00000041_pilon_pilon_110874	C	T	non-synonymous	g8183	P	S
tig00000041_pilon_pilon_110875	C	A	non-synonymous	g8183	P	Q
tig00000046_pilon_pilon_251965	C	T	non-CDS	g9555
tig00000046_pilon_pilon_456690	C	T	promoter	g9631
tig00000046_pilon_pilon_1929479	G	A	intergenic-region
tig00000046_pilon_pilon_1929480	G	A	intergenic-region
tig00000105_pilon_pilon_654271	G	A	non-CDS	g10766
tig00000105_pilon_pilon_948085	G	A	synonymous	g10901	L	L
tig00000105_pilon_pilon_1661570	G	A	synonymous	g11218	L	L
tig00000105_pilon_pilon_1706642	G	A	non-synonymous	g11240	S	L
tig00000107_pilon_pilon_999892	C	A	non-synonymous	g12151	S	Y
tig00000107_pilon_pilon_999893	C	T	synonymous	g12151	S	S
tig00000107_pilon_pilon_1790356	C	T	synonymous	g12480	T	T
tig00000117_pilon_pilon_463367	G	A	promoter	g13329
tig00000117_pilon_pilon_463368	G	A	promoter	g13329
tig00000121_pilon_pilon_478683	G	A	synonymous	g13973	A	A
tig00000121_pilon_pilon_1458098	G	A	promoter	g14414
tig00000121_pilon_pilon_1738387	C	T	non-CDS	g14519
tig00000121_pilon_pilon_2409624	G	A	promoter	g14780
tig00000122_pilon_pilon_328182	G	A	non-synonymous	g15192	W	*
tig00000122_pilon_pilon_328183	G	A	non-synonymous	g15192	V	I
tig00000122_pilon_pilon_1199683	G	A	non-synonymous	g15591	S	F
tig00000122_pilon_pilon_1517339	C	T	non-synonymous	g15739	G	S
tig00000122_pilon_pilon_2408802	C	T	promoter	g16124
tig00000001_pilon_pilon_190200	G	A	promoter	g71
tig00000001_pilon_pilon_613725	G	A	non-CDS	g244
tig00000001_pilon_pilon_1094176	A	G	non-synonymous	g450	L	P
tig00000001_pilon_pilon_1094177	G	A	non-synonymous	g450	L	F
tig00000001_pilon_pilon_1886486	G	A	non-CDS	g821
tig00000001_pilon_pilon_2433170	G	A	non-CDS	g1068
tig00000001_pilon_pilon_2623131	A	G	non-CDS	g1147
tig00000001_pilon_pilon_3536635	G	A	non-synonymous	g1541	E	K
tig00000001_pilon_pilon_3734363	C	T	non-synonymous	g1632	E	K
tig00000001_pilon_pilon_4179761	C	T	synonymous	g1832	F	F
tig00000001_pilon_pilon_4179762	C	T	non-synonymous	g1832	R	C
tig00000001_pilon_pilon_4266203	C	T	non-synonymous	g1873	A	V
tig00000011_pilon_pilon_447492	C	T	non-CDS	g2150
tig00000011_pilon_pilon_630551	G	C	non-synonymous	g2229	L	V
tig00000011_pilon_pilon_2789028	G	A	promoter	g3202
tig00000011_pilon_pilon_3596420	G	A	intergenic-region
tig00000011_pilon_pilon_3596421	G	A	intergenic-region
tig00000020_pilon_pilon_861313	G	A	synonymous	g4057	D	D
tig00000020_pilon_pilon_1027151	A	T	non-CDS	g4132
tig00000020_pilon_pilon_1847751	C	T	non-CDS	g4533
tig00000023_pilon_pilon_47048	G	A	intergenic-region
tig00000023_pilon_pilon_1589445	G	C	non-synonymous	g5755	R	P
tig00000023_pilon_pilon_1589449	C	A	non-synonymous	g5755	D	E
tig00000023_pilon_pilon_1589450	C	T	synonymous	g5755	L	L
tig00000023_pilon_pilon_1912585	C	T	non-synonymous	g5898	G	E
tig00000023_pilon_pilon_1926322	T	A	non-synonymous	g5903	Y	N
tig00000023_pilon_pilon_2000401	C	T	non-synonymous	g5932	L	F
tig00000023_pilon_pilon_2112806	C	T	non-synonymous	g5980	S	F
tig00000023_pilon_pilon_2359249	G	A	non-CDS	g6095
tig00000023_pilon_pilon_2440859	G	T	promoter	g6130
tig00000035_pilon_pilon_1319332	C	T	intergenic-region
tig00000035_pilon_pilon_1826718	C	T	promoter	g7784
tig00000035_pilon_pilon_1826722	T	C	promoter	g7784
tig00000041_pilon_pilon_81712	G	A	synonymous	g8172	Q	Q
tig00000044_pilon_pilon_21212	G	A	promoter	g8411
tig00000044_pilon_pilon_241310	G	A	non-synonymous	g8515	L	F
tig00000044_pilon_pilon_297466	C	T	synonymous	g8537	A	A
tig00000044_pilon_pilon_764444	C	T	non-CDS	g8730
tig00000044_pilon_pilon_794761	C	T	promoter	g8746
tig00000044_pilon_pilon_794762	T	C	promoter	g8746
tig00000044_pilon_pilon_2144325	G	A	promoter	g9333
tig00000046_pilon_pilon_905325	C	T	non-CDS	g9821
tig00000046_pilon_pilon_1606844	G	A	synonymous	g10117	L	L
tig00000046_pilon_pilon_1686825	G	A	non-synonymous	g10154	G	S
tig00000046_pilon_pilon_1885713	C	T	synonymous	g10236	L	L
tig00000054_pilon_pilon_68118	C	T	synonymous	g10368	L	L
tig00000054_pilon_pilon_265721	C	T	non-CDS	g10465
tig00000105_pilon_pilon_349446	C	T	synonymous	g10636	Q	Q
tig00000105_pilon_pilon_664102	G	A	intergenic-region
tig00000105_pilon_pilon_1327512	T	A	intergenic-region
tig00000107_pilon_pilon_1781219	G	A	non-CDS	g12477
tig00000113_pilon_pilon_321828	T	C	non-synonymous	g13060	Y	H
tig00000117_pilon_pilon_229995	A	C	non-synonymous	g13228	Y	D
tig00000117_pilon_pilon_370809	G	T	synonymous	g13290	R	R
tig00000121_pilon_pilon_1387632	G	A	synonymous	g14379	F	F
tig00000122_pilon_pilon_1833125	C	T	non-synonymous	g15880	P	S
tig00000122_pilon_pilon_1833126	C	T	non-synonymous	g15880	P	L
tig00000122_pilon_pilon_1856150	C	T	non-synonymous	g15889	A	V
tig00000124_pilon_pilon_70213	C	T	non-synonymous	g16310	R	W
tig00000001_pilon_pilon_333044	G	A	synonymous	g132	S	S
tig00000054_pilon_pilon_182775	G	A	non-synonymous	g10422	W	*
tig00000011_pilon_pilon_413821	G	A	non-synonymous	g2134	V	I
tig00000011_pilon_pilon_1002995	C	T	non-synonymous	g2378	A	V
tig00000011_pilon_pilon_1714701	A	G	synonymous	g2686	P	P
tig00000011_pilon_pilon_1714702	G	T	non-synonymous	g2686	P	H
tig00000011_pilon_pilon_2091694	T	C	promoter	g2878
tig00000020_pilon_pilon_1305265	G	A	synonymous	g4268	V	V
tig00000020_pilon_pilon_1561005	C	T	non-synonymous	g4392	V	I
tig00000023_pilon_pilon_778647	T	A	non-synonymous	g5400	F	I
tig00000023_pilon_pilon_2430120	G	A	non-synonymous	g6125	E	K
tig00000030_pilon_pilon_347229	G	A	intergenic-region
tig00000035_pilon_pilon_1561142	A	T	non-synonymous	g7663	H	Q
tig00000035_pilon_pilon_1962659	G	A	non-synonymous	g7846	P	L
tig00000035_pilon_pilon_2612506	C	T	non-synonymous	g8132	P	L
tig00000046_pilon_pilon_932385	G	A	non-synonymous	g9832	E	K
tig00000105_pilon_pilon_778454	A	G	non-synonymous	g10820	Q	R
tig00000105_pilon_pilon_2111938	C	T	synonymous	g11414	E	E
tig00000105_pilon_pilon_2204516	C	T	non-synonymous	g11459	P	S
tig00000107_pilon_pilon_1998216	G	A	non-CDS	g12556
tig00000113_pilon_pilon_126429	T	C	synonymous	g12976	L	L
tig00000121_pilon_pilon_538926	A	C	intergenic-region
tig00000121_pilon_pilon_1177639	T	G	non-synonymous	g14291	L	*
tig00000122_pilon_pilon_187635	A	C	non-synonymous	g15123	*	E
tig00000001_pilon_pilon_172402	C	T	promoter	g63
tig00000001_pilon_pilon_473858	A	G	non-synonymous	g184	K	E
tig00000011_pilon_pilon_636882	C	T	non-CDS	g2231
tig00000011_pilon_pilon_869478	G	A	non-synonymous	g2324	L	F
tig00000011_pilon_pilon_2136863	C	T	non-synonymous	g2904	R	H
tig00000011_pilon_pilon_3085525	G	A	synonymous	g3345	I	I
tig00000011_pilon_pilon_3431714	T	A	non-synonymous	g3510	D	E
tig00000023_pilon_pilon_1196395	T	C	non-synonymous	g5593	I	T
tig00000023_pilon_pilon_2482155	C	T	non-CDS	g6150
tig00000023_pilon_pilon_2673269	C	T	non-synonymous	g6245	E	K
tig00000023_pilon_pilon_3086936	A	G	non-CDS	g6432
tig00000023_pilon_pilon_3086938	G	C	non-CDS	g6432
tig00000041_pilon_pilon_26399	A	T	intergenic-region
tig00000041_pilon_pilon_216294	A	G	intergenic-region
tig00000044_pilon_pilon_1240255	A	G	promoter	g8945
tig00000044_pilon_pilon_1745887	G	A	non-synonymous	g9158	S	F
tig00000044_pilon_pilon_2113449	C	T	intergenic-region
tig00000046_pilon_pilon_591564	C	T	intergenic-region
tig00000121_pilon_pilon_130993	C	T	intergenic-region
tig00000121_pilon_pilon_131058	T	C	intergenic-region
tig00000121_pilon_pilon_190384	C	G	intergenic-region
tig00000122_pilon_pilon_291962	T	C	promoter	g15169
tig00000122_pilon_pilon_357529	T	C	intergenic-region
tig00000122_pilon_pilon_1257988	T	A	non-synonymous	g15621	I	F
tig00000122_pilon_pilon_1484945	C	T	synonymous	g15723	A	A
tig00000001_pilon_pilon_1477387	T	G	non-synonymous	g637	D	A
tig00000001_pilon_pilon_2401525	A	G	non-synonymous	g1057	F	L
tig00000001_pilon_pilon_2768094	G	A	intergenic-region
tig00000011_pilon_pilon_2512757	C	T	promoter	g3081
tig00000011_pilon_pilon_2713331	C	T	synonymous	g3170	A	A
tig00000020_pilon_pilon_274134	C	T	promoter	g3777
tig00000020_pilon_pilon_865659	A	G	non-CDS	g4057
tig00000020_pilon_pilon_1779332	G	A	non-CDS	g4496
tig00000020_pilon_pilon_1779334	G	A	non-CDS	g4496
tig00000023_pilon_pilon_3205392	C	T	synonymous	g6475	I	I
tig00000023_pilon_pilon_3304698	C	T	non-synonymous	g6522	A	V
tig00000023_pilon_pilon_3304699	A	T	synonymous	g6522	A	A
tig00000030_pilon_pilon_210314	T	A	non-CDS	g6901
tig00000044_pilon_pilon_774188	G	A	non-synonymous	g8736	S	F
tig00000044_pilon_pilon_774190	G	T	synonymous	g8736	L	L
tig00000044_pilon_pilon_929980	T	G	non-CDS	g8805
tig00000044_pilon_pilon_1611523	G	A	synonymous	g9096	V	V
tig00000044_pilon_pilon_1762663	G	A	synonymous	g9164	F	F
tig00000044_pilon_pilon_1865884	T	C	non-synonymous	g9209	L	P
tig00000046_pilon_pilon_505258	C	T	non-synonymous	g9652	L	F
tig00000046_pilon_pilon_505259	T	A	non-synonymous	g9652	L	H
tig00000046_pilon_pilon_1888087	A	G	intergenic-region
tig00000046_pilon_pilon_1888088	G	A	intergenic-region
tig00000105_pilon_pilon_190812	C	T	intergenic-region
tig00000105_pilon_pilon_596250	G	C	intergenic-region
tig00000105_pilon_pilon_1490170	T	A	non-synonymous	g11141	D	V
tig00000105_pilon_pilon_2677448	G	A	promoter	g11645
tig00000105_pilon_pilon_2677449	T	A	promoter	g11645
tig00000107_pilon_pilon_749674	T	C	non-synonymous	g12044	F	S
tig00000107_pilon_pilon_750165	C	T	non-synonymous	g12044	P	S
tig00000117_pilon_pilon_668925	C	T	synonymous	g13420	K	K
tig00000121_pilon_pilon_998332	G	A	non-CDS	g14211
tig00000121_pilon_pilon_1155167	G	C	non-synonymous	g14284	I	M
tig00000122_pilon_pilon_663956	G	A	non-synonymous	g15338	R	C
tig00000122_pilon_pilon_663957	G	A	synonymous	g15338	D	D
tig00000122_pilon_pilon_2060686	T	C	synonymous	g15984	P	P
tig00000001_pilon_pilon_328549	A	C	non-synonymous	g129	N	T
tig00000001_pilon_pilon_700889	C	G	non-synonymous	g285	C	S
tig00000001_pilon_pilon_780785	C	T	synonymous	g323	L	L
tig00000001_pilon_pilon_780786	T	C	non-synonymous	g323	F	L
tig00000011_pilon_pilon_861576	G	A	non-synonymous	g2322	S	L
tig00000011_pilon_pilon_1476241	A	T	non-synonymous	g2581	T	S
tig00000011_pilon_pilon_3424585	T	C	non-synonymous	g3506	Y	H
tig00000023_pilon_pilon_1170121	G	A	synonymous	g5579	D	D
tig00000023_pilon_pilon_2048529	G	A	synonymous	g5954	L	L
tig00000023_pilon_pilon_2143725	G	A	non-synonymous	g5995	R	C
tig00000023_pilon_pilon_3310433	T	A	non-synonymous	g6525	Y	*
tig00000044_pilon_pilon_842005	T	C	non-CDS	g8766
tig00000046_pilon_pilon_1166228	G	A	intergenic-region
tig00000046_pilon_pilon_1925074	C	A	non-synonymous	g10256	V	F
tig00000054_pilon_pilon_224714	G	A	intergenic-region
tig00000054_pilon_pilon_326968	C	T	non-synonymous	g10489	P	L
tig00000105_pilon_pilon_711725	G	A	synonymous	g10795	G	G
tig00000105_pilon_pilon_1891864	T	G	non-synonymous	g11330	N	T
tig00000107_pilon_pilon_917424	C	T	non-CDS	g12115
tig00000107_pilon_pilon_987434	A	C	intergenic-region
tig00000113_pilon_pilon_308197	C	T	non-CDS	g13054
tig00000121_pilon_pilon_1250302	A	G	synonymous	g14321	A	A
tig00000121_pilon_pilon_1916713	A	G	synonymous	g14592	V	V
tig00000121_pilon_pilon_1916714	G	A	non-synonymous	g14592	D	N
tig00000122_pilon_pilon_446230	C	T	non-synonymous	g15244	T	I
tig00000122_pilon_pilon_1982812	A	C	non-CDS	g15948
tig00000122_pilon_pilon_2409047	G	A	synonymous	g16124	K	K
tig00000122_pilon_pilon_2728281	C	T	non-synonymous	g16276	S	F
tig00000001_pilon_pilon_1427084	A	T	synonymous	g611	A	A
tig00000001_pilon_pilon_1593844	C	A	intergenic-region
tig00000001_pilon_pilon_1593845	C	T	intergenic-region
tig00000001_pilon_pilon_2648907	A	C	non-synonymous	g1158	I	S
tig00000001_pilon_pilon_2648908	T	C	non-synonymous	g1158	I	V
tig00000001_pilon_pilon_3163650	G	A	non-synonymous	g1377	R	C
tig00000001_pilon_pilon_3728486	T	G	intergenic-region
tig00000011_pilon_pilon_549460	C	T	non-synonymous	g2194	E	K
tig00000011_pilon_pilon_1916536	T	A	intergenic-region
tig00000011_pilon_pilon_2096641	G	A	synonymous	g2881	Y	Y
tig00000011_pilon_pilon_2420874	G	A	non-synonymous	g3033	P	S
tig00000011_pilon_pilon_3296284	T	C	intergenic-region
tig00000020_pilon_pilon_2110228	G	A	synonymous	g4664	L	L
tig00000020_pilon_pilon_2564973	C	T	non-CDS	g4865
tig00000023_pilon_pilon_777259	T	C	non-CDS	g5400
tig00000023_pilon_pilon_1424777	A	T	promoter	g5687
tig00000023_pilon_pilon_1924692	C	T	non-synonymous	g5903	A	V
tig00000023_pilon_pilon_2892979	A	T	non-CDS	g6340
tig00000023_pilon_pilon_3030604	C	T	non-synonymous	g6410	W	*
tig00000023_pilon_pilon_3164931	C	T	intergenic-region
tig00000023_pilon_pilon_3171184	G	A	non-synonymous	g6464	G	R
tig00000023_pilon_pilon_3171185	G	A	non-synonymous	g6464	G	E
tig00000035_pilon_pilon_158597	T	A	non-synonymous	g7075	I	N
tig00000035_pilon_pilon_1028002	C	T	non-CDS	g7449
tig00000035_pilon_pilon_1402692	C	T	non-synonymous	g7594	G	S
tig00000035_pilon_pilon_1483572	T	C	synonymous	g7634	L	L
tig00000035_pilon_pilon_1982848	G	A	non-synonymous	g7854	T	I
tig00000035_pilon_pilon_2159266	G	A	synonymous	g7944	L	L
tig00000035_pilon_pilon_2382586	G	A	intergenic-region
tig00000041_pilon_pilon_452701	C	T	non-CDS	g8308
tig00000044_pilon_pilon_1826122	C	T	non-CDS	g9188
tig00000046_pilon_pilon_759670	A	T	intergenic-region
tig00000105_pilon_pilon_1382160	G	A	non-synonymous	g11098	S	F
tig00000107_pilon_pilon_592231	G	A	intergenic-region
tig00000107_pilon_pilon_1635470	G	A	non-synonymous	g12422	G	S
tig00000107_pilon_pilon_1707852	G	A	non-synonymous	g12451	R	W
tig00000107_pilon_pilon_1767625	T	G	non-CDS	g12471
tig00000113_pilon_pilon_110470	T	C	synonymous	g12970	L	L
tig00000113_pilon_pilon_254761	G	A	non-synonymous	g13028	L	F
tig00000113_pilon_pilon_254810	A	G	non-CDS	g13028
tig00000113_pilon_pilon_256613	T	A	promoter	g13028
tig00000113_pilon_pilon_337617	G	A	non-synonymous	g13068	P	L
tig00000118_pilon_pilon_208797	C	A	non-synonymous	g13754	L	I
tig00000121_pilon_pilon_583606	C	A	non-synonymous	g14022	F	L
tig00000121_pilon_pilon_1421212	C	T	promoter	g14395
tig00000122_pilon_pilon_333354	C	T	synonymous	g15194	T	T
tig00000122_pilon_pilon_1030363	C	T	synonymous	g15503	I	I
tig00000122_pilon_pilon_1116062	G	A	non-synonymous	g15549	D	N
tig00000122_pilon_pilon_1862616	G	A	non-synonymous	g15891	P	L
tig00000122_pilon_pilon_1862617	G	T	non-synonymous	g15891	P	T
tig00000122_pilon_pilon_2447710	G	A	non-synonymous	g16140	L	F
tig00000001_pilon_pilon_284574	G	A	non-synonymous	g118	S	F
tig00000001_pilon_pilon_2275606	C	T	synonymous	g1004	K	K
tig00000001_pilon_pilon_3743040	T	C	non-synonymous	g1635	L	P
tig00000001_pilon_pilon_4189939	T	C	non-CDS	g1838
tig00000001_pilon_pilon_4426888	G	A	intergenic-region
tig00000011_pilon_pilon_935635	T	G	non-synonymous	g2352	N	H
tig00000011_pilon_pilon_1564436	A	T	synonymous	g2618	A	A
tig00000011_pilon_pilon_2769278	C	A	intergenic-region
tig00000020_pilon_pilon_209066	C	A	promoter	g3747
tig00000020_pilon_pilon_1976914	C	T	synonymous	g4593	D	D
tig00000020_pilon_pilon_2434232	A	G	non-synonymous	g4813	Y	H
tig00000023_pilon_pilon_629135	G	A	non-CDS	g5345
tig00000023_pilon_pilon_786935	G	A	non-synonymous	g5403	S	F
tig00000023_pilon_pilon_857228	G	T	intergenic-region
tig00000023_pilon_pilon_2978326	G	A	non-synonymous	g6381	S	N
tig00000035_pilon_pilon_322229	A	G	non-CDS	g7137
tig00000041_pilon_pilon_444639	T	A	non-synonymous	g8305	Y	N
tig00000044_pilon_pilon_816553	G	T	non-synonymous	g8755	T	N
tig00000044_pilon_pilon_1611407	G	A	non-CDS	g9096
tig00000044_pilon_pilon_1644789	T	C	synonymous	g9113	T	T
tig00000046_pilon_pilon_15865	A	G	non-CDS	g9462
tig00000046_pilon_pilon_763344	G	A	non-CDS	g9747
tig00000046_pilon_pilon_1817744	A	G	non-synonymous	g10204	L	S
tig00000105_pilon_pilon_662935	A	T	non-CDS	g10770
tig00000105_pilon_pilon_1479827	G	A	synonymous	g11137	I	I
tig00000105_pilon_pilon_1495257	G	A	synonymous	g11142	F	F
tig00000107_pilon_pilon_331487	T	G	non-CDS	g11850
tig00000107_pilon_pilon_1408367	G	C	non-synonymous	g12303	Q	E
tig00000107_pilon_pilon_1666677	G	A	non-synonymous	g12434	S	L
tig00000107_pilon_pilon_2030162	G	A	non-synonymous	g12573	P	L
tig00000107_pilon_pilon_2030163	G	A	non-synonymous	g12573	P	S
tig00000107_pilon_pilon_2093014	C	T	synonymous	g12598	E	E
tig00000107_pilon_pilon_2288248	G	A	non-synonymous	g12695	S	L
tig00000117_pilon_pilon_166336	C	T	intergenic-region
tig00000121_pilon_pilon_1160559	G	A	intergenic-region
tig00000122_pilon_pilon_259140	G	T	non-synonymous	g15155	G	C
tig00000122_pilon_pilon_277950	C	T	non-synonymous	g15163	A	V
tig00000122_pilon_pilon_1007305	C	T	non-synonymous	g15492	Q	*
tig00000122_pilon_pilon_1480256	G	A	non-synonymous	g15720	G	S
tig00000122_pilon_pilon_1595238	A	T	non-synonymous	g15772	N	I
tig00000122_pilon_pilon_1600265	T	C	intergenic-region
tig00000001_pilon_pilon_1174363	A	G	promoter	g490
tig00000001_pilon_pilon_1336328	C	T	non-CDS	g563
tig00000001_pilon_pilon_1932386	C	G	non-synonymous	g842	E	Q
tig00000001_pilon_pilon_3610717	C	T	non-synonymous	g1572	D	N
tig00000011_pilon_pilon_182867	G	A	non-synonymous	g2032	T	I
tig00000011_pilon_pilon_506340	G	A	non-synonymous	g2175	L	F
tig00000011_pilon_pilon_1425181	G	A	non-CDS	g2563
tig00000011_pilon_pilon_2243479	G	A	non-synonymous	g2953	L	F
tig00000011_pilon_pilon_2243480	G	A	synonymous	g2953	H	H
tig00000011_pilon_pilon_2589342	C	T	non-synonymous	g3115	H	Y
tig00000011_pilon_pilon_3273599	A	G	non-CDS	g3431
tig00000020_pilon_pilon_1034883	C	T	non-synonymous	g4134	P	S
tig00000020_pilon_pilon_2183092	T	A	intergenic-region
tig00000020_pilon_pilon_2915094	C	T	synonymous	g5024	R	R
tig00000020_pilon_pilon_2915095	C	T	non-synonymous	g5024	L	F
tig00000023_pilon_pilon_840485	G	A	non-CDS	g5427
tig00000023_pilon_pilon_1130786	C	T	synonymous	g5564	L	L
tig00000023_pilon_pilon_1577416	C	T	non-synonymous	g5751	R	*
tig00000023_pilon_pilon_1906914	G	A	synonymous	g5896	A	A
tig00000023_pilon_pilon_1955002	A	G	non-synonymous	g5912	K	E
tig00000023_pilon_pilon_3348608	T	C	intergenic-region
tig00000035_pilon_pilon_1496352	C	T	synonymous	g7637	N	N
tig00000035_pilon_pilon_1726802	G	T	non-synonymous	g7733	P	Q
tig00000035_pilon_pilon_2226358	C	T	synonymous	g7974	A	A
tig00000041_pilon_pilon_162031	G	A	non-CDS	g8196
tig00000044_pilon_pilon_2032617	A	C	promoter	g9285
tig00000044_pilon_pilon_2284122	G	T	promoter	g9392
tig00000044_pilon_pilon_2284123	G	T	promoter	g9392
tig00000046_pilon_pilon_46056	G	A	synonymous	g9475	D	D
tig00000046_pilon_pilon_244682	C	T	intergenic-region
tig00000046_pilon_pilon_809979	G	A	promoter	g9773
tig00000054_pilon_pilon_15009	A	T	intergenic-region
tig00000105_pilon_pilon_951399	A	T	non-CDS	g10902
tig00000107_pilon_pilon_281826	A	G	intergenic-region
tig00000107_pilon_pilon_1630405	A	G	non-synonymous	g12420	L	P
tig00000113_pilon_pilon_78745	T	C	intergenic-region
tig00000117_pilon_pilon_1095613	C	T	non-CDS	g13622
tig00000117_pilon_pilon_1095615	T	C	non-CDS	g13622
tig00000121_pilon_pilon_166340	G	A	intergenic-region
tig00000121_pilon_pilon_166341	G	A	intergenic-region
tig00000121_pilon_pilon_191300	G	A	non-CDS	g13859
tig00000121_pilon_pilon_459578	G	A	non-synonymous	g13964	P	L
tig00000121_pilon_pilon_2342149	G	A	synonymous	g14749	L	L
tig00000122_pilon_pilon_318242	G	A	synonymous	g15186	N	N
tig00000122_pilon_pilon_595227	T	C	non-synonymous	g15306	K	E
tig00000122_pilon_pilon_827318	C	T	promoter	g15414
tig00000122_pilon_pilon_2688168	C	T	intergenic-region
tig00000122_pilon_pilon_2688169	C	T	intergenic-region
tig00000025_pilon_pilon_167734	G	A	non-synonymous	g6791	E	K
tig00000044_pilon_pilon_891710	G	A	intergenic-region
tig00000046_pilon_pilon_396479	G	A	synonymous	g9606	P	P
tig00000105_pilon_pilon_1213701	G	A	non-synonymous	g11016	P	L
tig00000001_pilon_pilon_373457	T	C	promoter	g148
tig00000001_pilon_pilon_1492082	G	T	promoter	g645
tig00000001_pilon_pilon_3157292	C	G	non-synonymous	g1374	L	V
tig00000001_pilon_pilon_3511426	C	T	non-synonymous	g1530	P	S
tig00000001_pilon_pilon_3511427	C	T	non-synonymous	g1530	P	L
tig00000011_pilon_pilon_1340283	C	T	synonymous	g2528	L	L
tig00000011_pilon_pilon_1350667	C	T	non-synonymous	g2533	A	V
tig00000011_pilon_pilon_2679385	A	G	non-synonymous	g3153	L	S
tig00000020_pilon_pilon_223986	C	T	synonymous	g3753	K	K
tig00000020_pilon_pilon_476064	C	T	non-CDS	g3867
tig00000020_pilon_pilon_584096	T	C	synonymous	g3918	L	L
tig00000020_pilon_pilon_2383096	T	A	non-synonymous	g4782	*	L
tig00000023_pilon_pilon_1701389	A	G	non-synonymous	g5806	L	P
tig00000023_pilon_pilon_2050259	A	T	intergenic-region
tig00000035_pilon_pilon_1385636	C	T	non-synonymous	g7590	S	F
tig00000035_pilon_pilon_1446208	G	A	non-CDS	g7613
tig00000035_pilon_pilon_2314221	A	G	synonymous	g8012	L	L
tig00000041_pilon_pilon_457808	G	T	intergenic-region
tig00000044_pilon_pilon_317585	C	T	non-synonymous	g8545	P	S
tig00000044_pilon_pilon_931862	G	A	non-synonymous	g8806	S	F
tig00000044_pilon_pilon_1727150	C	T	synonymous	g9151	L	L
tig00000046_pilon_pilon_1034510	C	T	non-CDS	g9865
tig00000105_pilon_pilon_1179073	G	A	non-synonymous	g11003	D	N
tig00000105_pilon_pilon_1493544	G	A	non-synonymous	g11142	R	W
tig00000105_pilon_pilon_2409103	G	A	non-synonymous	g11542	G	D
tig00000107_pilon_pilon_1433801	C	T	intergenic-region
tig00000107_pilon_pilon_1912636	G	A	non-synonymous	g12522	V	M
tig00000113_pilon_pilon_45355	C	T	synonymous	g12947	F	F
tig00000117_pilon_pilon_295240	C	T	synonymous	g13255	L	L
tig00000117_pilon_pilon_333126	T	C	non-synonymous	g13276	I	V
tig00000117_pilon_pilon_545563	A	G	non-synonymous	g13370	Q	R
tig00000117_pilon_pilon_545565	T	A	non-synonymous	g13370	F	I
tig00000121_pilon_pilon_343807	G	T	non-synonymous	g13919	W	L
tig00000121_pilon_pilon_351354	C	T	non-synonymous	g13922	Q	*
tig00000121_pilon_pilon_440700	G	A	synonymous	g13955	L	L
tig00000121_pilon_pilon_1076108	C	T	synonymous	g14244	F	F
tig00000121_pilon_pilon_2228662	C	T	non-synonymous	g14709	G	E
tig00000122_pilon_pilon_542688	C	T	non-synonymous	g15282	S	F
tig00000122_pilon_pilon_1041295	A	T	non-synonymous	g15510	N	I
tig00000122_pilon_pilon_1186177	C	T	non-CDS	g15586
tig00000122_pilon_pilon_1611728	C	T	non-synonymous	g15780	L	F
tig00000122_pilon_pilon_2241133	C	T	non-synonymous	g16063	P	S
tig00000001_pilon_pilon_736671	T	A	non-CDS	g300
tig00000001_pilon_pilon_744253	T	C	synonymous	g305	L	L
tig00000001_pilon_pilon_879838	C	T	non-CDS	g365
tig00000001_pilon_pilon_917022	G	A	synonymous	g381	L	L
tig00000001_pilon_pilon_1196237	C	T	non-synonymous	g502	P	S
tig00000001_pilon_pilon_1333501	A	T	non-synonymous	g562	N	I
tig00000001_pilon_pilon_2025016	G	A	non-CDS	g885
tig00000001_pilon_pilon_2277540	G	A	synonymous	g1004	F	F
tig00000001_pilon_pilon_2653456	C	T	non-synonymous	g1160	S	F
tig00000001_pilon_pilon_3534157	C	T	non-CDS	g1539
tig00000011_pilon_pilon_904158	G	A	non-synonymous	g2342	Q	*
tig00000011_pilon_pilon_1288065	C	T	non-synonymous	g2505	S	L
tig00000011_pilon_pilon_1538041	C	T	non-synonymous	g2605	R	C
tig00000011_pilon_pilon_2108886	C	A	non-synonymous	g2888	R	S
tig00000011_pilon_pilon_2500073	G	A	non-synonymous	g3076	R	H
tig00000011_pilon_pilon_2500074	T	A	synonymous	g3076	R	R
tig00000011_pilon_pilon_2636582	C	T	non-synonymous	g3136	G	E
tig00000011_pilon_pilon_2636583	C	T	non-synonymous	g3136	G	R
tig00000011_pilon_pilon_2886772	T	C	non-synonymous	g3247	Y	H
tig00000011_pilon_pilon_2989538	C	T	intergenic-region
tig00000011_pilon_pilon_3264507	C	T	synonymous	g3429	V	V
tig00000011_pilon_pilon_3548001	G	A	intergenic-region
tig00000020_pilon_pilon_338453	G	A	non-synonymous	g3805	W	*
tig00000020_pilon_pilon_415869	T	C	non-CDS	g3837
tig00000020_pilon_pilon_512470	G	A	non-synonymous	g3886	P	L
tig00000020_pilon_pilon_727038	C	T	non-synonymous	g3987	E	K
tig00000020_pilon_pilon_999224	A	T	non-CDS	g4120
tig00000020_pilon_pilon_1321919	C	T	non-synonymous	g4278	S	F
tig00000020_pilon_pilon_1884216	A	G	promoter	g4549
tig00000020_pilon_pilon_2045570	T	A	non-CDS	g4627
tig00000020_pilon_pilon_2543416	A	G	non-synonymous	g4857	K	E
tig00000020_pilon_pilon_2909490	G	A	non-synonymous	g5023	S	F
tig00000023_pilon_pilon_289405	C	T	promoter	g5171
tig00000023_pilon_pilon_793933	C	T	non-synonymous	g5404	P	S
tig00000023_pilon_pilon_1298784	C	T	non-synonymous	g5634	P	S
tig00000023_pilon_pilon_1903116	C	T	non-CDS	g5895
tig00000023_pilon_pilon_1903118	C	T	non-CDS	g5895
tig00000023_pilon_pilon_1903119	C	T	non-CDS	g5895
tig00000023_pilon_pilon_2449397	T	C	non-synonymous	g6133	F	L
tig00000023_pilon_pilon_2567194	C	T	synonymous	g6193	T	T
tig00000023_pilon_pilon_3361073	T	G	promoter	g6546
tig00000023_pilon_pilon_3453986	G	A	intergenic-region
tig00000025_pilon_pilon_194351	A	T	synonymous	g6802	I	I
tig00000030_pilon_pilon_116749	G	A	non-CDS	g6861
tig00000035_pilon_pilon_553900	A	G	intergenic-region
tig00000035_pilon_pilon_553904	T	C	intergenic-region
tig00000035_pilon_pilon_1464922	G	A	non-synonymous	g7621	L	F
tig00000035_pilon_pilon_1712039	G	A	non-synonymous	g7729	A	V
tig00000035_pilon_pilon_2143483	C	T	non-synonymous	g7935	A	V
tig00000035_pilon_pilon_2221709	G	A	synonymous	g7971	F	F
tig00000035_pilon_pilon_2221710	A	T	non-synonymous	g7971	F	Y
tig00000041_pilon_pilon_232463	G	A	non-synonymous	g8224	S	F
tig00000041_pilon_pilon_456770	G	A	intergenic-region
tig00000044_pilon_pilon_328548	G	A	non-synonymous	g8550	P	S
tig00000044_pilon_pilon_507787	C	T	non-synonymous	g8625	P	S
tig00000044_pilon_pilon_507788	C	T	non-synonymous	g8625	P	L
tig00000044_pilon_pilon_879326	A	G	non-synonymous	g8783	K	E
tig00000044_pilon_pilon_1427923	T	C	promoter	g9025
tig00000044_pilon_pilon_1577227	G	C	synonymous	g9081	L	L
tig00000044_pilon_pilon_1577252	G	A	non-synonymous	g9081	S	F
tig00000044_pilon_pilon_1877320	T	C	intergenic-region
tig00000044_pilon_pilon_2286341	C	T	non-synonymous	g9393	S	F
tig00000044_pilon_pilon_2391009	G	A	non-synonymous	g9453	E	K
tig00000046_pilon_pilon_1305386	A	G	non-CDS	g9987
tig00000046_pilon_pilon_1630481	T	C	synonymous	g10126	P	P
tig00000105_pilon_pilon_231072	A	T	intergenic-region
tig00000105_pilon_pilon_1278295	G	A	intergenic-region
tig00000105_pilon_pilon_1463118	G	A	synonymous	g11130	F	F
tig00000105_pilon_pilon_1818025	C	T	non-CDS	g11296
tig00000105_pilon_pilon_2094383	C	T	intergenic-region
tig00000105_pilon_pilon_2094384	C	T	intergenic-region
tig00000105_pilon_pilon_2228330	C	T	non-synonymous	g11468	G	E
tig00000107_pilon_pilon_242554	G	A	non-synonymous	g11808	P	S
tig00000107_pilon_pilon_1135264	C	T	non-synonymous	g12204	L	F
tig00000113_pilon_pilon_155540	G	A	non-synonymous	g12991	P	L
tig00000121_pilon_pilon_211350	T	C	promoter	g13868
tig00000121_pilon_pilon_2107388	G	A	synonymous	g14661	F	F
tig00000122_pilon_pilon_1401431	G	A	intergenic-region
tig00000122_pilon_pilon_1411531	C	T	non-synonymous	g15685	L	F
tig00000001_pilon_pilon_1201777	G	A	non-synonymous	g504	R	C
tig00000001_pilon_pilon_2427139	C	T	non-synonymous	g1067	A	V
tig00000011_pilon_pilon_1391823	G	A	non-synonymous	g2547	S	F
tig00000011_pilon_pilon_3267828	G	A	non-synonymous	g3429	P	S
tig00000020_pilon_pilon_1586178	A	T	non-synonymous	g4405	F	L
tig00000023_pilon_pilon_1665013	T	A	non-CDS	g5787
tig00000023_pilon_pilon_1758570	C	T	non-synonymous	g5833	H	Y
tig00000035_pilon_pilon_368306	G	A	promoter	g7161
tig00000044_pilon_pilon_2390814	T	A	promoter	g9453
tig00000046_pilon_pilon_35098	G	A	intergenic-region
tig00000046_pilon_pilon_519078	C	A	non-synonymous	g9657	R	M
tig00000046_pilon_pilon_964953	G	A	intergenic-region
tig00000105_pilon_pilon_2268176	C	T	synonymous	g11486	F	F
tig00000107_pilon_pilon_1286439	T	A	non-CDS	g12248
tig00000117_pilon_pilon_898332	A	T	non-CDS	g13532
tig00000122_pilon_pilon_261870	A	T	non-synonymous	g15156	I	N
tig00000001_pilon_pilon_1339342	T	C	non-CDS	g564
tig00000011_pilon_pilon_2036166	C	T	non-synonymous	g2852	P	L
tig00000011_pilon_pilon_2036167	T	C	synonymous	g2852	P	P
tig00000011_pilon_pilon_3435317	A	G	non-synonymous	g3511	K	R
tig00000020_pilon_pilon_1045566	C	T	non-CDS	g4141
tig00000020_pilon_pilon_1957047	A	C	non-synonymous	g4582	V	G
tig00000020_pilon_pilon_2062226	C	T	non-synonymous	g4637	P	S
tig00000020_pilon_pilon_2072794	G	A	non-synonymous	g4643	P	L
tig00000020_pilon_pilon_2189497	G	A	non-synonymous	g4696	L	F
tig00000023_pilon_pilon_1212731	T	A	non-synonymous	g5600	L	*
tig00000023_pilon_pilon_1919190	G	A	synonymous	g5901	F	F
tig00000023_pilon_pilon_2211429	C	T	non-CDS	g6028
tig00000023_pilon_pilon_2347546	G	A	non-CDS	g6088
tig00000023_pilon_pilon_3083094	A	T	non-CDS	g6432
tig00000035_pilon_pilon_1577979	C	A	non-synonymous	g7669	F	L
tig00000044_pilon_pilon_192872	G	A	synonymous	g8489	S	S
tig00000044_pilon_pilon_549662	G	A	non-synonymous	g8648	Q	*
tig00000044_pilon_pilon_906616	A	G	intergenic-region
tig00000044_pilon_pilon_1848132	A	T	intergenic-region
tig00000048_pilon_pilon_123965	G	A	non-CDS	g10310
tig00000105_pilon_pilon_649779	C	T	intergenic-region
tig00000105_pilon_pilon_740426	A	T	non-CDS	g10808
tig00000105_pilon_pilon_1775694	T	A	promoter	g11273
tig00000105_pilon_pilon_1775695	G	C	promoter	g11273
tig00000105_pilon_pilon_2210121	T	C	intergenic-region
tig00000107_pilon_pilon_2070646	C	T	intergenic-region
tig00000113_pilon_pilon_59736	G	A	intergenic-region
tig00000113_pilon_pilon_147860	C	T	non-synonymous	g12987	Q	*
tig00000117_pilon_pilon_859393	G	A	synonymous	g13515	P	P
tig00000121_pilon_pilon_85727	T	C	synonymous	g13818	L	L
tig00000121_pilon_pilon_85738	T	C	synonymous	g13818	F	F
tig00000121_pilon_pilon_463354	C	A	non-CDS	g13966
tig00000121_pilon_pilon_620205	G	A	promoter	g14037
tig00000121_pilon_pilon_620209	G	A	promoter	g14037
tig00000121_pilon_pilon_1016866	G	A	intergenic-region
tig00000122_pilon_pilon_207269	G	A	non-synonymous	g15130	G	D
tig00000122_pilon_pilon_908935	G	A	non-synonymous	g15447	S	L
tig00000122_pilon_pilon_1092137	C	T	non-synonymous	g15536	Q	*
tig00000122_pilon_pilon_1567595	G	A	non-synonymous	g15762	S	F
tig00000122_pilon_pilon_2084108	G	A	synonymous	g15997	V	V
tig00000001_pilon_pilon_1456003	G	A	synonymous	g626	S	S
tig00000001_pilon_pilon_1456004	G	A	non-synonymous	g626	S	F
tig00000001_pilon_pilon_1955474	C	T	synonymous	g851	L	L
tig00000001_pilon_pilon_1955477	C	T	synonymous	g851	F	F
tig00000001_pilon_pilon_4236471	A	T	intergenic-region
tig00000011_pilon_pilon_828375	C	T	promoter	g2310
tig00000011_pilon_pilon_828376	T	C	promoter	g2310
tig00000011_pilon_pilon_1468352	G	A	non-CDS	g2578
tig00000011_pilon_pilon_1493039	C	T	non-synonymous	g2588	P	S
tig00000011_pilon_pilon_1548092	C	T	non-synonymous	g2610	P	L
tig00000011_pilon_pilon_1634367	G	A	promoter	g2651
tig00000011_pilon_pilon_1766840	C	A	non-CDS	g2718
tig00000011_pilon_pilon_1766842	G	T	non-CDS	g2718
tig00000011_pilon_pilon_1883713	C	A	synonymous	g2776	T	T
tig00000011_pilon_pilon_3298387	G	T	non-synonymous	g3445	A	D
tig00000011_pilon_pilon_3423282	A	C	non-synonymous	g3506	N	T
tig00000020_pilon_pilon_186148	C	A	non-synonymous	g3736	P	T
tig00000020_pilon_pilon_186149	C	T	non-synonymous	g3736	P	L
tig00000020_pilon_pilon_1028257	T	C	non-CDS	g4132
tig00000020_pilon_pilon_2612397	G	A	non-synonymous	g4890	L	F
tig00000020_pilon_pilon_2883370	G	A	intergenic-region
tig00000023_pilon_pilon_115696	C	T	intergenic-region
tig00000023_pilon_pilon_115697	T	C	intergenic-region
tig00000023_pilon_pilon_820579	G	A	non-synonymous	g5417	P	S
tig00000023_pilon_pilon_820580	G	A	synonymous	g5417	R	R
tig00000023_pilon_pilon_1525498	A	T	non-CDS	g5733
tig00000023_pilon_pilon_1525500	T	C	non-CDS	g5733
tig00000023_pilon_pilon_1531209	A	G	non-synonymous	g5736	K	E
tig00000023_pilon_pilon_2048028	G	A	promoter	g5954
tig00000023_pilon_pilon_2711691	A	G	intergenic-region
tig00000023_pilon_pilon_3611749	T	C	intergenic-region
tig00000025_pilon_pilon_25224	C	T	intergenic-region
tig00000035_pilon_pilon_956419	G	A	non-synonymous	g7416	P	S
tig00000035_pilon_pilon_1232069	G	A	synonymous	g7533	I	I
tig00000035_pilon_pilon_1565958	G	A	synonymous	g7665	L	L
tig00000035_pilon_pilon_2008213	C	T	synonymous	g7868	E	E
tig00000041_pilon_pilon_349753	C	T	non-synonymous	g8269	V	I
tig00000041_pilon_pilon_487698	G	A	non-synonymous	g8325	L	F
tig00000044_pilon_pilon_578219	C	T	synonymous	g8661	L	L
tig00000044_pilon_pilon_638458	A	G	non-CDS	g8680
tig00000044_pilon_pilon_638459	G	A	non-CDS	g8680
tig00000044_pilon_pilon_1070743	G	A	non-CDS	g8861
tig00000044_pilon_pilon_1668686	T	C	non-synonymous	g9126	Y	H
tig00000044_pilon_pilon_2100382	G	A	non-synonymous	g9312	G	E
tig00000044_pilon_pilon_2201314	A	T	non-synonymous	g9356	N	K
tig00000044_pilon_pilon_2201315	T	C	non-synonymous	g9356	N	S
tig00000046_pilon_pilon_310869	C	T	non-synonymous	g9578	G	R
tig00000046_pilon_pilon_627759	C	T	non-synonymous	g9699	D	N
tig00000046_pilon_pilon_627763	C	T	synonymous	g9699	R	R
tig00000046_pilon_pilon_852021	C	T	non-synonymous	g9797	A	V
tig00000046_pilon_pilon_1704104	G	A	non-synonymous	g10162	R	C
tig00000105_pilon_pilon_133730	C	T	non-synonymous	g10559	V	M
tig00000105_pilon_pilon_261733	C	T	non-synonymous	g10602	L	F
tig00000105_pilon_pilon_905847	G	T	non-synonymous	g10882	P	Q
tig00000105_pilon_pilon_905848	G	A	non-synonymous	g10882	P	S
tig00000105_pilon_pilon_905852	G	A	synonymous	g10882	T	T
tig00000105_pilon_pilon_1428797	C	T	non-synonymous	g11117	H	Y
tig00000105_pilon_pilon_1787252	C	T	synonymous	g11279	F	F
tig00000105_pilon_pilon_1787253	C	T	synonymous	g11279	L	L
tig00000105_pilon_pilon_2423605	C	T	non-synonymous	g11549	W	*
tig00000105_pilon_pilon_2467505	C	T	intergenic-region
tig00000105_pilon_pilon_2571595	C	T	non-synonymous	g11598	D	N
tig00000105_pilon_pilon_2571607	T	C	non-synonymous	g11598	K	E
tig00000107_pilon_pilon_1807418	G	A	non-synonymous	g12485	P	L
tig00000107_pilon_pilon_1807419	G	A	non-synonymous	g12485	P	S
tig00000117_pilon_pilon_180350	G	A	synonymous	g13207	G	G
tig00000118_pilon_pilon_53591	C	T	non-CDS	g13693
tig00000118_pilon_pilon_53592	C	T	non-CDS	g13693
tig00000121_pilon_pilon_260994	T	A	intergenic-region
tig00000121_pilon_pilon_260995	A	T	intergenic-region
tig00000121_pilon_pilon_585043	G	A	promoter	g14023
tig00000121_pilon_pilon_1849898	C	T	non-synonymous	g14564	A	T
tig00000122_pilon_pilon_371579	C	T	intergenic-region
tig00000122_pilon_pilon_371580	C	T	intergenic-region
tig00000122_pilon_pilon_431671	C	T	non-synonymous	g15240	T	I
tig00000122_pilon_pilon_431672	C	T	synonymous	g15240	T	T
tig00000122_pilon_pilon_732127	G	A	non-CDS	g15372
tig00000122_pilon_pilon_1478996	A	C	promoter	g15719
tig00000122_pilon_pilon_2055306	C	T	synonymous	g15981	F	F
tig00000122_pilon_pilon_2403073	C	T	synonymous	g16122	L	L
tig00000122_pilon_pilon_2455914	T	C	intergenic-region
tig00000122_pilon_pilon_2573546	G	A	non-synonymous	g16199	L	F
tig00000124_pilon_pilon_7010	G	A	non-synonymous	g16282	G	E
tig00000001_pilon_pilon_369386	C	T	non-synonymous	g145	E	K
tig00000001_pilon_pilon_369410	C	T	non-synonymous	g145	G	R
tig00000001_pilon_pilon_1827639	C	G	non-synonymous	g795	P	A
tig00000001_pilon_pilon_2240543	C	G	non-synonymous	g989	S	R
tig00000001_pilon_pilon_2240544	A	G	non-synonymous	g989	R	G
tig00000011_pilon_pilon_1042281	T	C	intergenic-region
tig00000011_pilon_pilon_2839393	T	G	promoter	g3224
tig00000020_pilon_pilon_827812	T	C	non-synonymous	g4041	I	V
tig00000020_pilon_pilon_1344758	T	A	non-synonymous	g4289	I	N
tig00000020_pilon_pilon_1518686	A	G	non-synonymous	g4365	L	S
tig00000023_pilon_pilon_951247	G	A	synonymous	g5478	D	D
tig00000035_pilon_pilon_2560799	A	T	intergenic-region
tig00000041_pilon_pilon_101951	A	G	synonymous	g8180	R	R
tig00000044_pilon_pilon_273034	G	A	non-synonymous	g8527	G	E
tig00000044_pilon_pilon_1162732	G	A	synonymous	g8908	I	I
tig00000044_pilon_pilon_2138258	C	T	synonymous	g9330	F	F
tig00000044_pilon_pilon_2138259	A	G	non-synonymous	g9330	I	V
tig00000105_pilon_pilon_1247542	C	T	synonymous	g11037	Y	Y
tig00000105_pilon_pilon_1505567	C	T	non-synonymous	g11148	S	L
tig00000105_pilon_pilon_1663192	A	G	synonymous	g11219	Q	Q
tig00000105_pilon_pilon_1668739	C	T	non-synonymous	g11222	P	L
tig00000105_pilon_pilon_1668740	C	T	synonymous	g11222	P	P
tig00000107_pilon_pilon_1188994	A	C	non-synonymous	g12219	I	S
tig00000113_pilon_pilon_271479	C	T	non-synonymous	g13036	P	S
tig00000113_pilon_pilon_271480	C	T	non-synonymous	g13036	P	L
tig00000117_pilon_pilon_181730	T	C	synonymous	g13208	L	L
tig00000117_pilon_pilon_656048	C	T	non-CDS	g13416
tig00000118_pilon_pilon_198750	T	C	intergenic-region
tig00000122_pilon_pilon_1363416	C	T	synonymous	g15666	L	L
tig00000122_pilon_pilon_1530621	A	G	non-CDS	g15744
tig00000011_pilon_pilon_79018	T	C	non-CDS	g1994
tig00000011_pilon_pilon_213913	G	A	non-CDS	g2046
tig00000011_pilon_pilon_438427	C	T	synonymous	g2144	P	P
tig00000011_pilon_pilon_2619023	T	A	non-synonymous	g3128	Y	F
tig00000011_pilon_pilon_3222062	T	C	intergenic-region
tig00000011_pilon_pilon_3222066	A	G	intergenic-region
tig00000011_pilon_pilon_3399608	G	A	non-CDS	g3496
tig00000020_pilon_pilon_1045578	T	C	non-CDS	g4141
tig00000020_pilon_pilon_1518381	G	A	non-CDS	g4365
tig00000020_pilon_pilon_1792089	C	T	non-synonymous	g4504	G	S
tig00000023_pilon_pilon_881603	C	A	non-CDS	g5444
tig00000023_pilon_pilon_1988735	A	G	intergenic-region
tig00000023_pilon_pilon_2023152	A	C	synonymous	g5943	V	V
tig00000023_pilon_pilon_3008496	C	T	non-CDS	g6400
tig00000023_pilon_pilon_3088313	A	C	intergenic-region
tig00000030_pilon_pilon_379985	A	C	non-CDS	g6983
tig00000035_pilon_pilon_614141	A	G	non-CDS	g7263
tig00000035_pilon_pilon_2365394	C	T	non-synonymous	g8032	T	I
tig00000044_pilon_pilon_805980	T	C	non-CDS	g8750
tig00000044_pilon_pilon_2142564	C	T	non-synonymous	g9332	G	S
tig00000046_pilon_pilon_90809	C	A	non-synonymous	g9496	P	Q
tig00000046_pilon_pilon_591484	A	G	intergenic-region
tig00000046_pilon_pilon_1135558	C	T	promoter	g9915
tig00000046_pilon_pilon_1709825	G	A	synonymous	g10164	F	F
tig00000105_pilon_pilon_221152	T	C	non-synonymous	g10589	L	P
tig00000105_pilon_pilon_528859	C	T	intergenic-region
tig00000107_pilon_pilon_444159	C	T	promoter	g11900
tig00000107_pilon_pilon_616935	G	A	promoter	g11976
tig00000107_pilon_pilon_1698206	T	C	non-CDS	g12447
tig00000113_pilon_pilon_336364	A	G	intergenic-region
tig00000117_pilon_pilon_903434	C	T	intergenic-region
tig00000121_pilon_pilon_532245	G	A	synonymous	g14000	V	V
tig00000121_pilon_pilon_1255935	G	A	non-CDS	g14325
tig00000121_pilon_pilon_1560479	C	T	synonymous	g14445	L	L
tig00000122_pilon_pilon_256315	G	A	promoter	g15154
tig00000122_pilon_pilon_262124	G	A	synonymous	g15156	S	S
tig00000122_pilon_pilon_262125	G	A	non-synonymous	g15156	S	F
tig00000122_pilon_pilon_2168166	C	T	non-CDS	g16036
tig00000122_pilon_pilon_2513246	T	C	intergenic-region
tig00000011_pilon_pilon_546408	G	A	non-synonymous	g2194	R	*
tig00000011_pilon_pilon_1166692	C	T	non-synonymous	g2451	P	L
tig00000011_pilon_pilon_1805044	T	A	non-synonymous	g2737	F	I
tig00000020_pilon_pilon_302934	A	T	non-synonymous	g3788	Y	F
tig00000020_pilon_pilon_738761	C	T	synonymous	g3992	E	E
tig00000020_pilon_pilon_738763	C	T	non-synonymous	g3992	E	K
tig00000023_pilon_pilon_884035	T	A	non-CDS	g5446
tig00000023_pilon_pilon_2972653	G	T	non-synonymous	g6376	P	Q
tig00000044_pilon_pilon_512557	C	T	synonymous	g8627	H	H
tig00000044_pilon_pilon_1683442	G	A	non-synonymous	g9133	S	L
tig00000046_pilon_pilon_525496	C	T	non-synonymous	g9661	D	N
tig00000046_pilon_pilon_635771	A	T	non-CDS	g9701
tig00000046_pilon_pilon_765621	T	A	intergenic-region
tig00000105_pilon_pilon_2155738	G	A	promoter	g11436
tig00000105_pilon_pilon_2217718	T	A	non-synonymous	g11464	L	*
tig00000115_pilon_pilon_27775	G	A	intergenic-region
tig00000117_pilon_pilon_343607	G	T	intergenic-region
tig00000118_pilon_pilon_222461	C	T	non-CDS	g13758
tig00000121_pilon_pilon_563566	C	T	intergenic-region
tig00000001_pilon_pilon_1756705	C	T	non-synonymous	g766	R	Q
tig00000001_pilon_pilon_3016584	C	T	non-CDS	g1310
tig00000001_pilon_pilon_3195521	G	A	non-synonymous	g1389	S	F
tig00000001_pilon_pilon_4202239	C	T	non-synonymous	g1843	P	L
tig00000001_pilon_pilon_4202240	A	T	synonymous	g1843	P	P
tig00000011_pilon_pilon_1540500	G	A	synonymous	g2608	P	P
tig00000011_pilon_pilon_2106779	G	A	synonymous	g2887	V	V
tig00000011_pilon_pilon_2245707	C	T	non-CDS	g2954
tig00000011_pilon_pilon_2578225	A	T	non-synonymous	g3108	F	I
tig00000020_pilon_pilon_2333264	C	T	non-synonymous	g4762	D	N
tig00000020_pilon_pilon_2491359	C	T	intergenic-region
tig00000020_pilon_pilon_2790187	T	C	non-synonymous	g4970	N	S
tig00000020_pilon_pilon_2858990	C	A	intergenic-region
tig00000023_pilon_pilon_780955	C	T	synonymous	g5401	L	L
tig00000023_pilon_pilon_1458748	G	A	synonymous	g5702	L	L
tig00000023_pilon_pilon_1932466	A	C	non-CDS	g5903
tig00000023_pilon_pilon_3557791	C	T	non-synonymous	g6630	P	L
tig00000030_pilon_pilon_429952	C	T	intergenic-region
tig00000035_pilon_pilon_760216	G	A	non-synonymous	g7324	S	L
tig00000035_pilon_pilon_872002	C	T	non-synonymous	g7380	D	N
tig00000035_pilon_pilon_2348330	G	A	promoter	g8025
tig00000044_pilon_pilon_994664	G	A	non-CDS	g8832
tig00000044_pilon_pilon_1425761	G	A	intergenic-region
tig00000046_pilon_pilon_947710	A	T	intergenic-region
tig00000054_pilon_pilon_326655	C	T	non-CDS	g10489
tig00000105_pilon_pilon_653735	T	A	intergenic-region
tig00000107_pilon_pilon_2014716	G	A	non-synonymous	g12565	W	*
tig00000107_pilon_pilon_2071748	C	T	non-synonymous	g12588	S	L
tig00000118_pilon_pilon_67934	C	T	intergenic-region
tig00000121_pilon_pilon_122155	G	A	synonymous	g13835	P	P
tig00000121_pilon_pilon_122157	T	G	non-synonymous	g13835	I	S
tig00000121_pilon_pilon_1465367	G	A	synonymous	g14417	E	E
tig00000121_pilon_pilon_2359267	C	T	synonymous	g14756	P	P
tig00000122_pilon_pilon_230865	C	A	promoter	g15138
tig00000001_pilon_pilon_2198746	A	T	non-synonymous	g968	I	N
tig00000001_pilon_pilon_2440593	A	T	intergenic-region
tig00000001_pilon_pilon_3115049	A	G	non-synonymous	g1354	K	E
tig00000011_pilon_pilon_36120	C	G	non-CDS	g1979
tig00000011_pilon_pilon_571876	C	T	synonymous	g2203	T	T
tig00000011_pilon_pilon_695415	A	G	intergenic-region
tig00000011_pilon_pilon_1733342	C	T	non-synonymous	g2697	L	F
tig00000011_pilon_pilon_2723582	G	A	intergenic-region
tig00000011_pilon_pilon_2890289	G	A	intergenic-region
tig00000020_pilon_pilon_1479489	T	C	intergenic-region
tig00000020_pilon_pilon_2344203	A	T	intergenic-region
tig00000023_pilon_pilon_1108356	C	T	synonymous	g5555	L	L
tig00000023_pilon_pilon_3170649	G	A	non-synonymous	g6464	V	I
tig00000023_pilon_pilon_3285335	A	T	promoter	g6511
tig00000030_pilon_pilon_434206	C	T	synonymous	g7008	L	L
tig00000035_pilon_pilon_587556	T	C	non-synonymous	g7249	S	P
tig00000041_pilon_pilon_285829	G	A	promoter	g8245
tig00000044_pilon_pilon_1786783	G	A	intergenic-region
tig00000046_pilon_pilon_1687142	T	A	non-synonymous	g10154	D	E
tig00000046_pilon_pilon_1784741	T	A	promoter	g10188
tig00000054_pilon_pilon_20506	T	C	intergenic-region
tig00000105_pilon_pilon_1282610	C	T	synonymous	g11050	L	L
tig00000105_pilon_pilon_1881329	C	T	non-synonymous	g11324	S	N
tig00000105_pilon_pilon_2390257	G	A	synonymous	g11536	E	E
tig00000105_pilon_pilon_2424923	G	A	non-synonymous	g11550	L	F
tig00000107_pilon_pilon_2138282	C	T	synonymous	g12615	G	G
tig00000117_pilon_pilon_426660	C	T	non-synonymous	g13320	T	I
tig00000117_pilon_pilon_655879	T	C	synonymous	g13416	L	L
tig00000117_pilon_pilon_992956	A	T	non-synonymous	g13583	Y	F
tig00000121_pilon_pilon_355928	C	T	non-CDS	g13923
tig00000121_pilon_pilon_1002748	G	A	non-CDS	g14213
tig00000122_pilon_pilon_223686	G	A	non-CDS	g15136
tig00000122_pilon_pilon_1047999	A	T	non-synonymous	g15513	Y	N
tig00000122_pilon_pilon_1492902	A	G	non-CDS	g15726
tig00000122_pilon_pilon_1510328	C	T	non-CDS	g15736
tig00000122_pilon_pilon_2493511	C	T	non-synonymous	g16161	G	E
tig00000001_pilon_pilon_1363317	A	G	non-synonymous	g577	F	L
tig00000011_pilon_pilon_1220925	G	A	non-synonymous	g2477	S	F
tig00000011_pilon_pilon_2877129	G	A	non-synonymous	g3242	A	V
tig00000020_pilon_pilon_1715617	C	T	non-CDS	g4469
tig00000020_pilon_pilon_2491978	T	C	intergenic-region
tig00000023_pilon_pilon_623644	C	T	non-synonymous	g5344	T	I
tig00000035_pilon_pilon_111205	A	T	intergenic-region
tig00000035_pilon_pilon_654335	T	C	non-synonymous	g7282	K	E
tig00000035_pilon_pilon_1568245	C	T	non-synonymous	g7666	P	S
tig00000044_pilon_pilon_1512160	T	C	non-synonymous	g9063	N	S
tig00000046_pilon_pilon_626718	G	T	non-synonymous	g9699	Q	K
tig00000105_pilon_pilon_843315	C	T	synonymous	g10849	F	F
tig00000105_pilon_pilon_1649192	C	T	non-CDS	g11215
tig00000107_pilon_pilon_237309	G	A	non-synonymous	g11804	P	L
tig00000107_pilon_pilon_1165876	C	T	non-synonymous	g12213	P	L
tig00000107_pilon_pilon_2019490	A	T	intergenic-region
tig00000117_pilon_pilon_369327	G	A	non-synonymous	g13290	P	S
tig00000121_pilon_pilon_937045	T	C	non-synonymous	g14184	F	L
tig00000122_pilon_pilon_1400726	C	T	non-synonymous	g15680	R	C
tig00000122_pilon_pilon_2218598	T	C	non-synonymous	g16055	I	M
tig00000001_pilon_pilon_471196	A	G	non-CDS	g183
tig00000001_pilon_pilon_1654112	A	G	promoter	g720
tig00000001_pilon_pilon_2983425	G	A	non-synonymous	g1299	W	*
tig00000001_pilon_pilon_2983426	G	A	non-synonymous	g1299	E	K
tig00000001_pilon_pilon_3646514	C	A	synonymous	g1590	L	L
tig00000011_pilon_pilon_2015189	C	T	synonymous	g2841	F	F
tig00000020_pilon_pilon_1337991	C	T	non-synonymous	g4286	V	I
tig00000020_pilon_pilon_2484049	G	A	non-synonymous	g4833	P	S
tig00000020_pilon_pilon_2578970	C	T	synonymous	g4873	A	A
tig00000023_pilon_pilon_1711287	G	A	non-synonymous	g5810	Q	*
tig00000023_pilon_pilon_2927040	C	T	synonymous	g6356	K	K
tig00000023_pilon_pilon_3228299	C	T	non-synonymous	g6487	P	S
tig00000023_pilon_pilon_3482952	A	G	synonymous	g6598	I	I
tig00000030_pilon_pilon_175005	G	A	non-CDS	g6887
tig00000035_pilon_pilon_1720416	C	T	intergenic-region
tig00000046_pilon_pilon_10608	A	G	synonymous	g9459	P	P
tig00000046_pilon_pilon_10609	G	A	non-synonymous	g9459	P	L
tig00000046_pilon_pilon_1963016	T	C	non-synonymous	g10271	L	P
tig00000105_pilon_pilon_1011019	T	C	promoter	g10926
tig00000105_pilon_pilon_1213368	C	T	intergenic-region
tig00000105_pilon_pilon_2033748	G	A	non-synonymous	g11385	P	S
tig00000107_pilon_pilon_576553	C	G	non-synonymous	g11957	M	I
tig00000107_pilon_pilon_828469	C	T	synonymous	g12076	L	L
tig00000115_pilon_pilon_79161	G	A	promoter	g13109
tig00000117_pilon_pilon_292359	C	A	intergenic-region
tig00000122_pilon_pilon_328851	A	G	synonymous	g15193	P	P
tig00000124_pilon_pilon_84978	A	T	intergenic-region
tig00000001_pilon_pilon_2159600	C	T	non-synonymous	g948	D	N
tig00000001_pilon_pilon_2159601	C	T	synonymous	g948	V	V
tig00000001_pilon_pilon_2286770	T	A	non-synonymous	g1008	S	T
tig00000001_pilon_pilon_3212549	G	A	synonymous	g1396	F	F
tig00000001_pilon_pilon_4114073	C	T	non-synonymous	g1802	P	S
tig00000011_pilon_pilon_381302	C	T	non-synonymous	g2117	S	L
tig00000011_pilon_pilon_1285563	C	T	non-synonymous	g2505	S	F
tig00000011_pilon_pilon_3274403	C	T	promoter	g3432
tig00000011_pilon_pilon_3369122	G	A	promoter	g3480
tig00000020_pilon_pilon_1387905	A	T	non-synonymous	g4305	I	F
tig00000023_pilon_pilon_438137	T	C	non-synonymous	g5253	L	S
tig00000023_pilon_pilon_3376718	G	A	synonymous	g6551	T	T
tig00000044_pilon_pilon_883294	G	A	non-CDS	g8783
tig00000044_pilon_pilon_1274210	C	T	non-CDS	g8960
tig00000044_pilon_pilon_1274211	T	C	non-CDS	g8960
tig00000044_pilon_pilon_1875071	T	A	intergenic-region
tig00000044_pilon_pilon_1890086	A	T	non-CDS	g9220
tig00000046_pilon_pilon_934232	C	T	non-CDS	g9833
tig00000046_pilon_pilon_1895930	C	A	non-CDS	g10239
tig00000054_pilon_pilon_17166	G	T	synonymous	g10342	I	I
tig00000105_pilon_pilon_1665255	G	A	non-synonymous	g11221	S	F
tig00000105_pilon_pilon_2250556	C	T	synonymous	g11477	L	L
tig00000107_pilon_pilon_54634	G	A	non-CDS	g11708
tig00000107_pilon_pilon_1125345	T	C	non-synonymous	g12200	I	V
tig00000107_pilon_pilon_1132900	G	T	synonymous	g12203	T	T
tig00000108_pilon_pilon_87782	G	A	non-synonymous	g12752	P	S
tig00000117_pilon_pilon_468236	C	T	synonymous	g13331	A	A
tig00000117_pilon_pilon_1079497	T	C	non-CDS	g13617
tig00000118_pilon_pilon_50724	G	A	intergenic-region
tig00000121_pilon_pilon_859199	T	A	intergenic-region
tig00000121_pilon_pilon_859205	G	T	intergenic-region
tig00000121_pilon_pilon_1310798	C	T	non-synonymous	g14348	E	K
tig00000122_pilon_pilon_2661460	A	G	non-CDS	g16240
tig00000001_pilon_pilon_1745092	C	T	intergenic-region
tig00000001_pilon_pilon_3363077	C	T	non-synonymous	g1467	R	*
tig00000001_pilon_pilon_3409850	A	G	promoter	g1484
tig00000001_pilon_pilon_3409851	T	C	promoter	g1484
tig00000001_pilon_pilon_4040880	C	T	non-CDS	g1765
tig00000011_pilon_pilon_2074936	C	T	intergenic-region
tig00000011_pilon_pilon_2181568	A	G	non-CDS	g2925
tig00000011_pilon_pilon_3345459	G	A	promoter	g3467
tig00000020_pilon_pilon_124810	T	A	non-synonymous	g3702	K	N
tig00000020_pilon_pilon_2176221	G	A	non-CDS	g4689
tig00000030_pilon_pilon_407396	T	A	non-CDS	g6995
tig00000035_pilon_pilon_18587	A	G	synonymous	g7015	Q	Q
tig00000035_pilon_pilon_602010	G	A	non-synonymous	g7257	L	F
tig00000035_pilon_pilon_1859774	A	G	synonymous	g7796	G	G
tig00000044_pilon_pilon_1144128	G	T	non-synonymous	g8900	W	L
tig00000046_pilon_pilon_673721	C	T	intergenic-region
tig00000046_pilon_pilon_706871	G	A	synonymous	g9727	L	L
tig00000046_pilon_pilon_899830	C	G	non-synonymous	g9820	I	M
tig00000046_pilon_pilon_1606468	G	A	non-synonymous	g10117	L	F
tig00000048_pilon_pilon_153823	C	G	synonymous	g10318	G	G
tig00000105_pilon_pilon_1905116	T	G	non-synonymous	g11336	K	T
tig00000105_pilon_pilon_1905117	T	A	non-synonymous	g11336	K	*
tig00000105_pilon_pilon_2325280	C	T	synonymous	g11507	T	T
tig00000105_pilon_pilon_2445169	C	T	non-synonymous	g11554	S	L
tig00000105_pilon_pilon_2572608	C	T	intergenic-region
tig00000107_pilon_pilon_270507	T	A	non-synonymous	g11825	K	I
tig00000107_pilon_pilon_349050	T	A	non-synonymous	g11858	*	C
tig00000107_pilon_pilon_442501	G	A	intergenic-region
tig00000107_pilon_pilon_1169741	C	T	non-CDS	g12214
tig00000113_pilon_pilon_267827	A	T	intergenic-region
tig00000113_pilon_pilon_267829	G	A	intergenic-region
tig00000115_pilon_pilon_22111	C	T	intergenic-region
tig00000117_pilon_pilon_925584	G	T	non-synonymous	g13546	L	I
tig00000117_pilon_pilon_1115755	A	G	promoter	g13636
tig00000121_pilon_pilon_1386331	G	A	synonymous	g14379	F	F
tig00000121_pilon_pilon_1404930	G	A	promoter	g14387
tig00000121_pilon_pilon_2398303	C	A	non-synonymous	g14774	K	N
tig00000121_pilon_pilon_2398304	T	A	non-synonymous	g14774	K	M
tig00000001_pilon_pilon_4418094	G	A	non-synonymous	g1943	G	S
tig00000011_pilon_pilon_439785	G	T	promoter	g2145
tig00000044_pilon_pilon_2037755	G	A	synonymous	g9287	N	N
tig00000105_pilon_pilon_992606	G	A	synonymous	g10921	*	*
tig00000105_pilon_pilon_1255271	A	T	non-synonymous	g11041	F	I
tig00000105_pilon_pilon_2479380	G	T	non-synonymous	g11568	G	*
tig00000107_pilon_pilon_787755	T	G	synonymous	g12062	G	G
tig00000121_pilon_pilon_1391528	C	T	non-synonymous	g14381	E	K
tig00000122_pilon_pilon_864419	C	T	non-synonymous	g15431	G	E
tig00000122_pilon_pilon_2143815	A	T	non-synonymous	g16023	K	*
tig00000001_pilon_pilon_3481370	G	A	promoter	g1519
tig00000001_pilon_pilon_3587337	A	G	non-synonymous	g1562	Y	H
tig00000011_pilon_pilon_2638043	A	T	non-synonymous	g3137	K	*
tig00000023_pilon_pilon_635611	C	T	non-CDS	g5349
tig00000023_pilon_pilon_635612	C	T	non-CDS	g5349
tig00000023_pilon_pilon_1823530	A	G	synonymous	g5862	I	I
tig00000023_pilon_pilon_2306620	C	T	non-synonymous	g6067	A	V
tig00000023_pilon_pilon_3517592	G	A	non-CDS	g6611
tig00000054_pilon_pilon_191894	A	G	intergenic-region
tig00000054_pilon_pilon_283860	A	C	non-CDS	g10473
tig00000105_pilon_pilon_531560	T	C	intergenic-region
tig00000107_pilon_pilon_1596631	A	T	intergenic-region
tig00000121_pilon_pilon_529938	C	T	synonymous	g13999	F	F
tig00000121_pilon_pilon_1238076	G	A	non-synonymous	g14315	S	L
tig00000121_pilon_pilon_1430510	C	T	synonymous	g14401	S	S
tig00000121_pilon_pilon_2825277	C	T	intergenic-region
tig00000122_pilon_pilon_519105	A	T	non-synonymous	g15275	Y	*
tig00000122_pilon_pilon_994108	A	G	non-synonymous	g15485	F	L
tig00000122_pilon_pilon_1713339	C	T	non-synonymous	g15826	E	K
tig00000124_pilon_pilon_18406	A	T	non-synonymous	g16286	*	C
tig00000001_pilon_pilon_2983914	C	T	intergenic-region
tig00000001_pilon_pilon_3911215	G	A	synonymous	g1705	D	D
tig00000011_pilon_pilon_2994700	G	A	non-synonymous	g3305	S	F
tig00000023_pilon_pilon_111123	G	A	intergenic-region
tig00000023_pilon_pilon_142534	A	C	intergenic-region
tig00000023_pilon_pilon_195585	A	G	non-CDS	g5128
tig00000023_pilon_pilon_1331211	C	T	non-synonymous	g5650	D	N
tig00000023_pilon_pilon_3434063	C	T	non-CDS	g6579
tig00000023_pilon_pilon_3718706	G	A	intergenic-region
tig00000025_pilon_pilon_62894	C	T	intergenic-region
tig00000035_pilon_pilon_1439582	A	G	intergenic-region
tig00000035_pilon_pilon_1511043	C	T	non-synonymous	g7643	R	K
tig00000035_pilon_pilon_2049424	C	T	synonymous	g7890	K	K
tig00000035_pilon_pilon_2178775	G	A	intergenic-region
tig00000041_pilon_pilon_18860	A	G	synonymous	g8159	A	A
tig00000041_pilon_pilon_537833	G	A	synonymous	g8351	I	I
tig00000046_pilon_pilon_629494	G	A	synonymous	g9699	P	P
tig00000046_pilon_pilon_940706	G	A	synonymous	g9836	T	T
tig00000046_pilon_pilon_940747	G	A	non-synonymous	g9836	L	F
tig00000105_pilon_pilon_205061	T	C	intergenic-region
tig00000105_pilon_pilon_1815332	C	A	intergenic-region
tig00000105_pilon_pilon_2636382	C	T	promoter	g11624
tig00000107_pilon_pilon_949107	C	T	non-synonymous	g12130	S	L
tig00000107_pilon_pilon_1459650	G	A	intergenic-region
tig00000113_pilon_pilon_24324	G	A	non-CDS	g12936
tig00000113_pilon_pilon_228821	G	A	promoter	g13017
tig00000113_pilon_pilon_319577	G	A	non-synonymous	g13059	E	K
tig00000117_pilon_pilon_580421	G	A	intergenic-region
tig00000121_pilon_pilon_1451006	C	T	non-synonymous	g14409	M	I
tig00000121_pilon_pilon_2358026	C	T	intergenic-region
tig00000121_pilon_pilon_2375733	T	C	non-synonymous	g14765	L	S
tig00000122_pilon_pilon_1734604	G	A	non-synonymous	g15835	G	R
tig00000001_pilon_pilon_1875113	C	T	non-synonymous	g815	E	K
tig00000001_pilon_pilon_4188956	G	A	non-synonymous	g1838	A	V
tig00000011_pilon_pilon_1081345	C	T	non-synonymous	g2414	L	F
tig00000011_pilon_pilon_2152389	A	G	synonymous	g2912	A	A
tig00000011_pilon_pilon_2285638	A	G	non-synonymous	g2971	S	P
tig00000023_pilon_pilon_58185	T	G	intergenic-region
tig00000023_pilon_pilon_3112461	T	A	non-CDS	g6442
tig00000035_pilon_pilon_655795	A	G	intergenic-region
tig00000041_pilon_pilon_270300	G	A	non-synonymous	g8240	S	F
tig00000041_pilon_pilon_549156	C	T	intergenic-region
tig00000041_pilon_pilon_549157	C	T	intergenic-region
tig00000044_pilon_pilon_1869323	G	A	non-synonymous	g9211	S	F
tig00000046_pilon_pilon_1135962	T	C	non-synonymous	g9915	Y	H
tig00000046_pilon_pilon_1240159	T	A	non-synonymous	g9958	L	H
tig00000054_pilon_pilon_114265	G	A	non-synonymous	g10390	L	F
tig00000105_pilon_pilon_1981489	A	G	intergenic-region
tig00000105_pilon_pilon_1981490	G	A	intergenic-region
tig00000107_pilon_pilon_2253586	T	C	non-synonymous	g12678	I	T
tig00000122_pilon_pilon_1525881	T	C	non-CDS	g15742
tig00000001_pilon_pilon_2665058	C	T	promoter	g1166
tig00000020_pilon_pilon_754184	G	T	promoter	g3999
tig00000023_pilon_pilon_92902	A	G	intergenic-region
tig00000023_pilon_pilon_180591	G	T	promoter	g5123
tig00000023_pilon_pilon_969838	C	T	synonymous	g5488	L	L
tig00000046_pilon_pilon_1681807	C	T	non-synonymous	g10152	A	T
tig00000117_pilon_pilon_1031435	G	A	non-CDS	g13598
tig00000121_pilon_pilon_2237226	C	T	non-synonymous	g14711	A	V
tig00000122_pilon_pilon_634573	C	T	non-synonymous	g15323	L	F
tig00000001_pilon_pilon_2382502	A	T	non-synonymous	g1049	K	N
tig00000011_pilon_pilon_554856	A	T	promoter	g2197
tig00000011_pilon_pilon_1076449	T	C	non-CDS	g2412
tig00000020_pilon_pilon_1916215	G	T	non-CDS	g4562
tig00000020_pilon_pilon_2479226	G	A	non-synonymous	g4832	P	L
tig00000023_pilon_pilon_1894560	C	T	synonymous	g5891	D	D
tig00000023_pilon_pilon_2298166	A	G	promoter	g6063
tig00000023_pilon_pilon_2298168	G	A	promoter	g6063
tig00000030_pilon_pilon_160286	C	T	synonymous	g6878	F	F
tig00000030_pilon_pilon_253760	T	A	non-CDS	g6926
tig00000046_pilon_pilon_666837	T	C	intergenic-region
tig00000105_pilon_pilon_417249	A	G	intergenic-region
tig00000105_pilon_pilon_425648	G	A	intergenic-region
tig00000105_pilon_pilon_1877307	G	A	non-synonymous	g11322	D	N
tig00000107_pilon_pilon_631586	G	A	non-synonymous	g11984	L	F
tig00000107_pilon_pilon_1606076	T	C	synonymous	g12408	I	I
tig00000107_pilon_pilon_2319504	A	G	non-synonymous	g12710	F	S
tig00000118_pilon_pilon_156895	C	T	non-CDS	g13732
tig00000121_pilon_pilon_1152747	G	A	non-CDS	g14282
tig00000122_pilon_pilon_669349	A	G	non-synonymous	g15340	L	S
tig00000122_pilon_pilon_1153488	A	T	promoter	g15571
tig00000122_pilon_pilon_1472475	G	A	synonymous	g15715	H	H
tig00000001_pilon_pilon_115851	G	A	synonymous	g40	T	T
tig00000001_pilon_pilon_115852	G	A	non-synonymous	g40	T	I
tig00000001_pilon_pilon_2096024	G	A	non-CDS	g917
tig00000001_pilon_pilon_2664400	G	T	non-synonymous	g1166	T	K
tig00000011_pilon_pilon_1595146	C	T	synonymous	g2629	T	T
tig00000011_pilon_pilon_2314304	C	T	synonymous	g2983	A	A
tig00000011_pilon_pilon_3533123	C	T	intergenic-region
tig00000020_pilon_pilon_67995	C	T	intergenic-region
tig00000020_pilon_pilon_1676481	G	T	intergenic-region
tig00000020_pilon_pilon_2207862	C	T	promoter	g4703
tig00000023_pilon_pilon_1983217	C	T	promoter	g5926
tig00000023_pilon_pilon_3051831	G	A	non-synonymous	g6419	G	R
tig00000023_pilon_pilon_3230023	G	T	non-synonymous	g6488	S	Y
tig00000023_pilon_pilon_3271994	C	T	non-synonymous	g6502	R	Q
tig00000030_pilon_pilon_34359	C	T	non-synonymous	g6826	P	L
tig00000030_pilon_pilon_265109	C	T	non-CDS	g6930
tig00000035_pilon_pilon_1028874	C	G	non-synonymous	g7449	P	A
tig00000041_pilon_pilon_367540	G	A	intergenic-region
tig00000041_pilon_pilon_367541	G	T	intergenic-region
tig00000105_pilon_pilon_531996	A	T	non-synonymous	g10714	N	Y
tig00000105_pilon_pilon_1302218	A	T	non-synonymous	g11059	H	Q
tig00000105_pilon_pilon_2078736	G	A	synonymous	g11402	L	L
tig00000105_pilon_pilon_2078737	T	A	non-synonymous	g11402	Y	N
tig00000121_pilon_pilon_476627	G	A	non-CDS	g13972
tig00000122_pilon_pilon_1863060	T	A	promoter	g15892
tig00000122_pilon_pilon_2491350	C	T	non-synonymous	g16161	D	N
tig00000001_pilon_pilon_1415000	G	A	non-synonymous	g605	A	V
tig00000001_pilon_pilon_3580641	C	T	synonymous	g1559	V	V
tig00000011_pilon_pilon_425947	G	T	non-synonymous	g2139	M	I
tig00000011_pilon_pilon_560616	A	C	non-synonymous	g2199	N	H
tig00000011_pilon_pilon_1509390	T	C	non-synonymous	g2595	K	R
tig00000011_pilon_pilon_2928115	G	A	non-synonymous	g3275	E	K
tig00000020_pilon_pilon_418025	G	A	intergenic-region
tig00000020_pilon_pilon_418026	G	A	intergenic-region
tig00000023_pilon_pilon_2492010	C	T	non-CDS	g6155
tig00000035_pilon_pilon_699718	A	G	non-synonymous	g7297	S	P
tig00000035_pilon_pilon_1734932	G	A	non-synonymous	g7738	R	C
tig00000035_pilon_pilon_1788120	T	C	intergenic-region
tig00000035_pilon_pilon_2201263	G	T	intergenic-region
tig00000041_pilon_pilon_328242	A	G	non-CDS	g8260
tig00000044_pilon_pilon_2331386	G	A	synonymous	g9413	T	T
tig00000046_pilon_pilon_1054531	C	T	synonymous	g9876	E	E
tig00000105_pilon_pilon_785348	C	T	promoter	g10823
tig00000105_pilon_pilon_1254264	C	T	non-synonymous	g11041	G	R
tig00000105_pilon_pilon_2177794	C	T	intergenic-region
tig00000107_pilon_pilon_2224181	C	T	synonymous	g12664	E	E
tig00000121_pilon_pilon_323657	C	T	non-synonymous	g13911	S	L
tig00000122_pilon_pilon_1197653	A	G	promoter	g15589
tig00000001_pilon_pilon_1208292	T	A	non-synonymous	g506	I	F
tig00000001_pilon_pilon_1987211	G	A	non-synonymous	g868	G	S
tig00000001_pilon_pilon_2154395	C	T	non-synonymous	g944	P	S
tig00000001_pilon_pilon_3805369	G	A	non-CDS	g1663
tig00000011_pilon_pilon_1991618	G	A	non-CDS	g2827
tig00000011_pilon_pilon_2152986	C	T	intergenic-region
tig00000011_pilon_pilon_2961656	A	T	non-synonymous	g3291	N	I
tig00000020_pilon_pilon_128981	C	T	non-synonymous	g3705	P	S
tig00000020_pilon_pilon_1012262	C	T	promoter	g4126
tig00000020_pilon_pilon_1416845	T	C	synonymous	g4320	E	E
tig00000020_pilon_pilon_1460957	C	T	non-synonymous	g4342	M	I
tig00000020_pilon_pilon_1732404	C	A	non-CDS	g4478
tig00000020_pilon_pilon_1752459	C	T	non-synonymous	g4486	A	T
tig00000020_pilon_pilon_2212838	C	T	synonymous	g4707	L	L
tig00000020_pilon_pilon_2484553	G	A	non-synonymous	g4833	Q	*
tig00000023_pilon_pilon_1143847	C	T	intergenic-region
tig00000023_pilon_pilon_1432666	A	T	non-CDS	g5691
tig00000023_pilon_pilon_1462218	G	T	non-CDS	g5704
tig00000023_pilon_pilon_1462219	C	T	non-CDS	g5704
tig00000023_pilon_pilon_1622865	C	T	synonymous	g5771	K	K
tig00000023_pilon_pilon_2400929	C	T	synonymous	g6112	L	L
tig00000023_pilon_pilon_2880931	C	T	non-synonymous	g6334	L	F
tig00000023_pilon_pilon_3228114	C	T	non-synonymous	g6487	S	F
tig00000035_pilon_pilon_361541	G	A	synonymous	g7157	L	L
tig00000035_pilon_pilon_736882	C	A	non-synonymous	g7314	E	D
tig00000035_pilon_pilon_1820895	C	T	non-synonymous	g7781	T	I
tig00000041_pilon_pilon_525276	G	A	intergenic-region
tig00000044_pilon_pilon_205125	G	A	intergenic-region
tig00000044_pilon_pilon_940479	T	A	non-synonymous	g8810	L	*
tig00000046_pilon_pilon_568788	C	T	intergenic-region
tig00000046_pilon_pilon_898024	G	A	synonymous	g9819	I	I
tig00000105_pilon_pilon_900518	C	T	non-synonymous	g10880	L	F
tig00000107_pilon_pilon_733904	C	T	synonymous	g12035	I	I
tig00000107_pilon_pilon_1023686	G	T	promoter	g12162
tig00000117_pilon_pilon_82420	T	C	intergenic-region
tig00000117_pilon_pilon_760597	A	C	non-CDS	g13470
tig00000121_pilon_pilon_202733	C	G	non-synonymous	g13864	G	R
tig00000121_pilon_pilon_2333047	C	T	intergenic-region
tig00000122_pilon_pilon_691962	C	T	synonymous	g15351	S	S
tig00000122_pilon_pilon_851228	G	A	intergenic-region
tig00000122_pilon_pilon_2528938	C	T	non-synonymous	g16179	S	L
tig00000001_pilon_pilon_633455	C	G	promoter	g253
tig00000001_pilon_pilon_1367092	A	G	synonymous	g579	P	P
tig00000001_pilon_pilon_2370959	G	A	non-synonymous	g1046	P	L
tig00000001_pilon_pilon_3121656	A	C	intergenic-region
tig00000001_pilon_pilon_3451669	A	G	non-CDS	g1506
tig00000001_pilon_pilon_4065690	G	A	synonymous	g1775	L	L
tig00000011_pilon_pilon_639488	T	G	synonymous	g2233	V	V
tig00000011_pilon_pilon_978942	C	T	non-synonymous	g2367	S	F
tig00000011_pilon_pilon_1848062	T	C	non-synonymous	g2756	F	S
tig00000020_pilon_pilon_326317	C	T	non-CDS	g3800
tig00000020_pilon_pilon_2551912	T	A	promoter	g4858
tig00000023_pilon_pilon_188359	T	G	non-CDS	g5126
tig00000023_pilon_pilon_622348	C	T	intergenic-region
tig00000023_pilon_pilon_1695303	A	G	non-synonymous	g5803	M	T
tig00000023_pilon_pilon_1695304	T	A	non-synonymous	g5803	M	L
tig00000035_pilon_pilon_1348883	T	C	non-synonymous	g7569	S	G
tig00000044_pilon_pilon_361306	C	T	synonymous	g8558	S	S
tig00000044_pilon_pilon_361307	A	C	non-synonymous	g8558	K	Q
tig00000044_pilon_pilon_1786470	A	G	intergenic-region
tig00000044_pilon_pilon_2124093	G	A	non-CDS	g9325
tig00000046_pilon_pilon_810830	A	C	non-CDS	g9774
tig00000048_pilon_pilon_106257	T	G	intergenic-region
tig00000105_pilon_pilon_181091	C	T	non-CDS	g10577
tig00000105_pilon_pilon_1923856	G	A	synonymous	g11343	Y	Y
tig00000107_pilon_pilon_1108895	T	A	intergenic-region
tig00000117_pilon_pilon_795950	T	C	non-synonymous	g13492	F	L
tig00000121_pilon_pilon_620668	G	A	intergenic-region
tig00000122_pilon_pilon_24229	A	G	non-synonymous	g15069	L	P
tig00000001_pilon_pilon_595122	A	G	intergenic-region
tig00000001_pilon_pilon_897020	G	A	non-CDS	g371
tig00000001_pilon_pilon_2094280	A	T	synonymous	g916	L	L
tig00000001_pilon_pilon_2359673	G	A	intergenic-region
tig00000001_pilon_pilon_2938069	T	A	non-CDS	g1281
tig00000001_pilon_pilon_3061996	G	A	non-synonymous	g1333	E	K
tig00000001_pilon_pilon_3094272	G	A	non-synonymous	g1347	L	F
tig00000001_pilon_pilon_3932513	A	T	non-synonymous	g1715	Q	H
tig00000011_pilon_pilon_81453	C	T	non-synonymous	g1994	P	L
tig00000011_pilon_pilon_2436083	C	T	non-synonymous	g3037	P	L
tig00000011_pilon_pilon_3546880	C	T	non-synonymous	g3545	G	R
tig00000020_pilon_pilon_252092	C	T	synonymous	g3768	I	I
tig00000020_pilon_pilon_295843	G	A	synonymous	g3784	L	L
tig00000020_pilon_pilon_295845	G	A	non-synonymous	g3784	A	V
tig00000020_pilon_pilon_2241469	T	A	non-CDS	g4721
tig00000023_pilon_pilon_2761019	T	A	non-CDS	g6277
tig00000030_pilon_pilon_98585	C	A	intergenic-region
tig00000030_pilon_pilon_129240	A	G	synonymous	g6868	F	F
tig00000041_pilon_pilon_427988	G	A	non-CDS	g8298
tig00000044_pilon_pilon_1708144	G	A	non-synonymous	g9145	D	N
tig00000046_pilon_pilon_466493	G	A	non-CDS	g9634
tig00000105_pilon_pilon_1209389	T	A	non-synonymous	g11015	Q	L
tig00000107_pilon_pilon_454955	G	A	promoter	g11906
tig00000118_pilon_pilon_241713	A	G	intergenic-region
tig00000121_pilon_pilon_1152343	C	T	non-CDS	g14282
tig00000122_pilon_pilon_138519	A	G	non-synonymous	g15104	F	L
tig00000122_pilon_pilon_681550	G	A	non-synonymous	g15346	G	R
tig00000122_pilon_pilon_1815024	C	T	promoter	g15874
tig00000001_pilon_pilon_1563005	C	T	non-CDS	g683
tig00000001_pilon_pilon_1563006	T	C	non-CDS	g683
tig00000001_pilon_pilon_2546588	G	A	non-synonymous	g1110	P	L
tig00000011_pilon_pilon_2596270	C	A	synonymous	g3119	P	P
tig00000011_pilon_pilon_3021788	C	T	non-CDS	g3319
tig00000020_pilon_pilon_1032445	G	A	synonymous	g4133	R	R
tig00000020_pilon_pilon_2344851	C	A	non-synonymous	g4764	T	K
tig00000020_pilon_pilon_2853909	T	G	intergenic-region
tig00000023_pilon_pilon_102152	T	C	synonymous	g5093	L	L
tig00000023_pilon_pilon_307360	G	A	non-synonymous	g5183	E	K
tig00000023_pilon_pilon_776767	T	A	non-CDS	g5400
tig00000023_pilon_pilon_1139993	A	G	non-synonymous	g5567	Y	H
tig00000023_pilon_pilon_1139994	G	A	synonymous	g5567	N	N
tig00000023_pilon_pilon_1640858	G	A	non-synonymous	g5777	L	F
tig00000023_pilon_pilon_1900178	C	T	synonymous	g5894	I	I
tig00000023_pilon_pilon_2623378	G	T	non-synonymous	g6222	L	F
tig00000023_pilon_pilon_3520479	C	T	intergenic-region
tig00000030_pilon_pilon_50084	C	T	synonymous	g6832	D	D
tig00000030_pilon_pilon_339631	C	T	non-synonymous	g6962	P	S
tig00000044_pilon_pilon_457452	T	C	non-CDS	g8606
tig00000044_pilon_pilon_609337	C	T	non-CDS	g8670
tig00000044_pilon_pilon_1184894	G	A	non-synonymous	g8920	G	E
tig00000044_pilon_pilon_1421516	C	T	non-CDS	g9023
tig00000044_pilon_pilon_1421616	C	T	intergenic-region
tig00000044_pilon_pilon_1639825	G	A	synonymous	g9109	L	L
tig00000105_pilon_pilon_1064719	C	T	intergenic-region
tig00000105_pilon_pilon_1501530	C	T	non-synonymous	g11145	T	I
tig00000105_pilon_pilon_2040420	C	G	non-synonymous	g11387	D	E
tig00000105_pilon_pilon_2076808	C	T	non-synonymous	g11402	S	F
tig00000117_pilon_pilon_495983	C	T	non-CDS	g13340
tig00000117_pilon_pilon_495988	C	T	non-CDS	g13340
tig00000117_pilon_pilon_776796	G	A	non-synonymous	g13478	L	F
tig00000117_pilon_pilon_1008170	G	A	intergenic-region
tig00000117_pilon_pilon_1008250	T	A	intergenic-region
tig00000121_pilon_pilon_221416	G	A	non-CDS	g13873
tig00000121_pilon_pilon_918838	T	C	non-CDS	g14175
tig00000121_pilon_pilon_2403581	C	T	promoter	g14776
tig00000122_pilon_pilon_853141	C	T	non-CDS	g15426
tig00000122_pilon_pilon_853142	C	T	synonymous	g15426	E	E
[truncated: 1,708 more rows]
